# Supplementary material for: Deprescribing fall-risk increasing drugs (FRIDs) for the prevention of falls and fall-related complications: a systematic review and meta-analysis
Source: PubMed Central journal article supplement — BMJ Open. 2021 Feb 10;11(2):e035978. doi: 10.1136/bmjopen-2019-035978 (PMC7878138; doi:10.1136/bmjopen-2019-035978), 2021-02-10

**Supplementary Figure S1: OVID Medline Search Strategy**

Database(s): OVID Medline Epub Ahead of Print, In-Process & Other Non-Indexed Citations, Ovid MEDLINE(R) Daily and Ovid MEDLINE(R) 1946 to Present  
Search Strategy:

| #  | Searches                                                                                                                                                                                                                                                                                                                                                                                                                                                                                                                  |
|----|---------------------------------------------------------------------------------------------------------------------------------------------------------------------------------------------------------------------------------------------------------------------------------------------------------------------------------------------------------------------------------------------------------------------------------------------------------------------------------------------------------------------------|
| 1  | exp Accidental Falls/pc [Prevention & Control]                                                                                                                                                                                                                                                                                                                                                                                                                                                                            |
| 2  | fall.mp. [mp=title, abstract, original title, name of substance word, subject heading word, floating sub-heading word, keyword heading word, protocol supplementary concept word, rare disease supplementary concept word, unique identifier, synonyms]                                                                                                                                                                                                                                                                   |
| 3  | falls.mp. [mp=title, abstract, original title, name of substance word, subject heading word, floating sub-heading word, keyword heading word, protocol supplementary concept word, rare disease supplementary concept word, unique identifier, synonyms]                                                                                                                                                                                                                                                                  |
| 4  | exp Deprescriptions/                                                                                                                                                                                                                                                                                                                                                                                                                                                                                                      |
| 5  | ((medicat* or drug*) adj3 (deprescrib* or withdraw* or cessat* or stop* or discontin*)).mp. [mp=title, abstract, original title, name of substance word, subject heading word, floating sub-heading word, keyword heading word, protocol supplementary concept word, rare disease supplementary concept word, unique identifier, synonyms]                                                                                                                                                                                |
| 6  | ((antihypertensive* or diuretic* or beta-blocker* or sedative* or hypnotic* or neuroleptic* or antipsychotic* or antidepressant* or benzodiazepine* or narcotic* or opioid* or narcotic* or NSAID*) adj3 (deprescrib* or withdraw* or cessat* or stop* or discontin*)).mp. [mp=title, abstract, original title, name of substance word, subject heading word, floating sub-heading word, keyword heading word, protocol supplementary concept word, rare disease supplementary concept word, unique identifier, synonyms] |
| 7  | fall-risk increasing drugs.mp.                                                                                                                                                                                                                                                                                                                                                                                                                                                                                            |
| 8  | FRID.mp.                                                                                                                                                                                                                                                                                                                                                                                                                                                                                                                  |
| 9  | ((medicat* or drug*) adj3 (review* or improv* or program*)).mp. [mp=title, abstract, original title, name of substance word, subject heading word, floating sub-heading word, keyword heading word, protocol supplementary concept word, rare disease supplementary concept word, unique identifier, synonyms]                                                                                                                                                                                                            |
| 10 | exp "Drug-Related Side Effects and Adverse Reactions"/pc [Prevention & Control]                                                                                                                                                                                                                                                                                                                                                                                                                                           |
| 11 | exp Medication Therapy Management/ or exp "Drug Utilization Review/"                                                                                                                                                                                                                                                                                                                                                                                                                                                      |
| 12 | 4 or 5 or 6 or 7 or 8 or 9 or 10 or 11                                                                                                                                                                                                                                                                                                                                                                                                                                                                                    |
| 13 | 1 or 2 or 3                                                                                                                                                                                                                                                                                                                                                                                                                                                                                                               |
| 14 | 12 and 13                                                                                                                                                                                                                                                                                                                                                                                                                                                                                                                 |
| 15 | remove duplicates from 14                                                                                                                                                                                                                                                                                                                                                                                                                                                                                                 |
| 16 | exp Clinical Trial/                                                                                                                                                                                                                                                                                                                                                                                                                                                                                                       |
| 17 | (randomized or randomised).ab,ti.                                                                                                                                                                                                                                                                                                                                                                                                                                                                                         |
| 18 | placebo.ab,ti.                                                                                                                                                                                                                                                                                                                                                                                                                                                                                                            |
| 19 | randomly.ab,ti.                                                                                                                                                                                                                                                                                                                                                                                                                                                                                                           |
| 20 | groups.ab,ti.                                                                                                                                                                                                                                                                                                                                                                                                                                                                                                             |
| 21 | randomized controlled trial.pt.                                                                                                                                                                                                                                                                                                                                                                                                                                                                                           |
| 22 | controlled clinical trial.pt.                                                                                                                                                                                                                                                                                                                                                                                                                                                                                             |
| 23 | 16 or 17 or 18 or 19 or 20 or 21 or 22                                                                                                                                                                                                                                                                                                                                                                                                                                                                                    |
| 24 | 15 and 23                                                                                                                                                                                                                                                                                                                                                                                                                                                                                                                 |

## Supplementary Figure S2: Subgroup Analyses

### 1.2 Falls Rate - Known vs. Unknown Faller

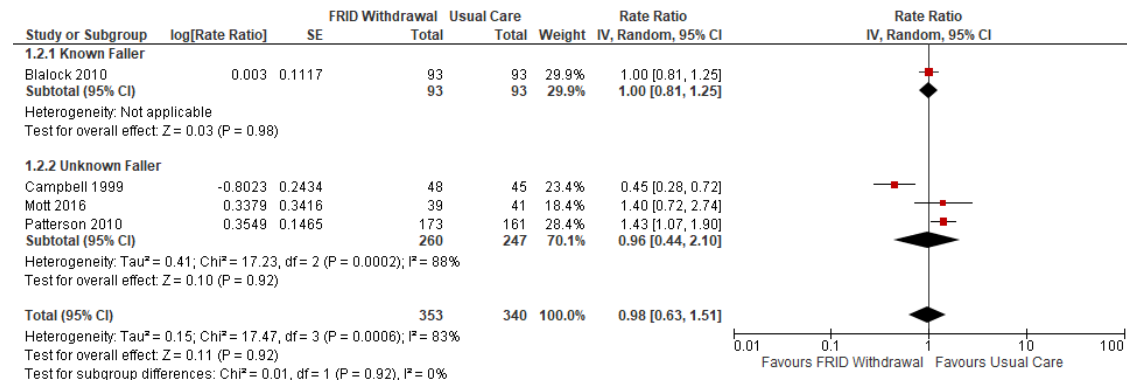

### 1.3 Falls Rate - Community vs. Institutionalized

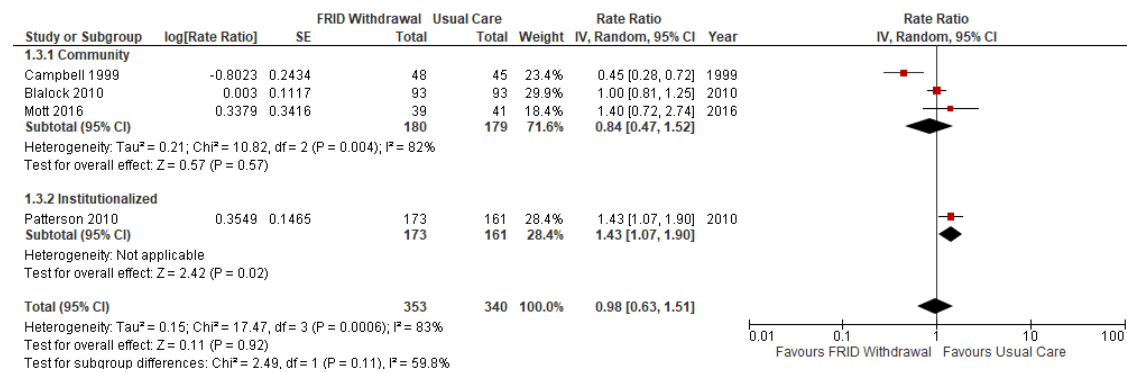

### 1.4 Falls Rate - Psychotropic Withdrawal vs. Any FRID Withdrawal

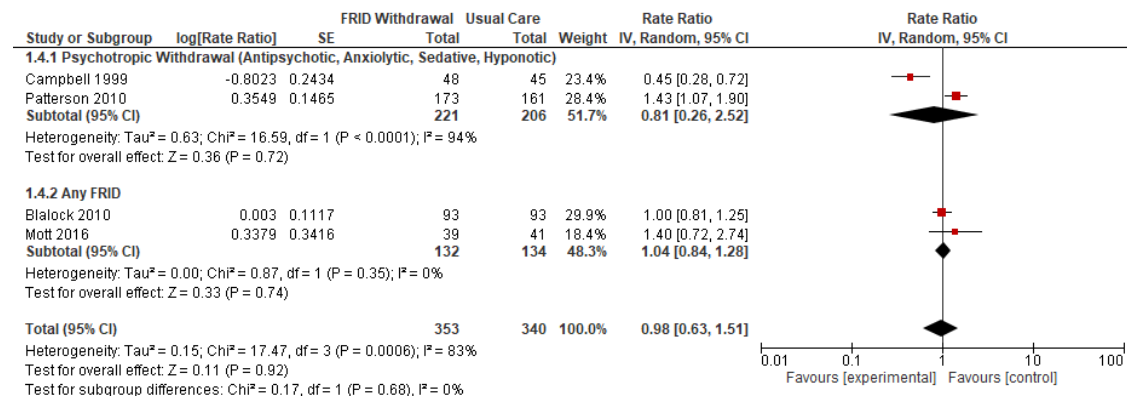

### 1.5 Falls Rate - Physician vs. Pharmacist Medication Review

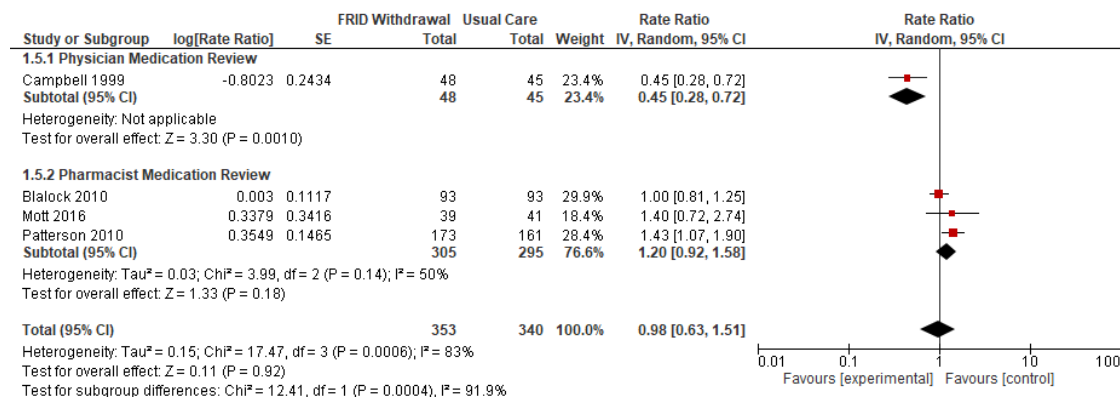

### 1.6 Falls Rate - Observed vs. Self-Reported Falls

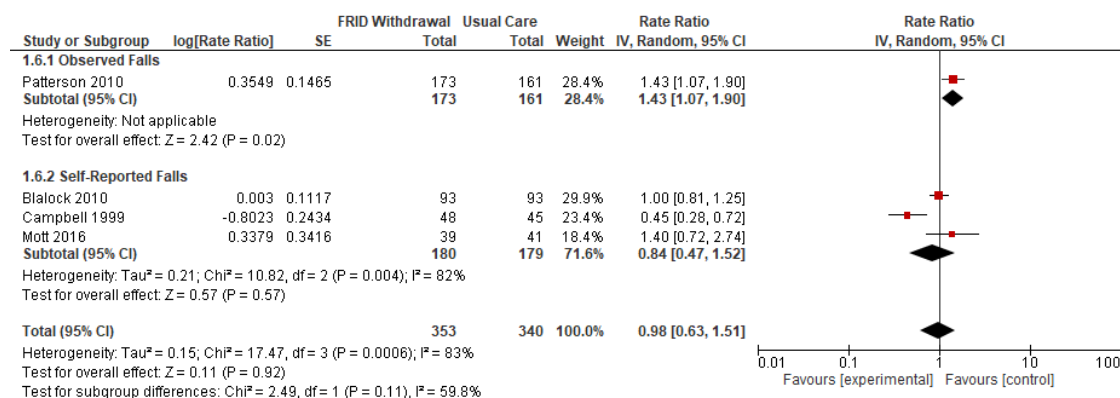

## 2.2 Falls Incidence - Known vs. Unknown Faller

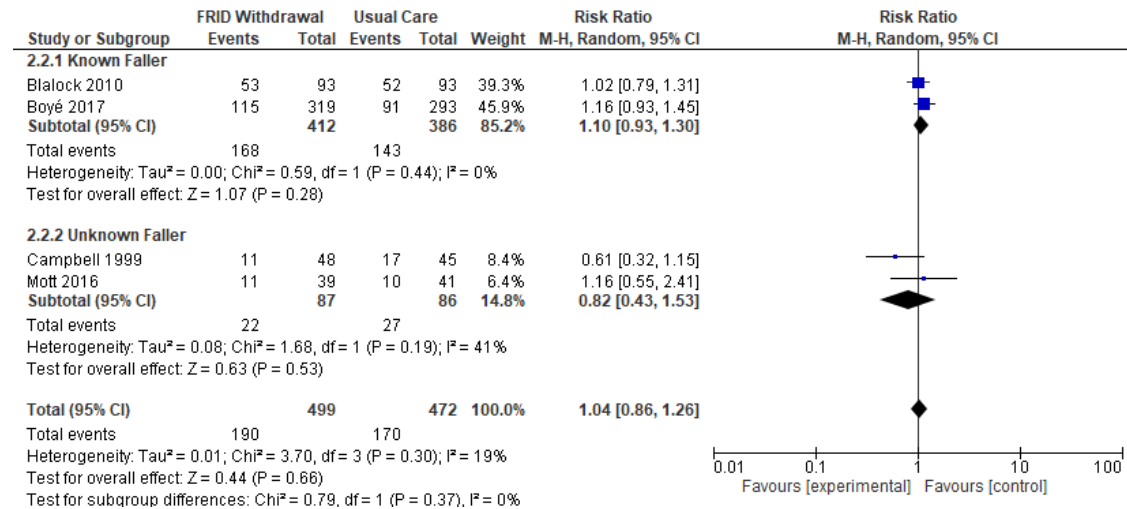

## 2.3 Falls Incidence - Psychotropic Withdrawal vs. Any FRID Withdrawal

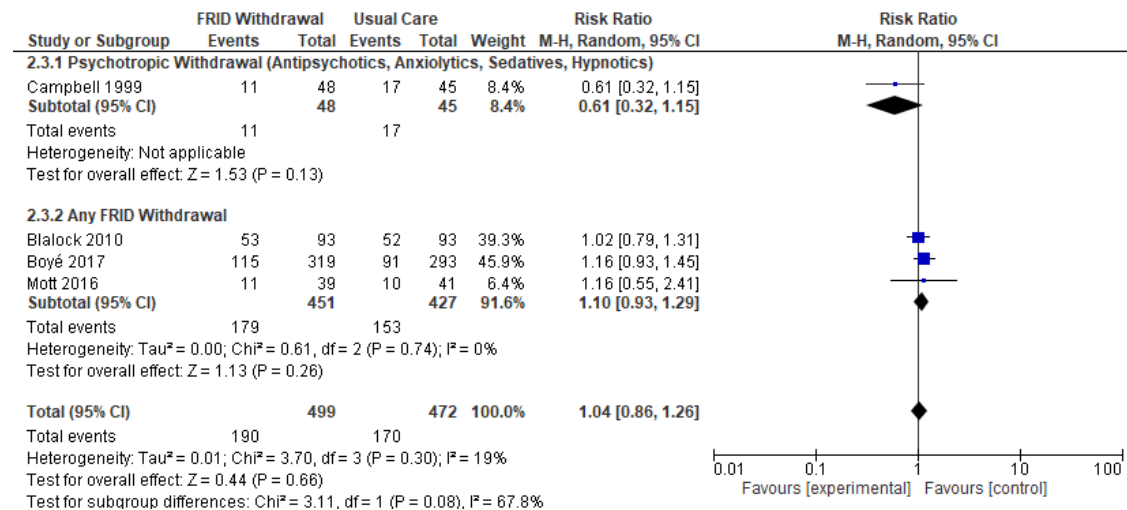

## 2.4 Falls Incidence - Physician vs. Pharmacist Medication Review

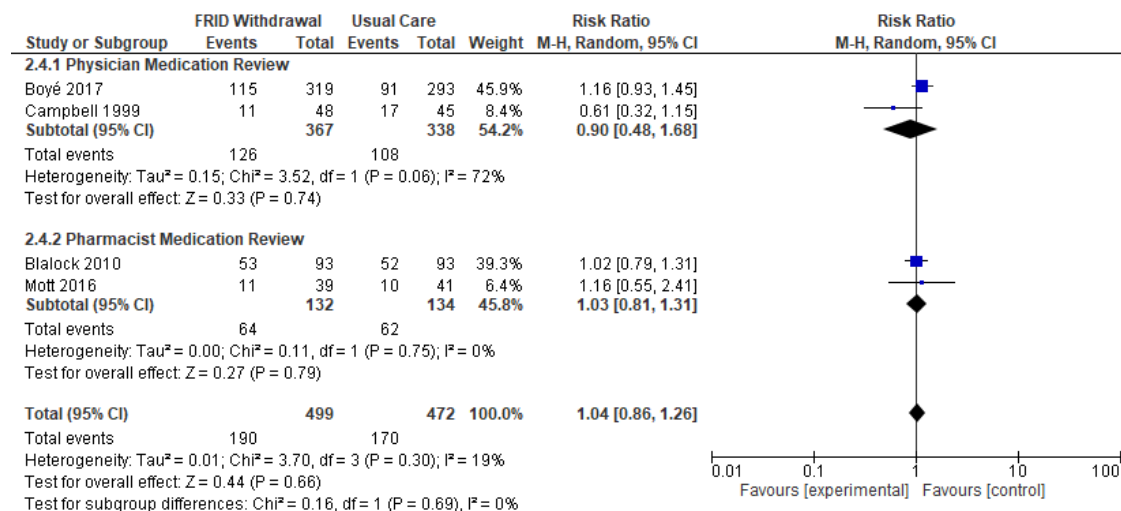

**Supplementary Table S1: Subgroup Credibility Assessment – Clinician Medication Review****Physician vs. Pharmacist Medication Review Subgroup for Falls Rate**

| <b>Design</b>                                                                                         | <b>Criteria Met?</b>                                                |
|-------------------------------------------------------------------------------------------------------|---------------------------------------------------------------------|
| Is the subgroup variable a characteristic measured at baseline or after randomization?                | Yes – Variable determined at baseline                               |
| Is the effect suggested by comparisons within rather than between studies?                            | No – Comparison between studies                                     |
| Was the hypothesis specified a priori?                                                                | Yes                                                                 |
| Was the direction of the subgroup effect specified a priori?                                          | No                                                                  |
| Was the subgroup effect one of a small number of hypothesized effects tested?                         | Yes – 1 of 5 analyses                                               |
| <b>Analysis</b>                                                                                       |                                                                     |
| Does the interaction test suggest a low likelihood that chance explains the apparent subgroup effect? | Yes – $p = 0.0004$                                                  |
| Is the significant subgroup effect independent?                                                       | Yes                                                                 |
| <b>Context</b>                                                                                        |                                                                     |
| Is the size of the subgroup effect large?                                                             | Yes – RaR 0.45 vs. 1.20                                             |
| Is the interaction consistent across studies?                                                         | No                                                                  |
| Is the interaction consistent across closely related outcomes within the study?                       | No – Subgroup interaction was not seen for incidence of falls       |
| Is there indirect evidence that supports the hypothesized interaction (biological rationale)?         | No - No compelling external evidence supporting subgroup hypothesis |

**Supplementary Table S2: Subgroup Credibility Assessment – FRID Withdrawal Type****Antipsychotic vs. Any FRID Withdrawal for Falls Incidence**

| <b>Design</b>                                                                                         | <b>Criteria Met?</b>                                                                                                                                                         |
|-------------------------------------------------------------------------------------------------------|------------------------------------------------------------------------------------------------------------------------------------------------------------------------------|
| Is the subgroup variable a characteristic measured at baseline or after randomization?                | Yes – Variable determined at baseline                                                                                                                                        |
| Is the effect suggested by comparisons within rather than between studies?                            | No – Comparison between studies                                                                                                                                              |
| Was the hypothesis specified a priori?                                                                | Yes                                                                                                                                                                          |
| Was the direction of the subgroup effect specified a priori?                                          | No                                                                                                                                                                           |
| Was the subgroup effect one of a small number of hypothesized effects tested?                         | Yes – 1 of 3 analyses                                                                                                                                                        |
| <b>Analysis</b>                                                                                       |                                                                                                                                                                              |
| Does the interaction test suggest a low likelihood that chance explains the apparent subgroup effect? | Yes – $p=0.06$                                                                                                                                                               |
| Is the significant subgroup effect independent?                                                       | No                                                                                                                                                                           |
| <b>Context</b>                                                                                        |                                                                                                                                                                              |
| Is the size of the subgroup effect large?                                                             | Yes – RR 0.61 vs. 1.14                                                                                                                                                       |
| Is the interaction consistent across studies?                                                         | No                                                                                                                                                                           |
| Is the interaction consistent across closely related outcomes within the study?                       | No – Subgroup interaction was not seen for rate of falls                                                                                                                     |
| Is there indirect evidence that supports the hypothesized interaction (biological rationale)?         | Yes – Antipsychotics associated with one of highest risks of falls. The withdrawal of any FRID may involve withdrawal of those with lower risks and limit potential benefit. |

### Supplementary Figure S3: Sensitivity Analyses

#### 4.1 Falls Rate - Low vs. High Risk of Bias due to Blinding

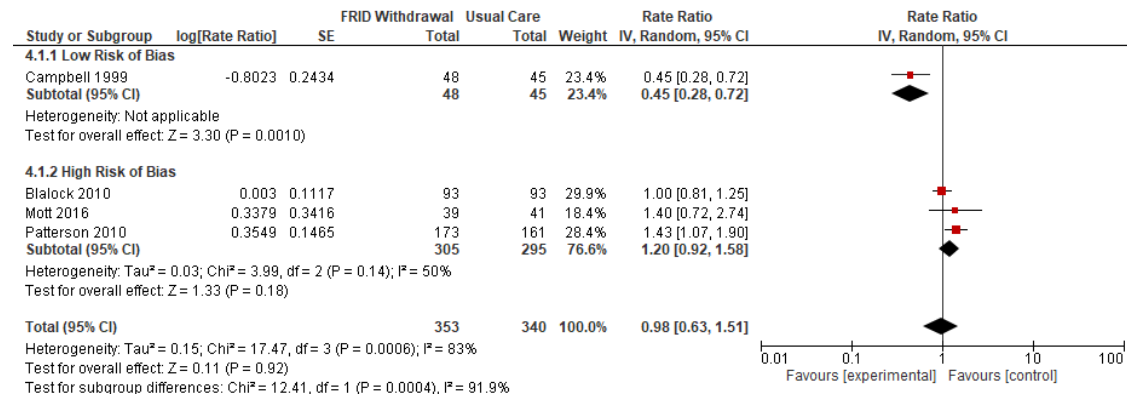

#### 4.2 Falls Rate - Low vs. High Risk of Bias due to Attritional Bias

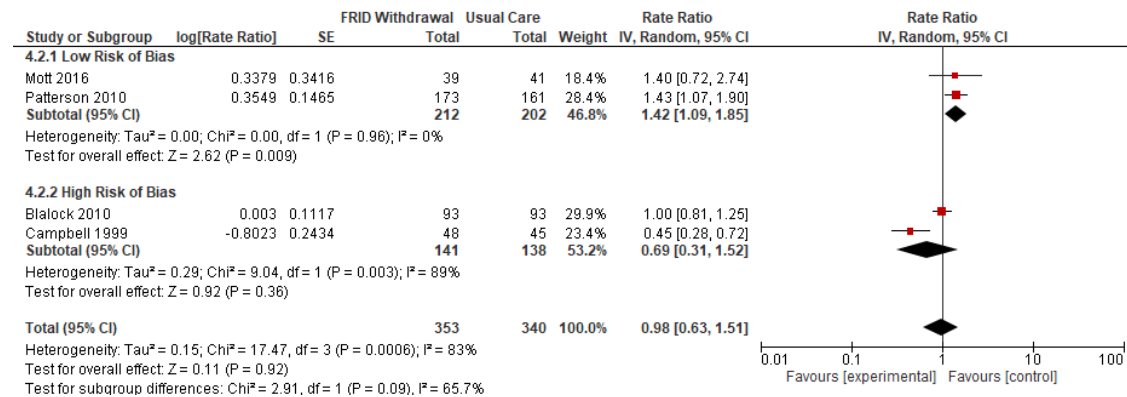



### 4.3 Falls Incidence - Low vs. High Risk of Bias due to Blinding

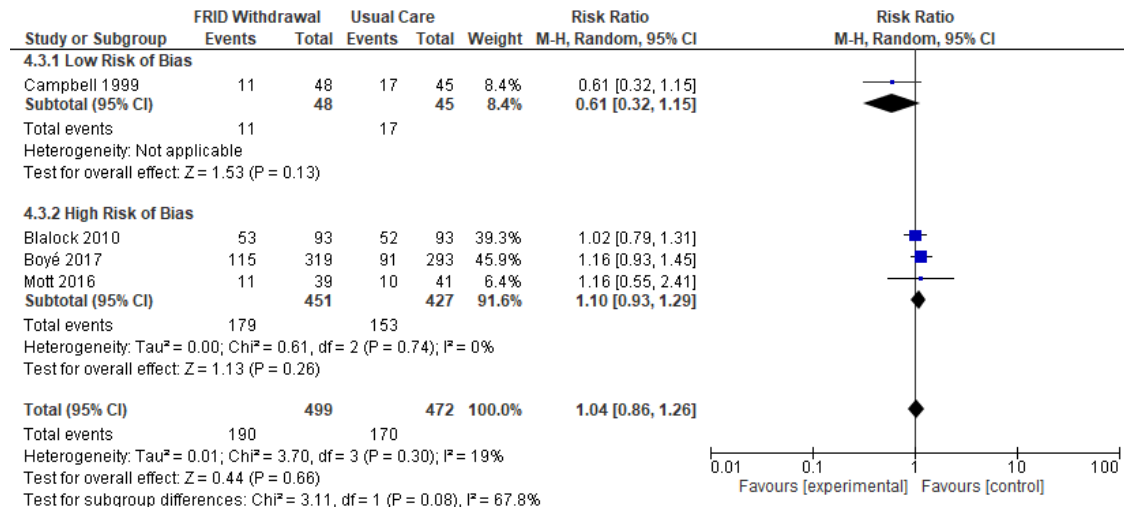

### 4.4 Falls Incidence - Low vs. High Risk of Bias due to Attrition Bias

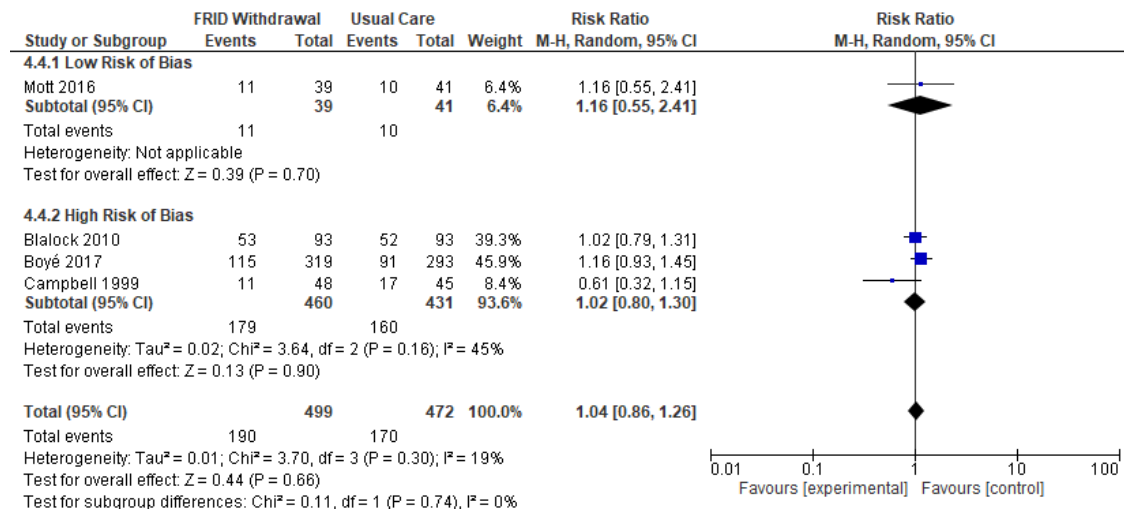

## 4.5 Falls Rate – Random vs. Effects Model

### Random Effects Model

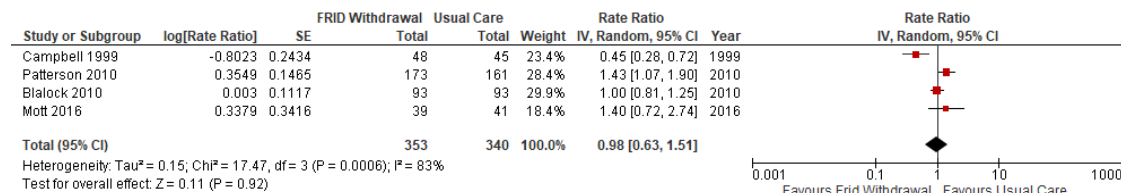

### Fixed Effects Model

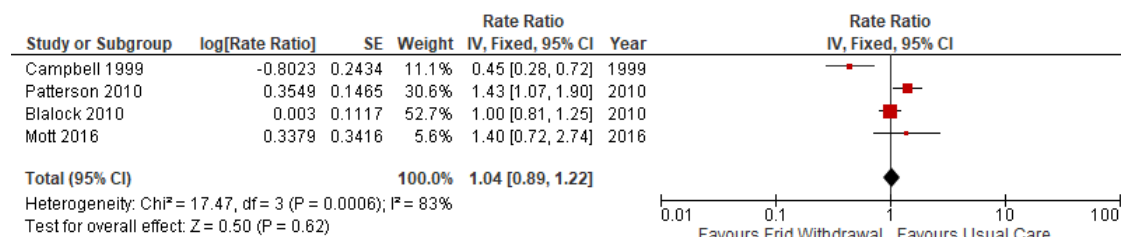

## 4.6 Falls Incidence – Random vs. Fixed Effects Model

### Random Effects Model

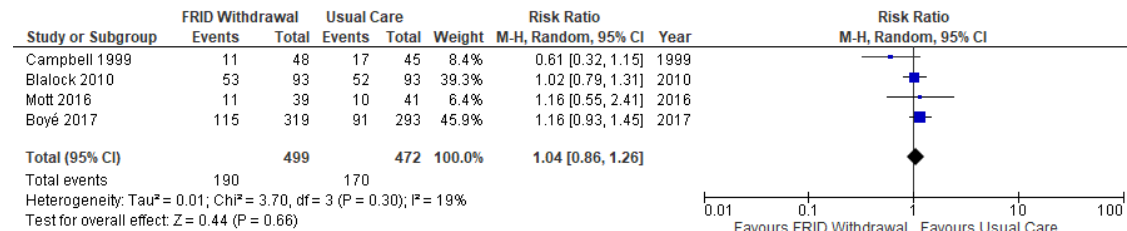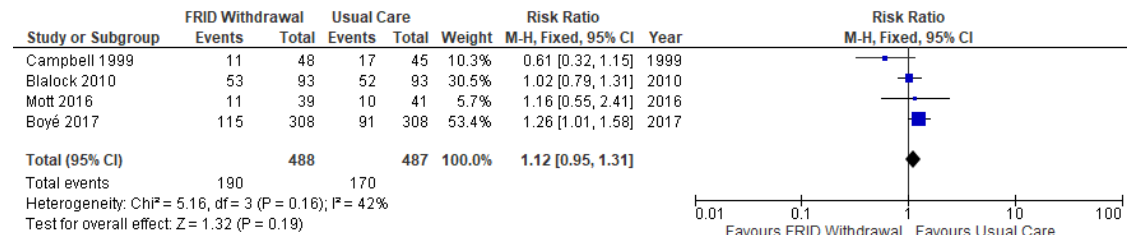

### Fixed Effects Model

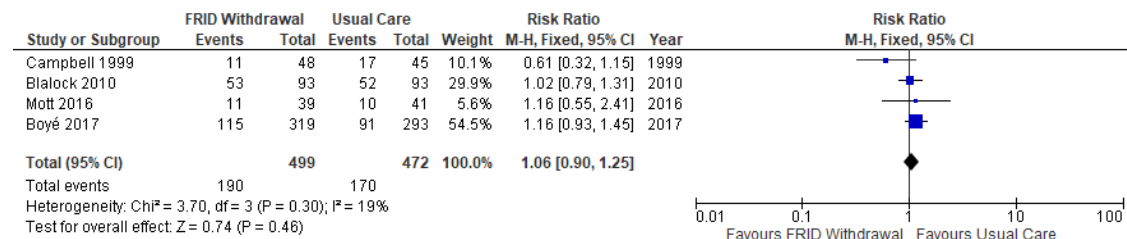

Supplement: bmjopen-2019-035978supp001.pdf [file bmjopen-2019-035978supp001.pdf]
