# Supplementary material for: Deprescribing fall-risk increasing drugs (FRIDs) for the prevention of falls and fall-related complications: a systematic review and meta-analysis
Source: PubMed Central journal article supplement — BMJ Open. 2021 Feb 10;11(2):e035978. doi: 10.1136/bmjopen-2019-035978 (PMC7878138; doi:10.1136/bmjopen-2019-035978), 2021-02-10
Supplement: bmjopen-2019-035978.draft_revisions.pdf [file bmjopen-2019-035978.draft_revisions.pdf]

# BMJ Open

BMJ Open is committed to open peer review. As part of this commitment we make the peer review history of every article we publish publicly available.

When an article is published we post the peer reviewers' comments and the authors' responses online. We also post the versions of the paper that were used during peer review. These are the versions that the peer review comments apply to.

The versions of the paper that follow are the versions that were submitted during the peer review process. They are not the versions of record or the final published versions. They should not be cited or distributed as the published version of this manuscript.

BMJ Open is an open access journal and the full, final, typeset and author-corrected version of record of the manuscript is available on our site with no access controls, subscription charges or pay-per-view fees (<http://bmjopen.bmj.com>).

If you have any questions on BMJ Open's open peer review process please email [info.bmjopen@bmj.com](mailto:info.bmjopen@bmj.com)

# BMJ Open

## Deprescribing Fall-Risk-Increasing Drugs (FRIDs) for the Prevention of Falls and Fall-related Complications: A Systematic Review and Meta-analysis

|                               |                                                                                                                                                                                                                                                                                                                                                                                                                                                                                                                                                                                                                                                                                                                                                                                                 |
|-------------------------------|-------------------------------------------------------------------------------------------------------------------------------------------------------------------------------------------------------------------------------------------------------------------------------------------------------------------------------------------------------------------------------------------------------------------------------------------------------------------------------------------------------------------------------------------------------------------------------------------------------------------------------------------------------------------------------------------------------------------------------------------------------------------------------------------------|
| Journal:                      | <i>BMJ Open</i>                                                                                                                                                                                                                                                                                                                                                                                                                                                                                                                                                                                                                                                                                                                                                                                 |
| Manuscript ID                 | bmjopen-2019-035978                                                                                                                                                                                                                                                                                                                                                                                                                                                                                                                                                                                                                                                                                                                                                                             |
| Article Type:                 | Original research                                                                                                                                                                                                                                                                                                                                                                                                                                                                                                                                                                                                                                                                                                                                                                               |
| Date Submitted by the Author: | 28-Nov-2019                                                                                                                                                                                                                                                                                                                                                                                                                                                                                                                                                                                                                                                                                                                                                                                     |
| Complete List of Authors:     | Lee, Justin; McMaster University, Division of Geriatric Medicine, Department of Medicine; McMaster University, Department of Health Research Methods, Evidence and Impact<br>Negm, AM; McMaster University Faculty of Health Sciences, School of Rehabilitation Sciences; Hamilton Health Sciences, Geriatric Education and Research in Aging Sciences Centre<br>Peters, Ryan; McMaster University Faculty of Health Sciences, Michael G. DeGroote School of Medicine<br>Wong, Eric; University of Toronto, Division of Geriatric Medicine, Department of Medicine<br>Holbrook, Anne; McMaster University, Division of Clinical Pharmacology and Toxicology, Department of Medicine; McMaster University Faculty of Health Sciences, Department of Health Research Methods, Evidence and Impact |
| Keywords:                     | INTERNAL MEDICINE, CLINICAL PHARMACOLOGY, GERIATRIC MEDICINE                                                                                                                                                                                                                                                                                                                                                                                                                                                                                                                                                                                                                                                                                                                                    |
|                               |                                                                                                                                                                                                                                                                                                                                                                                                                                                                                                                                                                                                                                                                                                                                                                                                 |

SCHOLARONE™  
Manuscripts

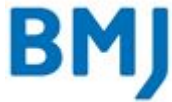

I, the Submitting Author has the right to grant and does grant on behalf of all authors of the Work (as defined in the below author licence), an exclusive licence and/or a non-exclusive licence for contributions from authors who are: i) UK Crown employees; ii) where BMJ has agreed a CC-BY licence shall apply, and/or iii) in accordance with the terms applicable for US Federal Government officers or employees acting as part of their official duties; on a worldwide, perpetual, irrevocable, royalty-free basis to BMJ Publishing Group Ltd ("BMJ") its licensees and where the relevant Journal is co-owned by BMJ to the co-owners of the Journal, to publish the Work in this journal and any other BMJ products and to exploit all rights, as set out in our [licence](#).

The Submitting Author accepts and understands that any supply made under these terms is made by BMJ to the Submitting Author unless you are acting as an employee on behalf of your employer or a postgraduate student of an affiliated institution which is paying any applicable article publishing charge ("APC") for Open Access articles. Where the Submitting Author wishes to make the Work available on an Open Access basis (and intends to pay the relevant APC), the terms of reuse of such Open Access shall be governed by a Creative Commons licence – details of these licences and which [Creative Commons](#) licence will apply to this Work are set out in our licence referred to above.

Other than as permitted in any relevant BMJ Author's Self Archiving Policies, I confirm this Work has not been accepted for publication elsewhere, is not being considered for publication elsewhere and does not duplicate material already published. I confirm all authors consent to publication of this Work and authorise the granting of this licence.

1  
2  
3 **TITLE:** Deprescribing Fall-Risk-Increasing Drugs (FRIDs) for the Prevention of Falls and  
4  
5 Fall-related Complications: A Systematic Review and Meta-analysis  
6  
7  
8  
9

10 **AUTHORS:** Justin Lee, BScPhm, ACPR, MD<sup>1,2,3</sup>

11  
12 Ahmed Negm, MD, MSc, PhD<sup>3,4</sup>

13  
14 Ryan Peters, BSc, MD<sup>5</sup>

15  
16 Eric Wong, BSc, MD<sup>6</sup>

17  
18 Anne Holbrook, MD, PharmD, MSc<sup>2,7</sup>  
19  
20  
21  
22  
23

24 <sup>1</sup>Division of Geriatric Medicine, Department of Medicine, McMaster University, Hamilton,  
25 Ontario, Canada

26 <sup>2</sup>Department of Health Research Methods, Evidence, and Impact, McMaster University,  
27 Hamilton,  
28 Ontario, Canada

29 <sup>3</sup>Geriatric Education and Research in Aging Sciences (GERAS) Centre, Hamilton, Ontario,  
30 Canada

31 <sup>4</sup>School of Rehabilitation Sciences, Faculty of Health Sciences, McMaster University, Hamilton  
32 Ontario, Canada;

33 <sup>5</sup>Michael DeGroote School of Medicine, McMaster University, Hamilton, Ontario, Canada

34 <sup>6</sup>Division of Geriatric Medicine, Department of Medicine, University of Toronto, Toronto,  
35 Ontario, Canada

36 <sup>7</sup>Division of Clinical Pharmacology and Toxicology, Department of Medicine, McMaster  
37 University, Hamilton, Ontario, Canada  
38  
39  
40

41 **CORRESPONDING AUTHOR:** Justin Lee  
42 Geriatric Education and Research in Aging Sciences Centre  
43 88 Maplewood Avenue, Room 158  
44 Hamilton, Ontario, Canada L8M 1W9  
45 Email: [justin.lee@medportal.ca](mailto:justin.lee@medportal.ca)  
46 Telephone: (905) 521-2100  
47  
48

49 **MAIN TEXT WORD COUNT:** 3220 (excluding title page, abstract, references, tables)  
50  
51  
52  
53  
54  
55  
56  
57  
58  
59  
60

**ABSTRACT:**

**Objectives:** Prevention of falls and fall-related injuries is a priority due to the substantial health and financial burden of falls on patients and healthcare systems. Deprescribing medications known as “fall-risk increasing drugs” (FRIDs) is a common strategy to prevent falls based on retrospective observational associations and presumed benefit. We conducted a systematic review to determine its efficacy for the prevention of falls and fall-related complications.

**Design:** Systematic review and meta-analysis

**Data sources:** MEDLINE, EMBASE, CENTRAL, CINAHL and grey literature from inception to March 31, 2019.

**Eligibility criteria for selecting studies:** Randomized controlled trials of FRID withdrawal compared to usual care evaluating the rate of falls, incidence of falls, fall-related injuries, fall-related fractures, fall-related hospitalization or adverse effects related to the intervention in adults aged  $\geq 65$  years.

**Data extraction and synthesis:** Two reviewers independently performed citation screening, data abstraction, risk of bias assessment and certainty of evidence grading. Random-effects models were used for meta-analyses.

**Results:** Five trials involving 1305 participants met eligibility criteria for inclusion. Deprescribing FRIDs did not change the rate of falls (rate ratio [RaR] 0.98, 95% CI 0.63 to 1.51), the incidence

1  
2  
3 of falls (risk difference [RD] 0.01, 95% CI -0.06 to 0.09; relative risk [RR] 1.04, 95% CI 0.86 to  
4  
5 1.26) or rate of fall-related injuries (RaR 0.89, 95% CI 0.57 to 1.39) over a 6 to 12 month follow-  
6  
7 up period. No trials evaluated the impact of deprescribing FRIDs on fall-related fractures or  
8  
9 hospitalizations.  
10

11  
12  
13  
14 **Conclusion:** There is a paucity of robust high-quality evidence to support or refute that a FRID  
15  
16 deprescribing strategy is effective at preventing falls or falls-related injury in older adults.  
17  
18 Although there may be other reasons to deprescribe FRIDs, our systematic review found that it  
19  
20 may result in little to no difference in the rate or risk of falls.  
21  
22  
23  
24  
25

26 **Registration:** PROSPERO CRD42016040203  
27  
28  
29

30  
31 **Key Words:** Falls, Falls prevention, Fall-risk increasing drug (FRID), Deprescribing, Medication  
32  
33 withdrawal, Seniors, Older Adults, Systematic review  
34  
35  
36  
37

38 **Word Count: 298**  
39  
40  
41  
42  
43  
44  
45  
46  
47  
48  
49  
50  
51  
52  
53  
54  
55  
56  
57  
58  
59  
60

## ARTICLE SUMMARY

### Strengths and Limitations of this Study:

- This study's results are based on a systematic review and meta-analysis of randomised controlled trials
- We employed rigorous analytic methods and interpretational approaches including duplicate assessment, subgroup credibility criteria and optimal information size considerations.
- We assessed the certainty in evidence (i.e. quality of evidence) using the Grading of Recommendations, Assessment, Development and Evaluation (GRADE) Framework.
- Additional studies are needed to reach the optimal information size to reduce uncertainty about this intervention and establish its relative importance in the range of possible fall prevention interventions

## INTRODUCTION

Falls and fall-related injuries are significant public health concerns. Every year, 1 in 3 older adults aged  $\geq 65$  years falls and 10% of these falls cause serious injury or hospitalization.[1] Falls are estimated to annually cost \$50 billion in the United States, \$2 billion in Canada, and £2.3 billion in the United Kingdom.[2–4] All jurisdictional levels are making significant investments to implement falls prevention quality improvement initiatives. These include Public Health England’s National Falls Prevention Coordinating Group (NFPRCG), the Centers for Disease Control and Prevention (CDC) Stopping Elderly Accidents, Deaths, & Injuries (STEADI) Initiative, and Health Canada’s Canadian Patient Safety Institute “Reducing Falls and Injuries from Falls” initiative. National accreditation bodies such as the United States Joint Commission and Accreditation Canada also mandate specific falls prevention activities of healthcare organizations through their required organizational practices and standards.

Since the majority of falls result from multiple factors (e.g. poor strength and balance, visual and cognitive impairment), current practice guidelines and accreditation standards focus on multi-component assessment and intervention strategies.[5] However, the 2018 United States Preventive Services Task Force evidence report recommends that multifactorial interventions only be offered to select patients because the overall net benefit is small.[6] In fact, there is ongoing debate on the relative merits of focusing on single versus multifactorial interventions, and many clinicians and institutions focus on single interventions due to limited resources.[7]

As an individual intervention, only exercise has robust evidence demonstrating reductions in the incidence of fallers and rate of injurious falls.[6,8] It is unclear if other parts of the multi-component strategy are effective, how large is their individual treatment effect, and which components should be prioritized when resources are limited.



1  
2  
3 Despite limited evidence of effectiveness, deprescribing medications known as “fall-risk  
4 increasing drugs” (FRIDs) is common practice and typically included in both multifactorial and  
5 single intervention strategies. The justification is based on the belief that certain medications  
6 increase the risk for falls. These include anti-hypertensives, anti-arrhythmics, anti-cholinergics,  
7 anti-histamines, sedatives-hypnotics, anti-psychotics, anti-depressants, opioids and NSAIDs.[9–  
8 11] This evidence is based primarily on retrospective observational data with limited adjustment  
9 for confounders, dosage or duration of therapy. It is therefore unclear whether the associated  
10 increase in falls is truly related to such drug use versus the underlying conditions or patients for  
11 which the drugs are treating.  
12  
13  
14  
15  
16  
17  
18  
19  
20  
21  
22  
23

24 To justify the common practice of deprescribing FRIDs, confirmation of its effectiveness  
25 as a fall prevention strategy in older adults is needed. To the best of our knowledge, no previous  
26 systematic review has addressed this specific question nor incorporated new data from the largest  
27 RCT of FRID withdrawal to date.[12] We therefore conducted this systematic review to evaluate  
28 the deprescribing of FRIDs to prevent falls and clarify its evidence base.  
29  
30  
31  
32  
33  
34  
35  
36  
37

## 38 **METHODS**

39  
40 This review was developed using the Cochrane Handbook and reported in accordance with  
41 the Preferred Reporting Items for Systematic Reviews and Meta-Analyses (PRISMA)  
42 guidelines.[13,14] The protocol was registered in PROSPERO (CRD42016040203) and  
43 previously published and described in detail.[15]  
44  
45  
46  
47  
48  
49  
50

### 51 **Search Strategy**

52  
53  
54  
55  
56  
57  
58  
59  
60

1  
2  
3 MEDLINE, EMBASE, CINAHL and the Cochrane Central Register of Controlled Trials  
4 (CENTRAL) electronic databases were searched from inception to March 31, 2019 using a  
5  
6 combination of Medical Subject Headings, controlled and free-text terms synonymous for the  
7  
8 intervention. The MEDLINE search strategy is shown in Supplementary Figure S1. This strategy  
9  
10 was modified for use in other databases.  
11  
12  
13

14  
15 Reference lists of relevant studies, reviews and guidelines were reviewed to identify  
16  
17 additional studies. Trial registries and geriatric medicine conference abstracts were also reviewed.  
18  
19  
20

### 21 **Study Eligibility Criteria**

22  
23  
24 After pilot testing the eligibility criteria, pairs of reviewers independently conducted  
25  
26 screening. A third reviewer resolved disagreements.  
27

28  
29 Studies were included if they were RCTs evaluating FRID deprescribing or withdrawal  
30  
31 with the intent of reducing falls. FRID deprescribing was defined as the planned and supervised  
32  
33 discontinuation or dose reduction of single or multiple medications thought to independently  
34  
35 increase falls risk.[9–11]  
36

37  
38 The comparator could be usual care (i.e. no change in usual activities and/or no FRID  
39  
40 withdrawal) or a control intervention not thought to reduce falls. Studies focused on adults aged  
41  
42  $\geq 65$  years from all settings were included. Studies involving FRID withdrawal within multi-  
43  
44 component interventions were excluded if the effect of FRID withdrawal could not be isolated.  
45

46  
47 The primary outcomes of this review were the (1) rate of falls (defined as the total number  
48  
49 of falls per unit of person time that falls were monitored) and (2) incidence of falls (i.e. number of  
50  
51 fallers). Secondary outcomes included the incidence of (1) fall-related fractures, (2) fall-related  
52  
53  
54  
55  
56  
57  
58  
59

1  
2  
3 injuries, (3) fall-related hospitalization, (4) adverse effects related to the withdrawal intervention  
4  
5 (e.g. disease relapse, symptomatic withdrawal).  
6  
7  
8  
9

## 10 **Data Extraction and Quality Assessment**

11  
12 Two reviewers independently abstracted data on general study characteristics, study  
13 participants, interventions, comparisons, and outcomes using standardized electronic data  
14 extraction forms. Disagreements were resolved through consensus.  
15  
16  
17  
18

19 Two reviewed independently conducted risk of bias (RoB) assessments using the Cochrane  
20 Risk of Bias tool.[16] A previously published modification to the RoB assessment was employed  
21 to estimate unclearly reported study methods and allow for sensitivity analysis.[17] This  
22 modification involved a structured approach where a score of “definitely low risk”, “probably low  
23 risk”, “probably high risk”, or “definitely high risk” was assigned to each RoB criterion.  
24 “Definitely” and “probably” scores were collapsed for both low- and high-risk of bias score.  
25  
26  
27  
28  
29  
30  
31  
32  
33 Disagreements were resolved through consensus.  
34  
35  
36  
37

## 38 **Data Synthesis and Analysis**

39  
40 The rate of falls was reported as a rate ratio (RaR) with a 95% confidence interval (CI).  
41  
42 Dichotomous outcomes (i.e. incidences of falls, fall-related fracture, fall-related injury, fall-related  
43 hospitalization and adverse effects related to the withdrawal intervention) have been reported as  
44 risk ratios (RR) with 95% CIs.  
45  
46  
47  
48

49 We used RevMan 5.3 and the intention-to-treat principle for all statistical analyses. We  
50 conducted meta-analyses using the generic inverse variance method to allow pooling of effect  
51 estimates. A random effects model was used given expected between-trial variations in  
52  
53  
54  
55  
56  
57  
58  
59  
60

1  
2  
3 methodological, participant and medication characteristics between studies. We had originally  
4 planned to pool data at various pre-specified time intervals, but all included studies had follow-up  
5 between 6 to 12 months.  
6  
7  
8  
9

10 We assessed heterogeneity through visual inspection of forest plots and statistical tests. A  
11 two-tailed test with p-value <0.10 was considered significant for all Chi-square analyses as per  
12 recommendations from the Cochrane Handbook and the  $I^2$  was interpreted using the Cochrane  
13 Collaboration thresholds.[13]  
14  
15  
16  
17  
18

19 Heterogeneity was explored in subgroup analyses based on five a priori hypotheses  
20 (Supplementary Table S1).[15] These included differences in baseline propensity for falls as  
21 influenced by (1) a history of recurrent falls (e.g., known faller or not) or (2) place of residence or  
22 care (e.g., community, long-term care); differences in the intervention as influenced by (3) specific  
23 medication class(es) chosen for withdrawal and (4) preceding medication review by clinician for  
24 FRID withdrawal appropriateness; as well as differences in methodology based on (5) definitions  
25 used for “falls” (e.g., observed vs. self-reported). We assessed the credibility of any apparent  
26 subgroup effects using eleven previously published criteria recommended by the Cochrane  
27 Handbook.[18]  
28  
29  
30  
31  
32  
33  
34  
35  
36  
37  
38  
39

40 A priori sensitivity analyses were conducted to explore the impact of low vs. high RoB  
41 based on blinding and attrition. Studies did not report per-protocol results that would allow for our  
42 planned intention-to-treat vs. per-protocol sensitivity analysis. The impact of using a fixed vs.  
43 random effects model was explored in a post hoc sensitivity analysis.  
44  
45  
46  
47  
48

49 The confidence in effect estimates for each reported outcome was assessed using the  
50 Grading of Recommendations, Assessment, Development and Evaluation (GRADE) approach.[19]  
51  
52  
53  
54  
55  
56  
57  
58  
59  
60

### **Patient and Public Involvement**

Patients and the public were not involved in this review.

### **RESULTS**

Of 819 citations identified, 28 were relevant for full text review and 6 met eligibility criteria ( $\kappa=0.79$ , 95% CI 0.51-1.00, substantial agreement). One study was available as an abstract, but it did not report its falls data.[20] Data was requested from the authors, but we did not receive a response. The PRISMA flow diagram summarizing our search results is shown in Figure 1.

#### **Study Characteristics**

The included trials in our review are described in Table 1.

**Table 1: Characteristics of Included Studies**

| Author,                    | Study Design | Population                                                                                                                                                                                                                                                                                                                                                                                                | Sample Size                                                              | Age, Mean (SD) | Intervention                                                                                                                                                                                                                                                                                                                                                                  | Control                                                                                                                                                                                                                                                                                   | Study Outcomes                                                                                    |
|----------------------------|--------------|-----------------------------------------------------------------------------------------------------------------------------------------------------------------------------------------------------------------------------------------------------------------------------------------------------------------------------------------------------------------------------------------------------------|--------------------------------------------------------------------------|----------------|-------------------------------------------------------------------------------------------------------------------------------------------------------------------------------------------------------------------------------------------------------------------------------------------------------------------------------------------------------------------------------|-------------------------------------------------------------------------------------------------------------------------------------------------------------------------------------------------------------------------------------------------------------------------------------------|---------------------------------------------------------------------------------------------------|
| Blalock et al, 2010 [21]   | RCT          | <ol style="list-style-type: none"> <li>1) Community setting</li> <li>2) Age <math>\geq</math> 65</li> <li>3) Speak, read English</li> <li>4) <math>\geq</math> 4 prescription medications</li> <li>5) <math>\geq</math> 1 high falls-risk medication</li> <li>6) <math>\geq</math> 1 fall not attributable to syncope within 1 year preceding randomization</li> </ol>                                    | 186 (93 I/93 C)                                                          | 74.8 (6.9)     | <ol style="list-style-type: none"> <li>1) Pharmacist medication review</li> <li>2) Physician coordinated medication changes</li> <li>3) Fall brochure, home safety checklist</li> </ol>                                                                                                                                                                                       | <ol style="list-style-type: none"> <li>1) Fall brochure, home safety checklist</li> </ol>                                                                                                                                                                                                 | <ol style="list-style-type: none"> <li>1) Rate of falls</li> <li>2) Incidence of falls</li> </ol> |
| Campbell et al, 1999 [22]  | RCT          | <ol style="list-style-type: none"> <li>1) Community setting</li> <li>2) Age <math>\geq</math> 65</li> <li>3) Using benzodiazepine, other hypnotic, anti-depressant or major tranquilizer</li> <li>4) Ambulatory</li> <li>5) No physiotherapy</li> <li>6) General practitioner thought psychotropic medication withdrawal beneficial</li> </ol>                                                            | 93<br>Arm 1: 24 (I)<br>Arm 2: 24 (I)<br>Arm 3: 21 (C)*<br>Arm 4: 24 (C)* | 74.7 (7.2)     | <u>Arm 1</u><br><ol style="list-style-type: none"> <li>1) Withdrawal of psychotropic medication over 14 weeks</li> <li>2) Placebo substitution</li> <li>3) Home exercise programme</li> </ol> <u>Arm 2</u><br><ol style="list-style-type: none"> <li>1) Psychotropic medication withdrawal</li> <li>2) Placebo substitution</li> <li>3) No home exercise programme</li> </ol> | <u>Arm 3</u><br><ol style="list-style-type: none"> <li>1) No change in psychotropic medication</li> <li>2) Home exercise programme</li> </ol> <u>Arm 4</u><br><ol style="list-style-type: none"> <li>1) No change in psychotropic medication</li> <li>2) No exercise programme</li> </ol> | <ol style="list-style-type: none"> <li>1) Rate of falls</li> <li>2) Incidence of falls</li> </ol> |
| Mott et al, 2016 [23]      | Cluster RCT  | <ol style="list-style-type: none"> <li>1) Community setting</li> <li>2) Age <math>\geq</math> 65</li> <li>3) English-speaking</li> <li>4) Fall in last 12 months/fear falling</li> <li>5) Workshop participation</li> <li>6) Capable of consent</li> </ol>                                                                                                                                                | 80 (39 I/41 C)                                                           | 75.6 (6.5)     | <ol style="list-style-type: none"> <li>1) FRID pharmacist review</li> <li>2) Medication-related action plan (MAP) developed by pharmacist for patient</li> <li>3) Pharmacist follow-up</li> <li>4) Patient given pamphlet</li> <li>5) describing the role of medications in falls and monthly falls calendars</li> </ol>                                                      | <ol style="list-style-type: none"> <li>1) Medications in falls pamphlet</li> </ol>                                                                                                                                                                                                        | <ol style="list-style-type: none"> <li>1) Rate of falls</li> <li>2) Incidence of falls</li> </ol> |
| Patterson et al, 2010 [24] | Cluster RCT  | <ol style="list-style-type: none"> <li>1) Nursing home setting with <math>\geq</math> 30 beds; not exclusive care of terminally ill</li> <li>2) Age <math>\geq</math> 65</li> </ol>                                                                                                                                                                                                                       | 334 (173 I/161 C)                                                        | 82.7 (8.4)     | <ol style="list-style-type: none"> <li>1) Monthly medication review via pharmacist for appropriateness</li> <li>2) Nurse and prescriber collaboration to improve medications</li> </ol>                                                                                                                                                                                       | <ol style="list-style-type: none"> <li>1) Usual care</li> </ol>                                                                                                                                                                                                                           | <ol style="list-style-type: none"> <li>1) Rate of falls</li> </ol>                                |
| Boyé et al, 2017 [12]      | RCT          | <ol style="list-style-type: none"> <li>1) Acute care emergency department setting; attended due to fall incident</li> <li>2) Age <math>\geq</math> 65</li> <li>3) <math>\geq</math> 1 FRID for <math>\geq</math> 2 weeks prior to the fall</li> <li>4) MMSE <math>\geq</math> 21/30</li> <li>5) Ambulates independently</li> <li>6) Community dwelling</li> <li>7) Informed consent by patient</li> </ol> | 612 (319 I/293 C)                                                        | 80.2 (7.3)     | <ol style="list-style-type: none"> <li>1) Investigator conducted FRID assessment, proposed changes</li> <li>2) Changes discussed with geriatrician and general practitioner/prescribing doctor</li> <li>3) If consensus, FRID discontinued, reduced dosage, substituted for potentially safer option</li> </ol>                                                               | <ol style="list-style-type: none"> <li>1) Usual care</li> </ol>                                                                                                                                                                                                                           | <ol style="list-style-type: none"> <li>1) Rate of falls</li> <li>2) Incidence of falls</li> </ol> |

Abbreviations: FRID = Fall-risk-increasing drug, I = Intervention, C = Control

\* Arm 3 and Arm 4 classified as controls due to lack of FRID withdrawal in these arms of the factorial design

1  
2  
3  
4  
5  
6  
7  
8  
9  
10  
11  
12  
13  
14  
15  
16  
17  
18  
19  
20  
21  
22  
23  
24  
25  
26  
27  
28  
29  
30  
31  
32  
33  
34  
35  
36  
37  
38  
39  
40  
41  
42  
43  
44  
45  
46  
47

For peer review only

1  
2  
3 Three studies were individually randomized, while two studies were cluster randomized by either  
4 nursing home or health centre. Studies ranged in size from 80 to 612 participants. With exception  
5 of one study[23], studies were multi-centre involving 144 sites and 4 countries. All were conducted  
6 in the community setting except for one conducted in long-term care.[24] Follow-up periods  
7 ranged from 6 to 12 months.  
8  
9

10  
11 Overall, there were 1305 participants across all trials. Most were female (>70%) and had a  
12 falls history (78.9%). Several key confounders were not reported in the studies including: (1)  
13 baseline number and types of FRIDs, (2) baseline number of medications, and (3) baseline number  
14 and types of co-morbidities. All these factors are thought to potentially modify falls risk.[25,26]  
15  
16

17 All interventions included a preceding assessment for FRID deprescribing appropriateness.  
18 This was conducted by physicians in 2 trials and pharmacists in 3 trials. Three trials tried to  
19 withdraw any FRID, while others focused on sedative-hypnotics, antipsychotics, or  
20 antidepressants. Successful discontinuation and adherence to deprescribing protocols were low in  
21 all studies. Rates of complete discontinuation of at least one FRID ranged from 10 to 40%.  
22  
23

24 In terms of our study outcomes, 4 trials measured the rate of falls and 4 measured falls  
25 incidence. One trial reported fall-related injuries.[21] Fall-related fractures, fall-related  
26 hospitalization or deprescribing-related adverse effects were not measured by any of the trials.  
27  
28  
29  
30  
31  
32

## 33 34 35 36 37 38 39 40 41 42 43 44 **Summary of Findings**

### 45 46 47 **Rate and Incidence of Falls**

48  
49 Four studies reported the effect of deprescribing FRIDs on the rate of falls. Deprescribing  
50 FRIDs did not reduce the rate of falling (RaR 0.98, 95% CI 0.63 to 1.51; Figure 2 – Analysis 1.1).  
51  
52  
53  
54  
55  
56  
57  
58  
59  
60



1  
2  
3 Considerable statistical heterogeneity was present ( $\chi^2=17.47$ ,  $p=0.0006$ ,  $I^2=83\%$ ) and subsequently  
4 explored in subgroup analysis.  
5  
6

7  
8 Four studies reported the effect of deprescribing FRIDs on the risk of falls as measured by  
9 falls incidence. Deprescribing FRIDs did not reduce the incidence of falls (RR 1.04, 95% CI 0.86  
10 to 1.26,  $I^2 = 19\%$ ,  $\chi^2=3.70$ ,  $p = 0.30$ ; Figure 2 – Analysis 2.1). In absolute terms, there was a non-  
11 significant risk difference increase of 0.01 (95% CI -0.06 to 0.09,  $I^2 = 22\%$ ,  $p=0.76$ ; Figure 2 –  
12 Analysis 2.2)  
13  
14  
15  
16  
17  
18

### 19 20 21 ***Rate of Injurious Falls*** 22

23  
24 One trial reported the effect of deprescribing FRIDs on fall-related injuries.[21]  
25 Deprescribing FRIDs did not reduce the rate of fall-related injuries (RaR 0.89, 95% CI 0.57 to  
26 1.39; Figure 2 – Analysis 3.1). This trial did not report data that would allow for any of our pre-  
27 planned subgroup analyses.  
28  
29  
30  
31  
32

### 33 34 35 **Risk of Bias Assessment** 36

37  
38 Figure 3 summarizes our RoB assessments. All studies were deemed high risk of bias in at  
39 least one domain. The overall mean weighted kappa across all assessments was 0.67 (moderate  
40 agreement). For individual RoB assessments, kappa ranged from 0 to 0.85. Inter-rater agreement  
41 is actually higher than indicated by the calculated scores due the “kappa co-efficient  
42 paradox”. [27,28] Low kappas (e.g.  $\kappa=0$ ) occurred despite high levels of observed agreement (e.g.  
43  $\geq 80\%$  agreement) for two RoB assessments. True agreement is falsely attributed to chance  
44 agreement by the kappa calculation when there is substantial imbalance in marginal ratings.  
45  
46  
47  
48  
49  
50  
51  
52  
53  
54  
55  
56  
57  
58  
59  
60

### ***Publication Bias***

Since less than 10 eligible studies were found, a funnel plot was not constructed due to an inability to make meaningful conclusions about publication bias.

### ***Subgroup Analyses and Exploration of Heterogeneity***

Our pre-specified subgroup analyses did not adequately explain the statistical heterogeneity observed results for the rate and incidence of falls (Supplementary Figure S2). Deprescribing FRIDs appeared more effective when a preceding medication review was conducted by physicians compared to pharmacists ( $p=0.0004$ ,  $I^2=91.9\%$ , Analysis 1.5), while psychotropic withdrawal appeared more effective than strategies withdrawing any FRID ( $p=0.08$ ,  $I^2=67.8\%$ , Analysis 2.3). However, in both analyses, only 6 of 11 subgroup credibility criteria were met and each subgroup was limited to one trial with less than 100 participants (Supplementary Table S2). We therefore judged the credibility that these subgroup effects are real as poor and uncertain.

The available data did not permit subgroup analyses by place of residence or falls ascertainment method. The other subgroup analyses showed no evidence of difference beyond that due to chance.

### ***Sensitivity Analyses***

Our sensitivity analyses are shown in Supplementary Figure S3. The incorporation of trials with high risk of performance bias appeared to mask the potential benefit of deprescribing FRIDs on reducing the incidence and rate of falls, while the trials with high risk of attrition bias appeared to mask a potential increase in falls rate with deprescribing FRIDs. These results should be interpreted cautiously and definitive conclusions cannot be made. Data from trials with low risk

1  
2  
3 of performance bias were limited to one trial with less than 100 participants, and data from trials with  
4  
5 low risk of attrition bias were limited to two trials with less than 450 participants overall.  
6

7  
8 A post-hoc sensitivity analysis examining the impact of using a fixed vs. random effects  
9  
10 model did not change conclusions regarding the effect of de-prescribing FRIDs on the rate or  
11  
12 incidence of falls.  
13

### 14 15 16 17 **Quality of Evidence**

18  
19 The GRADE evidence profile is shown in Table 2.  
20  
21  
22  
23  
24  
25  
26  
27  
28  
29  
30  
31  
32  
33  
34  
35  
36  
37  
38  
39  
40  
41  
42  
43  
44  
45  
46  
47  
48  
49  
50  
51  
52  
53  
54  
55  
56  
57  
58  
59  
60

**Table 2: GRADE Quality of Evidence Assessment**

| Certainty assessment  |                   |                      |                      |              |                      |                      | № of patients               |                    | Effect                                   |                   | Certainty        | Importance |
|-----------------------|-------------------|----------------------|----------------------|--------------|----------------------|----------------------|-----------------------------|--------------------|------------------------------------------|-------------------|------------------|------------|
| № of studies          | Study design      | Risk of bias         | Inconsistency        | Indirectness | Imprecision          | Other considerations | FRID deprescribing strategy | usual care         | Relative (95% CI)                        | Absolute (95% CI) |                  |            |
| Falls Rate            |                   |                      |                      |              |                      |                      |                             |                    |                                          |                   |                  |            |
| 4                     | randomised trials | serious <sup>a</sup> | serious <sup>b</sup> | not serious  | serious <sup>c</sup> | none                 | 353                         | 340                | <b>Rate ratio 0.98</b><br>(0.63 to 1.51) | -                 | ⊕○○○<br>VERY LOW | IMPORTANT  |
| Falls Incidence       |                   |                      |                      |              |                      |                      |                             |                    |                                          |                   |                  |            |
| 4                     | randomised trials | serious <sup>a</sup> | serious <sup>d</sup> | not serious  | serious <sup>c</sup> | none                 | 190/499<br>(38.1%)          | 170/472<br>(36.0%) | <b>RR 1.04</b><br>(0.86 to 1.26)         | -                 | ⊕○○○<br>VERY LOW | IMPORTANT  |
|                       |                   |                      |                      |              |                      |                      |                             | 33.7%              |                                          |                   |                  |            |
| Fall-Related Injuries |                   |                      |                      |              |                      |                      |                             |                    |                                          |                   |                  |            |
| 1                     | randomised trials | serious <sup>a</sup> | not serious          | not serious  | serious <sup>c</sup> | none                 | 93                          | 93                 | <b>Rate ratio 0.89</b><br>(0.57 to 1.39) | -                 | ⊕⊕○○<br>LOW      | CRITICAL   |

1  
2  
3 We judged the quality of evidence to be low or very low for all outcomes (falls rates, falls incidence  
4 and fall-related injuries) after rating down for risk of bias, inconsistency and imprecision.  
5  
6

7  
8 We believe the optimal information size (OIS) to make definitive conclusions on the effect  
9  
10 of deprescribing FRIDs has not yet been met as the body of evidence is based on fewer than 2000  
11 participants and less than 400 events.[29,30] This is based on the OIS calculation figure  
12 recommended by the GRADE guidelines using a well-established control falls event rate of 30%  
13 described in the literature and conservative relative risk reduction (RRR) of 20% (assuming  $\alpha =$   
14 0.05 and  $\beta = 0.2$ ).[30,31]  
15  
16  
17  
18  
19  
20  
21  
22  
23

## 24 **DISCUSSION**

25  
26 This systematic review found that there is a lack of robust high-quality evidence to support  
27 or refute the deprescribing of FRIDs as an effective fall prevention strategy. Incorporating data  
28 from 5 RCTs involving 1305 participants aged  $\geq 65$  years, our meta-analyses indicate that a FRID  
29 deprescribing strategy did not significantly change the rate of falls (RaR 0.98, 95% CI 0.63 to  
30 1.51) nor the risk of falling (RD 0.01, 95% CI -0.06 to 0.09) over a 6 to 12-month follow-up period.  
31 Although the intervention focused on those medications thought to be associated with falls, the  
32 results and conclusions are similar to previous systematic reviews evaluating the effect of generic  
33 (non-FRID focused) medication reviews.[32]  
34  
35  
36  
37  
38  
39  
40  
41  
42  
43

44  
45 There is also a significant absence of evidence for clinically- and patient-important  
46 outcomes such as fall-related injuries, fractures and hospitalizations. The only trial to date that  
47 evaluated the rate of fall-related injuries did not demonstrate a statistically significant effect (RaR  
48 0.89, 95% CI 0.57-1.39).[21] Our search found no trials measuring the impact on fall-related  
49 fractures, fall-related hospitalizations or adverse effects related to a FRID deprescribing strategy.  
50  
51  
52  
53  
54  
55  
56  
57  
58  
59  
60

1  
2  
3 Based on low-quality evidence, it is unclear whether deprescribing FRIDs leads to any  
4 appreciable clinically important benefit or harm. In fact, our current best effect estimates for falls  
5 rate and incidence are centred around no appreciable difference (i.e.  $RaR \approx 1$ ,  $RR \approx 1$ ,  $RD \approx 0$ ).  
6  
7 Although seemingly logical to assume, reducing risk factors may not necessarily lead to reduction  
8 in falls and fall-related complications. The absence of change in the incidence of hip fractures after  
9  
10 statewide regulatory action on benzodiazepine prescribing in the United States that reduced  
11 benzodiazepine use by 60.3% is a real-world example of this phenomena and the complexity of  
12 exposure-outcome relationships.[33] Furthermore, it is unclear as to what degree a particular risk  
13 factor or combination of risk factors (e.g. specific FRIDs) must be reduced to produce an  
14 appreciable change in falls. This likely reflects the multi-factorial nature of falls and the varying  
15 risk of different FRIDs.  
16  
17  
18  
19  
20  
21  
22  
23  
24  
25  
26  
27

28 Only one trial[22] included in our review demonstrated a statistically significant benefit  
29 with deprescribing FRIDs. This was also the only trial to use study capsules to operationalize  
30 blinded deprescribing of FRIDs in participants, research personnel and outcome assessors. Its  
31 results might be more reflective of the potential effect of deprescribing FRIDs. However, the  
32 magnitude of benefit achievable in the “real world” setting may be closer to those seen in the  
33 unblinded trials due to the strong mitigating factors preventing successful deprescribing.  
34  
35  
36  
37  
38  
39  
40  
41

42 These results raise several questions about current practice and the presumed effectiveness  
43 of deprescribing FRIDs as a falls prevention strategy. Given the amount of resources being  
44 invested into falls prevention initiatives around the world, clinicians and organizations should re-  
45 examine: (1) what is the strength of evidence supporting their current activities, (2) whether these  
46 activities are cost-effective, and (3) whether resources are being appropriately prioritized to those  
47 interventions shown to provide the most value. This should also be applied to what is being  
48  
49  
50  
51  
52  
53  
54  
55  
56  
57  
58  
59  
60

1  
2  
3 required of healthcare organizations in national accreditation standards (e.g. Joint Commission,  
4 Accreditation Canada) to help direct and encourage optimal use of limited healthcare resources.  
5  
6

7  
8 Clinicians and policy-makers should acknowledge the lack of strong evidence for this  
9  
10 intervention for the specific purpose of reducing falls, particularly in patients who may be very  
11  
12 reluctant or who have strong indications for specific FRIDs. As with prescribing medications,  
13  
14 deprescribing is a skill and comes with the potential for harm as well as benefit.[34] Thoughtful  
15  
16 consideration of the goals, appropriateness and safety of deprescribing is important. Despite  
17  
18 insufficient evidence to support or refute the deprescribing of FRIDs for falls prevention, it should  
19  
20 be noted that there may be other reasons to deprescribe these medications. These include avoidance  
21  
22 of adverse drug events, improvements in cognition, increased medication adherence and drug costs  
23  
24 savings.  
25  
26

27  
28 Our review highlights the need for future FRID deprescribing trials that evaluate patient-  
29  
30 important outcomes (e.g. injuries, fractures and hospitalizations). Greater attention to optimal  
31  
32 design and reporting is needed to minimize risk of bias. Examples include improved reporting of  
33  
34 confounding baseline characteristics and intervention fidelity (e.g. number and types of FRIDs,  
35  
36 degree and duration of dose reduction). Deprescribing is challenging and extra measures are likely  
37  
38 needed to improve successful intervention adherence and follow-up.  
39  
40  
41  
42  
43

#### 44 **STRENGTHS AND LIMITATIONS**

45  
46  
47 Our review has limitations. There was variation in the operationalization of FRID  
48  
49 deprescribing and degree of success achieved (e.g. dose reduction only, completion  
50  
51 discontinuation, non-adherence). This presumably makes the detection of any potential benefit less  
52  
53 likely and our conclusions more conservative. However, the effect estimates are likely more  
54  
55  
56  
57  
58  
59  
60

1  
2  
3 indicative of what might be expected outside of the research setting. These phenomena likely  
4 represent the real-life challenges of deprescribing (especially with certain types of FRIDs such as  
5 psychotropics or opioids). Moreover, our ability to assess for confounders modifying falls risk was  
6 limited due to inconsistent reporting of relevant baseline characteristics and lack of patient-level  
7 data. Lastly, our ability to make definitive conclusions is limited because the total sample size  
8 across studies for each outcome did not yet meet our calculated estimate for the required optimal  
9 information size.  
10  
11  
12  
13  
14  
15  
16  
17  
18

19 Our review has several strengths. First, our search was comprehensive and we included a  
20 rigorous grey literature search for unpublished studies. Second, we employed optimal analytical  
21 and interpretational approaches including duplicate assessment, subgroup credibility criteria and  
22 optimal information size considerations. Third, unlike previous medication-focused reviews, we  
23 applied the GRADE approach to assess the quality of evidence and our degree of confidence in  
24 the results.  
25  
26  
27  
28  
29  
30  
31  
32  
33  
34

## 35 CONCLUSIONS

36  
37 Our systematic review found that deprescribing FRIDs results in little to no difference in  
38 the rate and risk of falls or falls-related injuries, but the evidence is still sparse and very low quality.  
39 Additional well-designed studies are needed to reach the optimal information size to reduce  
40 uncertainty about this intervention and establish its relative importance in the range of possible  
41 interventions that can be employed by clinicians and health systems to reduce falls.  
42  
43  
44  
45  
46  
47  
48  
49  
50

## 51 Acknowledgements:



1  
2  
3 The authors would like to thank Lois Cottrell, medical librarian at St. Joseph's Healthcare  
4 Hamilton, Charlton Campus, Hamilton, Ontario, Canada and Andrea McLellan, Head of  
5 Collection and Technical Services, School of Medicine liaison, at McMaster University, Hamilton,  
6 Ontario, Canada, for their assistance with the development of the search strategy.  
7  
8  
9  
10  
11  
12  
13  
14

#### 15 **Author Contributions:**

16  
17 JL conceptualized the study. JL and AH designed and developed the protocol. RP and EW assisted  
18 with citation review. RP and AN assisted with data extraction, risk of bias assessment and certainty  
19 of evidence grading. All authors contributed to the analysis and interpretation of results. JL drafted  
20 the initial manuscript and all authors contributed to its revision and final approval.  
21  
22  
23  
24  
25  
26  
27

#### 28 **Funding:**

29  
30 This research received no specific grant from any funding agency in the public, commercial or  
31 not-for-profit sectors.  
32  
33  
34  
35  
36  
37

#### 38 **Competing Interests:**

39  
40 The authors have no potential conflicts of interest to declare.  
41  
42  
43

#### 44 **Patient Consent for Publication:**

45  
46 None required.  
47  
48  
49  
50

#### 51 **Data Sharing Statement:**

52  
53 No unpublished data are available.  
54  
55  
56  
57  
58  
59  
60

**REFERENCES:**

- 1 Hill KD, Wee R. Psychotropic drug-induced falls in older people: a review of interventions aimed at reducing the problem. *Drugs Aging* 2012;**29**:15–30. doi:10.2165/11598420-000000000-00000
- 2 Florence CS, Bergen G, Atherly A, *et al.* Medical Costs of Fatal and Nonfatal Falls in Older Adults. *J Am Geriatr Soc* 2018;**66**:693–8. doi:10.1111/jgs.15304
- 3 National Institute for Health and Care Excellence. Falls in older people: assessing risk and prevention. 2013.
- 4 Public Health Agency of Canada. Seniors' Falls in Canada. 2014.
- 5 Summary of the Updated American Geriatrics Society/British Geriatrics Society clinical practice guideline for prevention of falls in older persons. *J Am Geriatr Soc* 2011;**59**:148–57. doi:10.1111/j.1532-5415.2010.03234.x
- 6 Guirguis-Blake JM, Michael YL, Perdue LA, *et al.* Interventions to Prevent Falls in Older Adults. *JAMA* 2018;**319**:1705. doi:10.1001/jama.2017.21962
- 7 Campbell AJ, Robertson MC. Fall Prevention: Single or Multiple Interventions? Single Interventions for Fall Prevention. *J Am Geriatr Soc* 2013;**61**:281–4. doi:10.1111/jgs.12095\_2
- 8 Tricco AC, Thomas SM, Veroniki AA, *et al.* Comparisons of Interventions for Preventing Falls in Older Adults. *JAMA* 2017;**318**:1687. doi:10.1001/jama.2017.15006
- 9 Leipzig RM, Cumming RG, Tinetti ME. Drugs and falls in older people: a systematic review and meta-analysis: I. Psychotropic drugs. *J Am Geriatr Soc* 1999;**47**:30–9.
- 10 Leipzig RM, Cumming RG, Tinetti ME. Drugs and falls in older people: a systematic review and meta-analysis: II. Cardiac and analgesic drugs. *J Am Geriatr Soc* 1999;**47**:40–

- 1  
2  
3 50.  
4  
5  
6 11 Woolcott JC, Richardson KJ, Wiens MO, *et al.* Meta-analysis of the impact of 9  
7 medication classes on falls in elderly persons. *Arch Intern Med* 2009;**169**:1952–60.  
8  
9  
10 doi:10.1001/archinternmed.2009.357  
11  
12 12 Boyé NDA, van der Velde N, de Vries OJ, *et al.* Effectiveness of medication withdrawal  
13 in older fallers: results from the Improving Medication Prescribing to reduce Risk Of  
14 FALLs (IMPROveFALL) trial. *Age Ageing* 2017;**46**:142–6. doi:10.1093/ageing/afw161  
15  
16  
17 13 The Cochrane Collaboration. *Cochrane Handbook for Systematic Reviews of Interventions*  
18  
19  
20  
21  
22  
23  
24 14 Moher D, Liberati A, Tetzlaff J, *et al.* Preferred reporting items for systematic reviews and  
25 meta-analyses: the PRISMA statement. *Ann Intern Med* 2009;**151**:264–9, W64.  
26  
27  
28 15 Lee JY, Holbrook A. The efficacy of fall-risk-increasing drug (FRID) withdrawal for the  
29 prevention of falls and fall-related complications: protocol for a systematic review and  
30 meta-analysis. *Syst Rev* 2017;**6**:33.  
31  
32  
33  
34  
35 16 Higgins JPT, Altman DG, Gøtzsche PC, *et al.* The Cochrane Collaboration’s tool for  
36 assessing risk of bias in randomised trials. *BMJ* 2011;**343**:d5928.  
37  
38  
39 17 Akl EA, Sun X, Busse JW, *et al.* Specific instructions for estimating unclearly reported  
40 blinding status in randomized trials were reliable and valid. *J Clin Epidemiol*  
41  
42  
43  
44  
45  
46 2012;**65**:262–7. doi:10.1016/j.jclinepi.2011.04.015  
47  
48 18 Sun X, Briel M, Walter SD, *et al.* Is a subgroup effect believable? Updating criteria to  
49 evaluate the credibility of subgroup analyses. *BMJ* 2010;**340**:c117.  
50  
51  
52 19 Guyatt G, Oxman AD, Akl EA, *et al.* GRADE guidelines: 1. Introduction-GRADE  
53 evidence profiles and summary of findings tables. *J Clin Epidemiol* 2011;**64**:383–94.  
54  
55  
56  
57  
58  
59  
60

- 1  
2  
3 20 Streim JE, Filippo S, Have T, *et al.* Antidepressant discontinuation associated with  
4 cognitive decline in older adult residents of long-term care facilities. *Am J Geriatr*  
5 *psychiatry* 2012;**20**:S147–8. doi:10.1097/01.JGP.0000413064.91948.aa  
6  
7  
8  
9  
10 21 Blalock SJ, Casteel C, Roth MT, *et al.* Impact of enhanced pharmacologic care on the  
11 prevention of falls: a randomized controlled trial. *Am J Geriatr Pharmacother*  
12 2010;**8**:428–40. doi:10.1016/j.amjopharm.2010.09.002  
13  
14  
15  
16  
17 22 Campbell AJ, Robertson MC, Gardner MM, *et al.* Psychotropic medication withdrawal  
18 and a home-based exercise program to prevent falls: a randomized, controlled trial. *J Am*  
19 *Geriatr Soc* 1999;**47**:850–3.  
20  
21  
22  
23  
24 23 Mott DA, Martin B, Breslow R, *et al.* Impact of a medication therapy management  
25 intervention targeting medications associated with falling: Results of a pilot study. *J Am*  
26 *Pharm Assoc (2003)* 2016;**56**:22–8.  
27  
28  
29  
30  
31 24 Patterson SM, Hughes CM, Crealey G, *et al.* An evaluation of an adapted U.S. model of  
32 pharmaceutical care to improve psychoactive prescribing for nursing home residents in  
33 northern ireland (fleetwood northern ireland study). *J Am Geriatr Soc* 2010;**58**:44–53.  
34  
35  
36  
37  
38  
39  
40 25 Tinetti M, Kumar C. The Patient Who Falls. *JAMA J Am Med Assoc* 2010;**303**:273–4.  
41  
42  
43  
44  
45 26 Chen Y, Zhu L-L, Zhou Q. Effects of drug pharmacokinetic/pharmacodynamic properties,  
46 characteristics of medication use, and relevant pharmacological interventions on fall risk  
47 in elderly patients. *Ther Clin Risk Manag* 2014;**10**:437–48. doi:10.2147/TCRM.S63756  
48  
49  
50  
51 27 Feinstein AR, Cicchetti D V. High agreement but low kappa: I. The problems of two  
52 paradoxes. *J Clin Epidemiol* 1990;**43**:543–9.  
53  
54  
55  
56  
57  
58  
59  
60

- 1  
2  
3 28 Tang W, Hu J, Zhang H, *et al.* Kappa coefficient: a popular measure of rater agreement.  
4  
5 *Shanghai Arch psychiatry* 2015;**27**:62–7. doi:10.11919/j.issn.1002-0829.215010  
6  
7  
8 29 Ioannidis J, Lau J. Evolution of treatment effects over time: empirical insight from  
9  
10 recursive cumulative metaanalyses. *Proc Natl Acad Sci U S A* 2001;**98**:831–6.  
11  
12 doi:10.1073/pnas.021529998  
13  
14  
15 30 Guyatt GH, Oxman AD, Kunz R, *et al.* GRADE guidelines 6. Rating the quality of  
16  
17 evidence--imprecision. *J Clin Epidemiol* 2011;**64**:1283–93.  
18  
19 doi:10.1016/j.jclinepi.2011.01.012  
20  
21  
22 31 O'Loughlin JL, Robitaille Y, Boivin JF, *et al.* Incidence of and risk factors for falls and  
23  
24 injurious falls among the community-dwelling elderly. *Am J Epidemiol* 1993;**137**:342–54.  
25  
26  
27 32 Gillespie LD, Robertson MC, Gillespie WJ, *et al.* Interventions for preventing falls in  
28  
29 older people living in the community. *Cochrane database Syst Rev* 2012;**9**:CD007146.  
30  
31 doi:10.1002/14651858.CD007146.pub3  
32  
33  
34 33 Wagner AK, Ross-Degnan D, Gurwitz JH, *et al.* Effect of New York State regulatory  
35  
36 action on benzodiazepine prescribing and hip fracture rates. *Ann Intern Med* 2007;**146**:96–  
37  
38 103.  
39  
40  
41 34 Reeve E, Moriarty F, Nahas R, *et al.* A narrative review of the safety concerns of  
42  
43 deprescribing in older adults and strategies to mitigate potential harms. *Expert Opin Drug*  
44  
45 *Saf* 2018;**17**:39–49. doi:10.1080/14740338.2018.1397625  
46  
47  
48  
49  
50  
51  
52  
53  
54  
55  
56  
57  
58  
59  
60

1  
2  
3 **FIGURES**  
4

5 **Figure 1:** PRISMA Flow Diagram of Study Selection Process  
6

7 **Figure 2:** Forest Plots of FRID Withdrawal versus Usual Care  
8

9 **Figure 3:** Risk of Bias Assessments  
10  
11  
12  
13  
14  
15  
16  
17  
18  
19  
20  
21  
22  
23  
24  
25  
26  
27  
28  
29  
30  
31  
32  
33  
34  
35  
36  
37  
38  
39  
40  
41  
42  
43  
44  
45  
46  
47  
48  
49  
50  
51  
52  
53  
54  
55  
56  
57  
58  
59  
60

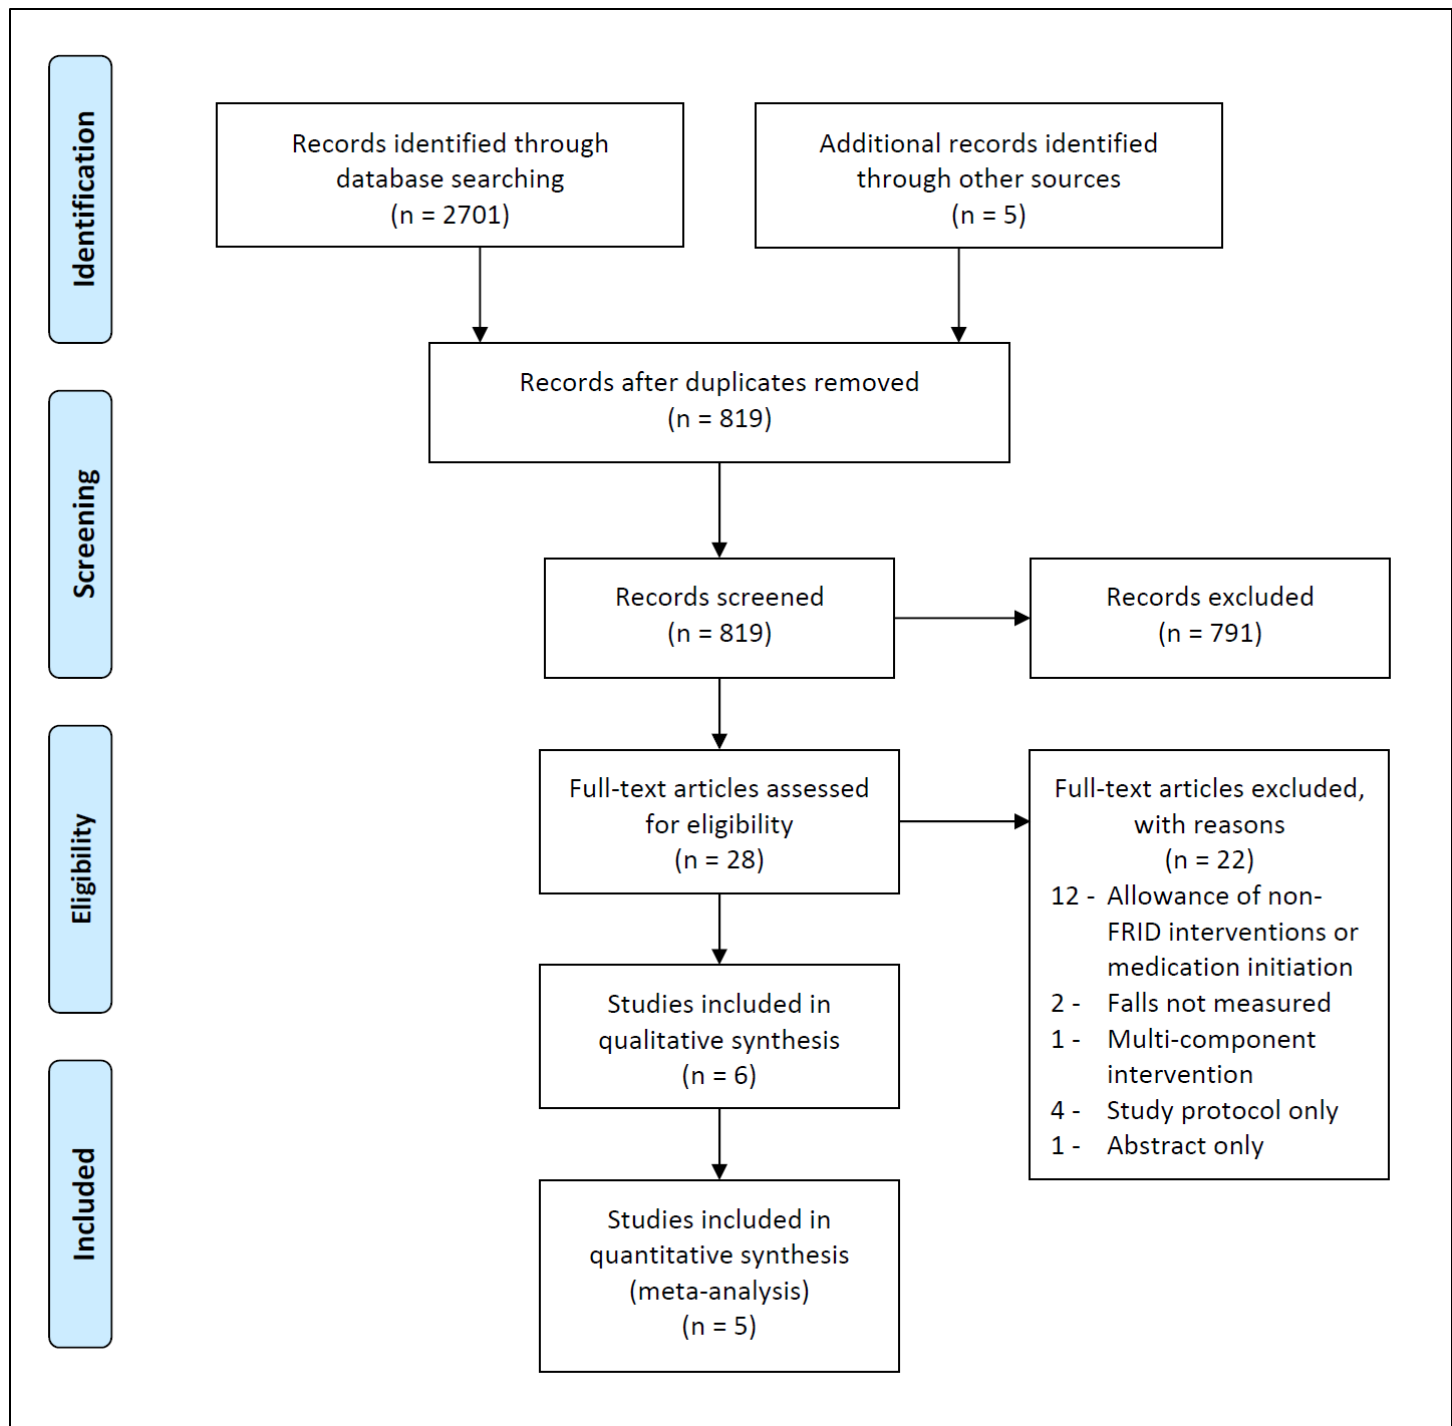

### 1.1 Falls Rate

1  
2  
3  
4  
5  
6  
7  
8  
9  
10  
11  
12  
13  
14  
15  
16  
17  
18  
19  
20  
21  
22  
23  
24  
25  
26  
27  
28  
29  
30  
31  
32  
33  
34  
35  
36  
37  
38  
39  
40  
41  
42  
43  
44  
45  
46  
47  
48  
49  
50  
51  
52

| Study or Subgroup     | FRID Withdrawal |        | Usual Care |            | Weight        | Rate Ratio         |                     | Year |
|-----------------------|-----------------|--------|------------|------------|---------------|--------------------|---------------------|------|
|                       | log[Rate Ratio] | SE     | Total      | Total      |               | IV, Random, 95% CI | Year                |      |
| Campbell 1999         | -0.8023         | 0.2434 | 48         | 45         | 23.4%         | 0.45               | [0.28, 0.72]        | 1999 |
| Patterson 2010        | 0.3549          | 0.1465 | 173        | 161        | 28.4%         | 1.43               | [1.07, 1.90]        | 2010 |
| Blalock 2010          | 0.003           | 0.1117 | 93         | 93         | 29.9%         | 1.00               | [0.81, 1.25]        | 2010 |
| Mott 2016             | 0.3379          | 0.3416 | 39         | 41         | 18.4%         | 1.40               | [0.72, 2.74]        | 2016 |
| <b>Total (95% CI)</b> |                 |        | <b>353</b> | <b>340</b> | <b>100.0%</b> | <b>0.98</b>        | <b>[0.63, 1.51]</b> |      |

Heterogeneity: Tau<sup>2</sup> = 0.15; Chi<sup>2</sup> = 17.47, df = 3 (P = 0.0006); I<sup>2</sup> = 83%  
Test for overall effect: Z = 0.11 (P = 0.92)

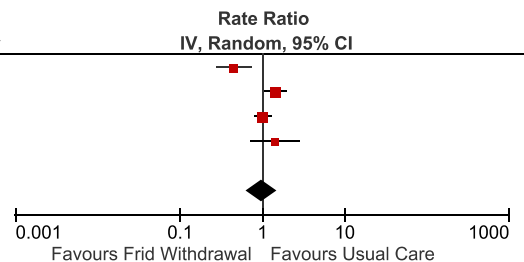

### 2.1 Falls Incidence – Risk Ratio

| Study or Subgroup     | FRID Withdrawal |            | Usual Care |            | Weight        | Risk Ratio          |                     |
|-----------------------|-----------------|------------|------------|------------|---------------|---------------------|---------------------|
|                       | Events          | Total      | Events     | Total      |               | M-H, Random, 95% CI | M-H, Random, 95% CI |
| Campbell 1999         | 11              | 48         | 17         | 45         | 8.4%          | 0.61                | [0.32, 1.15]        |
| Blalock 2010          | 53              | 93         | 52         | 93         | 39.3%         | 1.02                | [0.79, 1.31]        |
| Mott 2016             | 11              | 39         | 10         | 41         | 6.4%          | 1.16                | [0.55, 2.41]        |
| Boyé 2017             | 115             | 319        | 91         | 293        | 45.9%         | 1.16                | [0.93, 1.45]        |
| <b>Total (95% CI)</b> |                 | <b>499</b> |            | <b>472</b> | <b>100.0%</b> | <b>1.04</b>         | <b>[0.86, 1.26]</b> |

Total events: FRID Withdrawal = 190, Usual Care = 170  
Heterogeneity: Tau<sup>2</sup> = 0.01; Chi<sup>2</sup> = 3.70, df = 3 (P = 0.30); I<sup>2</sup> = 19%  
Test for overall effect: Z = 0.44 (P = 0.66)

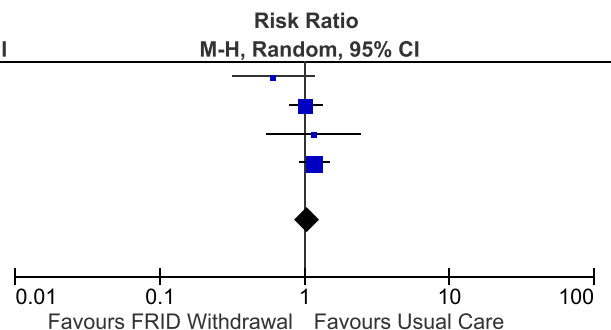

### 2.2 Falls Incidence – Risk Difference

| Study or Subgroup     | FRID Withdrawal |            | Usual Care |            | Weight        | Risk Difference     |                      |
|-----------------------|-----------------|------------|------------|------------|---------------|---------------------|----------------------|
|                       | Events          | Total      | Events     | Total      |               | M-H, Random, 95% CI | M-H, Random, 95% CI  |
| Campbell 1999         | 11              | 48         | 17         | 45         | 14.2%         | -0.15               | [-0.33, 0.04]        |
| Blalock 2010          | 53              | 93         | 52         | 93         | 21.8%         | 0.01                | [-0.13, 0.15]        |
| Mott 2016             | 11              | 39         | 10         | 41         | 13.2%         | 0.04                | [-0.15, 0.23]        |
| Boyé 2017             | 115             | 319        | 91         | 293        | 50.9%         | 0.05                | [-0.02, 0.12]        |
| <b>Total (95% CI)</b> |                 | <b>499</b> |            | <b>472</b> | <b>100.0%</b> | <b>0.01</b>         | <b>[-0.06, 0.09]</b> |

Total events: FRID Withdrawal = 190, Usual Care = 170  
Heterogeneity: Tau<sup>2</sup> = 0.00; Chi<sup>2</sup> = 3.86, df = 3 (P = 0.28); I<sup>2</sup> = 22%  
Test for overall effect: Z = 0.31 (P = 0.76)

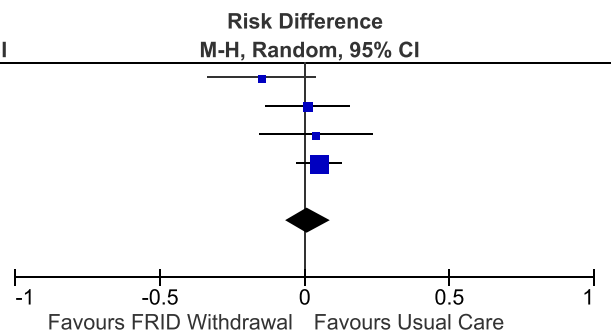

### 3.1 Fall-Related Injuries

| Study or Subgroup     | FRID Withdrawal |        | Usual Care |           | Weight        | Rate Ratio         |                     |      |
|-----------------------|-----------------|--------|------------|-----------|---------------|--------------------|---------------------|------|
|                       | log[Rate Ratio] | SE     | Total      | Total     |               | IV, Random, 95% CI | Year                |      |
| Blalock 2010          | -0.1165         | 0.2273 | 93         | 93        | 100.0%        | 0.89               | [0.57, 1.39]        | 2010 |
| <b>Total (95% CI)</b> |                 |        | <b>93</b>  | <b>93</b> | <b>100.0%</b> | <b>0.89</b>        | <b>[0.57, 1.39]</b> |      |

Heterogeneity: Not applicable  
Test for overall effect: Z = 0.51 (P = 0.61)

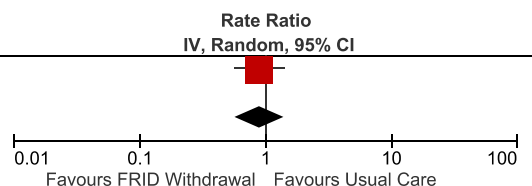



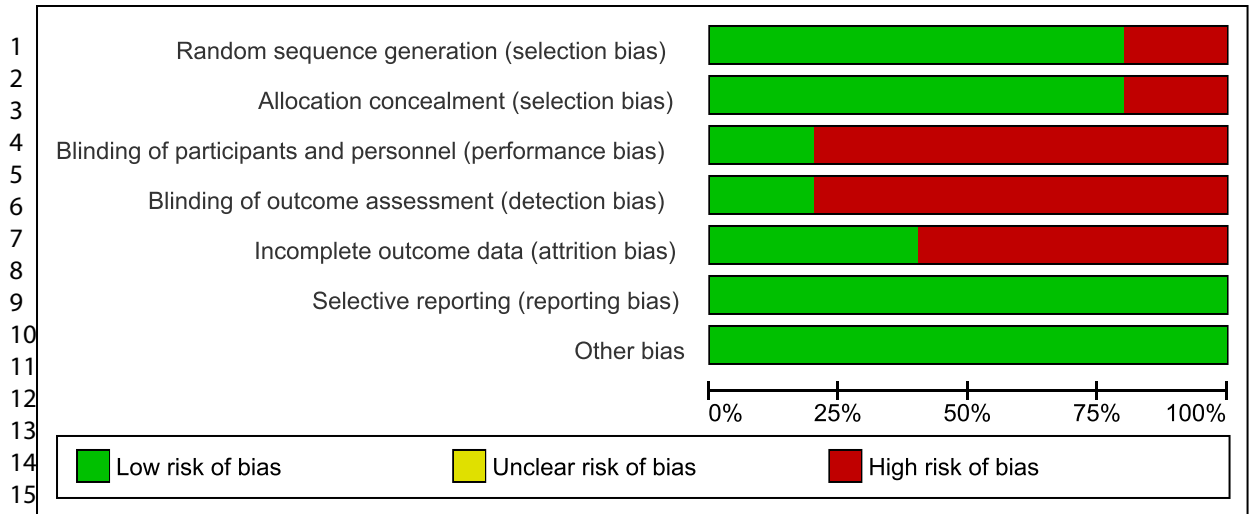

|                   | Random sequence generation (selection bias) | Allocation concealment (selection bias) | Blinding of participants and personnel (performance bias) | Blinding of outcome assessment (detection bias) | Incomplete outcome data (attrition bias) | Selective reporting (reporting bias) | Other bias |
|-------------------|---------------------------------------------|-----------------------------------------|-----------------------------------------------------------|-------------------------------------------------|------------------------------------------|--------------------------------------|------------|
| 38 Blalock 2010   | +                                           | +                                       | -                                                         | -                                               | -                                        | +                                    | +          |
| 39 Boyé 2017      | +                                           | +                                       | -                                                         | -                                               | -                                        | +                                    | +          |
| 40 Campbell 1999  | +                                           | +                                       | +                                                         | +                                               | -                                        | +                                    | +          |
| 41 Mott 2016      | -                                           | -                                       | -                                                         | -                                               | +                                        | +                                    | +          |
| 42 Patterson 2010 | +                                           | +                                       | -                                                         | -                                               | +                                        | +                                    | +          |

## Supplementary Figure S1: OVID Medline Search Strategy

Database(s): OVID Medline Epub Ahead of Print, In-Process & Other Non-Indexed Citations, Ovid MEDLINE(R) Daily and Ovid MEDLINE(R) 1946 to Present  
Search Strategy:

| #  | Searches                                                                                                                                                                                                                                                                                                                                                                                                                                                                                                                   |
|----|----------------------------------------------------------------------------------------------------------------------------------------------------------------------------------------------------------------------------------------------------------------------------------------------------------------------------------------------------------------------------------------------------------------------------------------------------------------------------------------------------------------------------|
| 1  | exp Accidental Falls/pc [Prevention & Control]                                                                                                                                                                                                                                                                                                                                                                                                                                                                             |
| 2  | fall.mp. [mp=title, abstract, original title, name of substance word, subject heading word, floating sub-heading word, keyword heading word, protocol supplementary concept word, rare disease supplementary concept word, unique identifier, synonyms]                                                                                                                                                                                                                                                                    |
| 3  | falls.mp. [mp=title, abstract, original title, name of substance word, subject heading word, floating sub-heading word, keyword heading word, protocol supplementary concept word, rare disease supplementary concept word, unique identifier, synonyms]                                                                                                                                                                                                                                                                   |
| 4  | exp Deprescriptions/                                                                                                                                                                                                                                                                                                                                                                                                                                                                                                       |
| 5  | ((medicat* or drug*) adj3 (deprescrib* or withdraw* or cessat* or stop* or discontin*)) .mp. [mp=title, abstract, original title, name of substance word, subject heading word, floating sub-heading word, keyword heading word, protocol supplementary concept word, rare disease supplementary concept word, unique identifier, synonyms]                                                                                                                                                                                |
| 6  | ((antihypertensive* or diuretic* or beta-blocker* or sedative* or hypnotic* or neuroleptic* or antipsychotic* or antidepressant* or benzodiazepine* or narcotic* or opioid* or narcotic* or NSAID*) adj3 (deprescrib* or withdraw* or cessat* or stop* or discontin*)) .mp. [mp=title, abstract, original title, name of substance word, subject heading word, floating sub-heading word, keyword heading word, protocol supplementary concept word, rare disease supplementary concept word, unique identifier, synonyms] |
| 7  | fall-risk increasing drugs.mp.                                                                                                                                                                                                                                                                                                                                                                                                                                                                                             |
| 8  | FRID.mp.                                                                                                                                                                                                                                                                                                                                                                                                                                                                                                                   |
| 9  | ((medicat* or drug*) adj3 (review* or improv* or program*)) .mp. [mp=title, abstract, original title, name of substance word, subject heading word, floating sub-heading word, keyword heading word, protocol supplementary concept word, rare disease supplementary concept word, unique identifier, synonyms]                                                                                                                                                                                                            |
| 10 | exp "Drug-Related Side Effects and Adverse Reactions"/pc [Prevention & Control]                                                                                                                                                                                                                                                                                                                                                                                                                                            |
| 11 | exp Medication Therapy Management/ or exp "Drug Utilization Review"/                                                                                                                                                                                                                                                                                                                                                                                                                                                       |
| 12 | 4 or 5 or 6 or 7 or 8 or 9 or 10 or 11                                                                                                                                                                                                                                                                                                                                                                                                                                                                                     |
| 13 | 1 or 2 or 3                                                                                                                                                                                                                                                                                                                                                                                                                                                                                                                |
| 14 | 12 and 13                                                                                                                                                                                                                                                                                                                                                                                                                                                                                                                  |
| 15 | remove duplicates from 14                                                                                                                                                                                                                                                                                                                                                                                                                                                                                                  |
| 16 | exp Clinical Trial/                                                                                                                                                                                                                                                                                                                                                                                                                                                                                                        |
| 17 | (randomized or randomised).ab,ti.                                                                                                                                                                                                                                                                                                                                                                                                                                                                                          |
| 18 | placebo.ab,ti.                                                                                                                                                                                                                                                                                                                                                                                                                                                                                                             |
| 19 | randomly.ab,ti.                                                                                                                                                                                                                                                                                                                                                                                                                                                                                                            |
| 20 | groups.ab,ti.                                                                                                                                                                                                                                                                                                                                                                                                                                                                                                              |
| 21 | randomized controlled trial.pt.                                                                                                                                                                                                                                                                                                                                                                                                                                                                                            |
| 22 | controlled clinical trial.pt.                                                                                                                                                                                                                                                                                                                                                                                                                                                                                              |
| 23 | 16 or 17 or 18 or 19 or 20 or 21 or 22                                                                                                                                                                                                                                                                                                                                                                                                                                                                                     |
| 24 | 15 and 23                                                                                                                                                                                                                                                                                                                                                                                                                                                                                                                  |

## Supplementary Figure S2: Subgroup Analyses

### 1.2 Falls Rate - Known vs. Unknown Faller

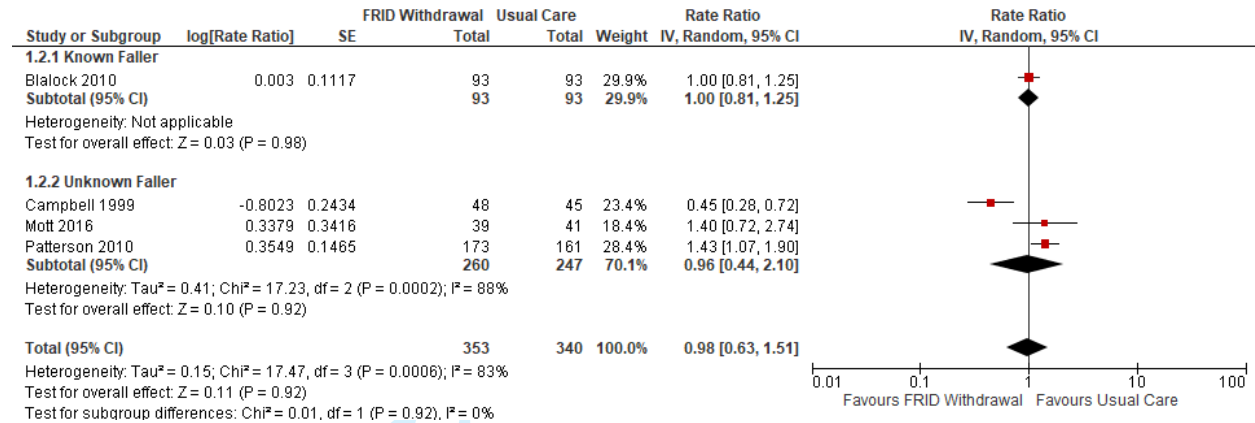

### 1.3 Falls Rate - Community vs. Institutionalized

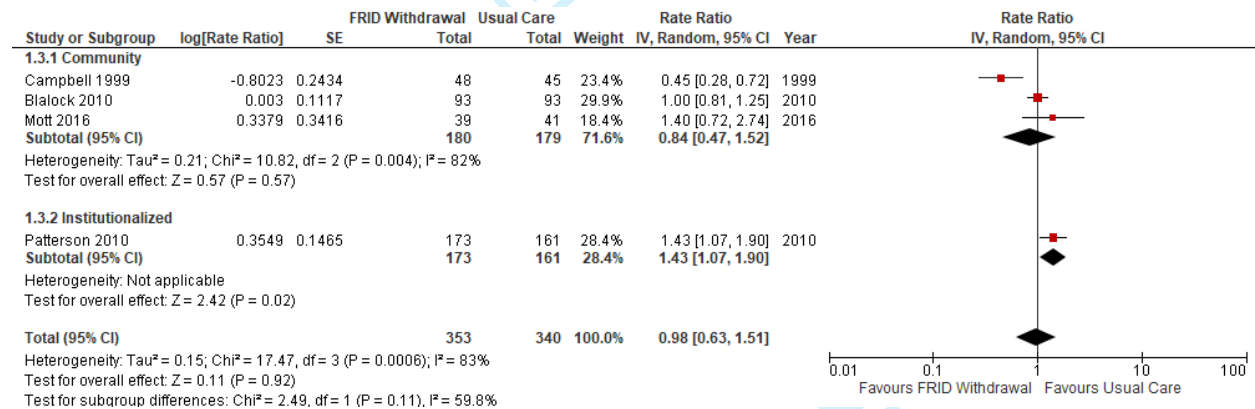

### 1.4 Falls Rate - Psychotropic Withdrawal vs. Any FRID Withdrawal

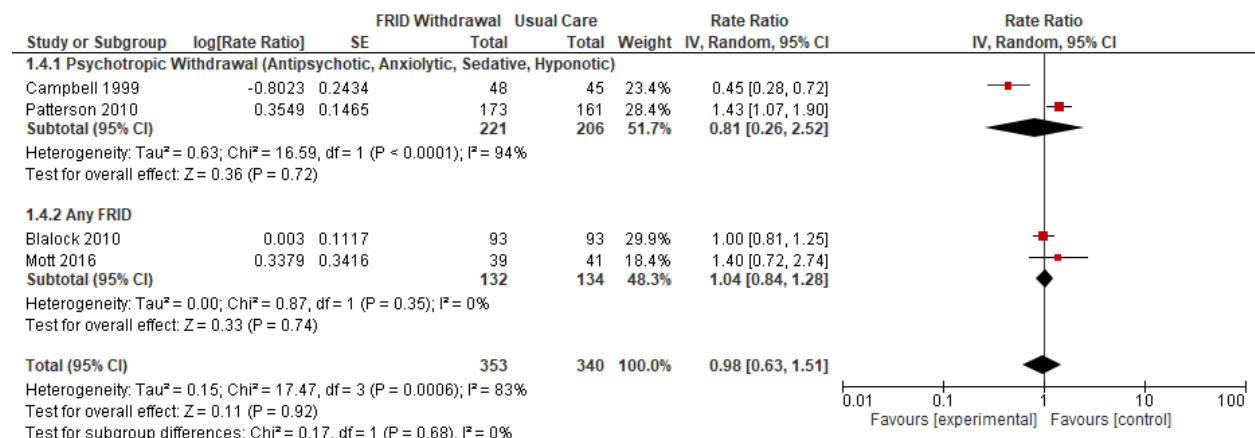

### 1.5 Falls Rate - Physician vs. Pharmacist Medication Review

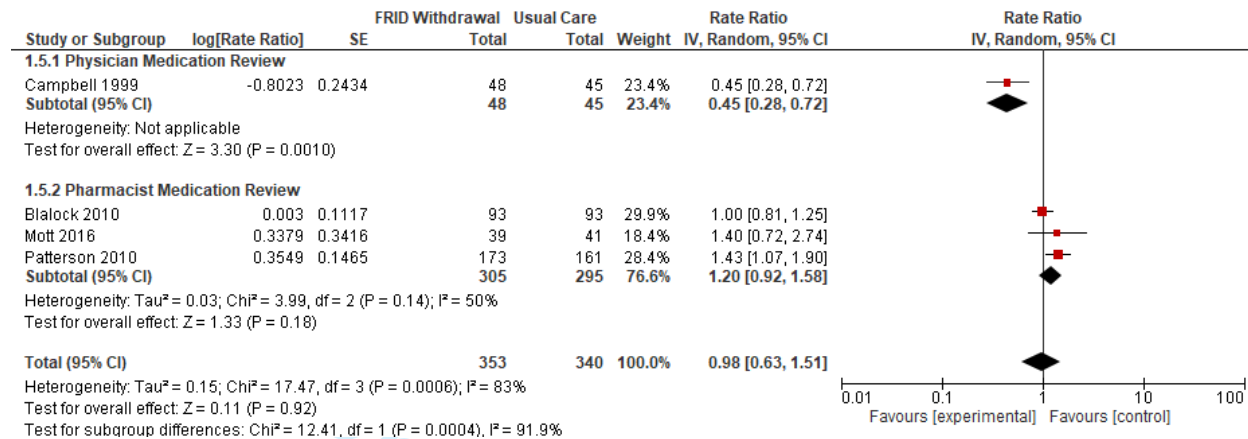

### 1.6 Falls Rate - Observed vs. Self-Reported Falls

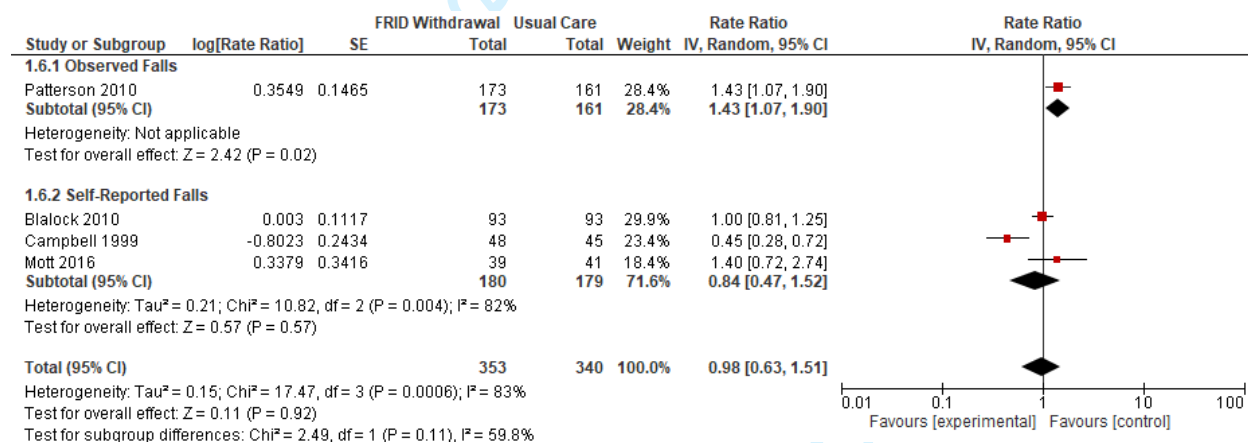

## 2.2 Falls Incidence - Known vs. Unknown Faller

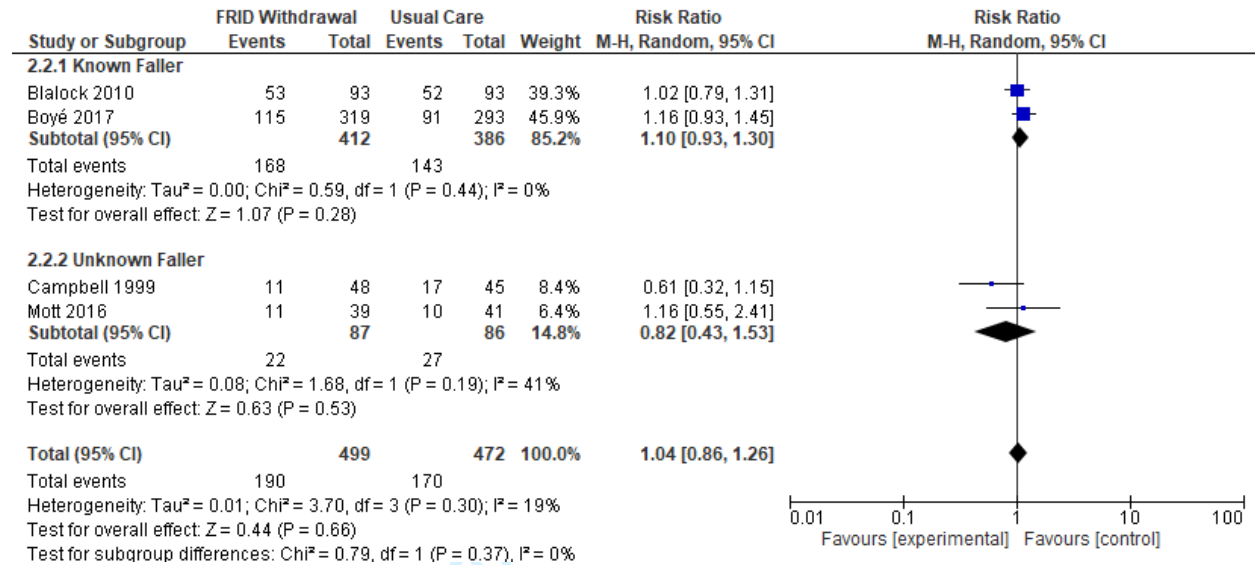

## 2.3 Falls Incidence - Psychotropic Withdrawal vs. Any FRID Withdrawal

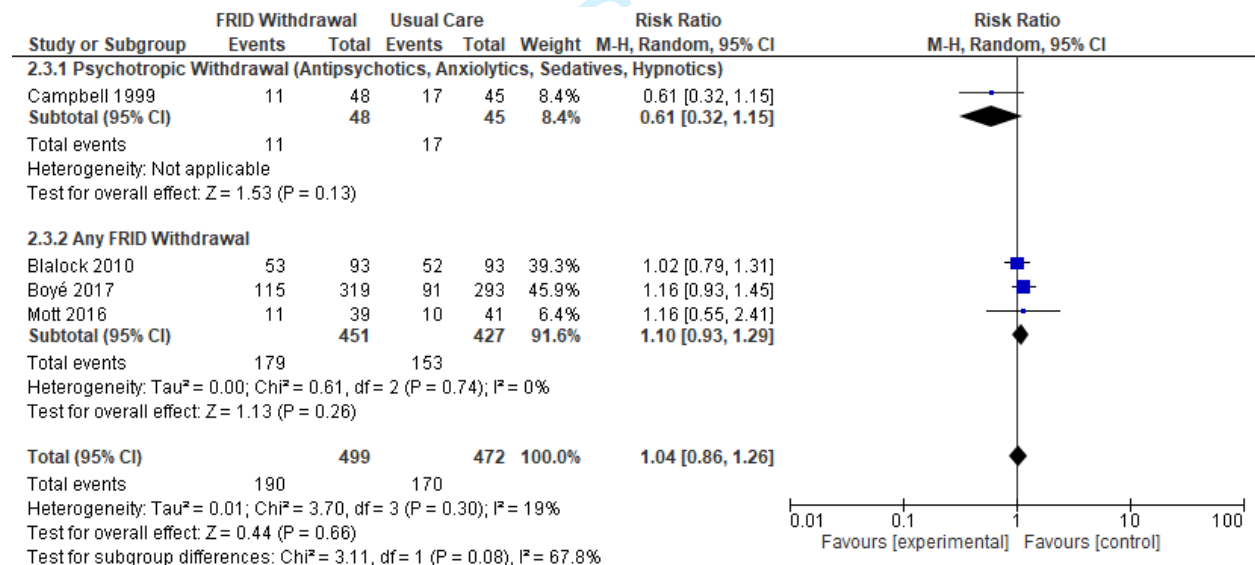

## 2.4 Falls Incidence - Physician vs. Pharmacist Medication Review

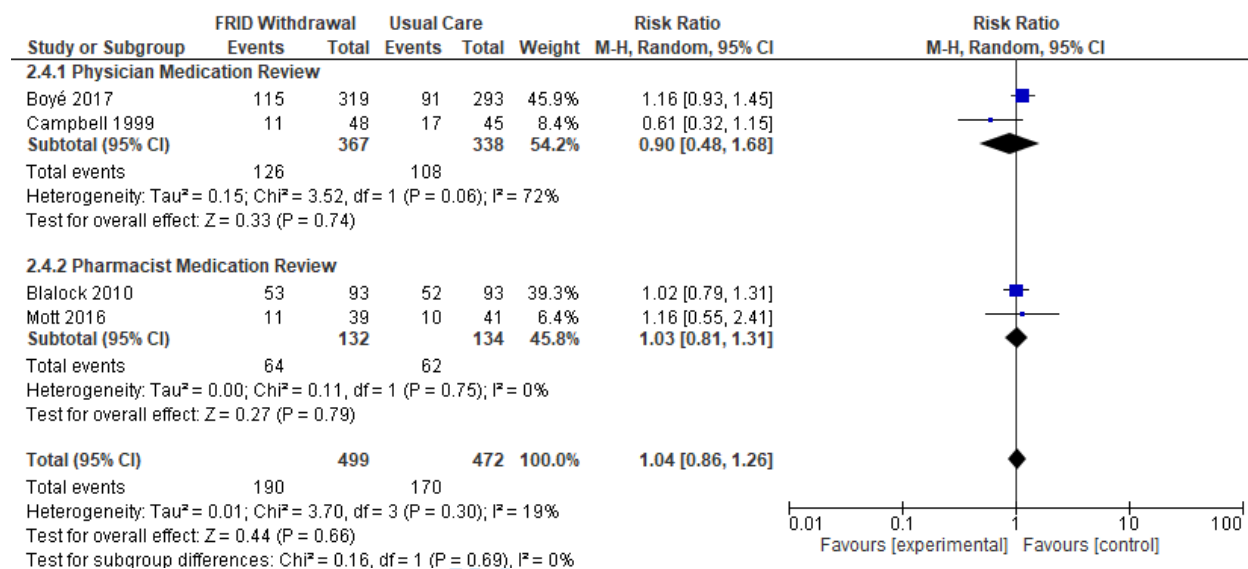

Peer review only

**Supplementary Table S1: Subgroup Credibility Assessments****Physician vs. Pharmacist Medication Review Subgroup for Falls Rate**

| <b>Design</b>                                                                                         | <b>Criteria Met?</b>                                                |
|-------------------------------------------------------------------------------------------------------|---------------------------------------------------------------------|
| Is the subgroup variable a characteristic measured at baseline or after randomization?                | Yes – Variable determined at baseline                               |
| Is the effect suggested by comparisons within rather than between studies?                            | No – Comparison between studies                                     |
| Was the hypothesis specified a priori?                                                                | Yes                                                                 |
| Was the direction of the subgroup effect specified a priori?                                          | No                                                                  |
| Was the subgroup effect one of a small number of hypothesized effects tested?                         | Yes – 1 of 5 analyses                                               |
| <b>Analysis</b>                                                                                       |                                                                     |
| Does the interaction test suggest a low likelihood that chance explains the apparent subgroup effect? | Yes – $p = 0.0004$                                                  |
| Is the significant subgroup effect independent?                                                       | Yes                                                                 |
| <b>Context</b>                                                                                        |                                                                     |
| Is the size of the subgroup effect large?                                                             | Yes – RaR 0.45 vs. 1.20                                             |
| Is the interaction consistent across studies?                                                         | No                                                                  |
| Is the interaction consistent across closely related outcomes within the study?                       | No – Subgroup interaction was not seen for incidence of falls       |
| Is there indirect evidence that supports the hypothesized interaction (biological rationale)?         | No - No compelling external evidence supporting subgroup hypothesis |

### Antipsychotic vs. Any FRID Withdrawal for Falls Incidence

| Design                                                                                                | Criteria Met?                                                                                                                                                                |
|-------------------------------------------------------------------------------------------------------|------------------------------------------------------------------------------------------------------------------------------------------------------------------------------|
| Is the subgroup variable a characteristic measured at baseline or after randomization?                | Yes – Variable determined at baseline                                                                                                                                        |
| Is the effect suggested by comparisons within rather than between studies?                            | No – Comparison between studies                                                                                                                                              |
| Was the hypothesis specified a priori?                                                                | Yes                                                                                                                                                                          |
| Was the direction of the subgroup effect specified a priori?                                          | No                                                                                                                                                                           |
| Was the subgroup effect one of a small number of hypothesized effects tested?                         | Yes – 1 of 3 analyses                                                                                                                                                        |
| Analysis                                                                                              |                                                                                                                                                                              |
| Does the interaction test suggest a low likelihood that chance explains the apparent subgroup effect? | Yes – $p=0.06$                                                                                                                                                               |
| Is the significant subgroup effect independent?                                                       | No                                                                                                                                                                           |
| Context                                                                                               |                                                                                                                                                                              |
| Is the size of the subgroup effect large?                                                             | Yes – RR 0.61 vs. 1.14                                                                                                                                                       |
| Is the interaction consistent across studies?                                                         | No                                                                                                                                                                           |
| Is the interaction consistent across closely related outcomes within the study?                       | No – Subgroup interaction was not seen for rate of falls                                                                                                                     |
| Is there indirect evidence that supports the hypothesized interaction (biological rationale)?         | Yes – Antipsychotics associated with one of highest risks of falls. The withdrawal of any FRID may involve withdrawal of those with lower risks and limit potential benefit. |



## Supplementary Figure S3: Sensitivity Analyses

### 4.1 Falls Rate - Low vs. High Risk of Bias due to Blinding

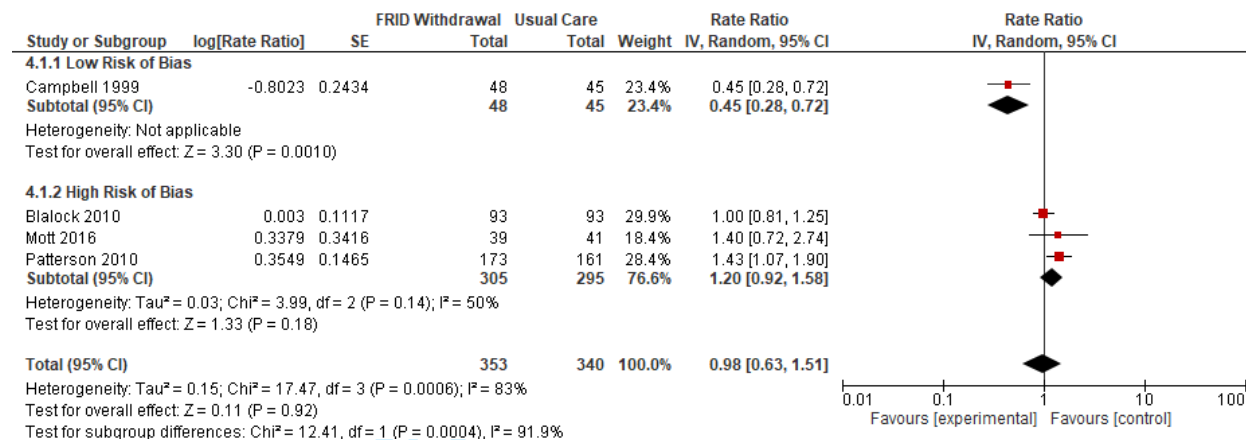

### 4.2 Falls Rate - Low vs. High Risk of Bias due to Attritional Bias

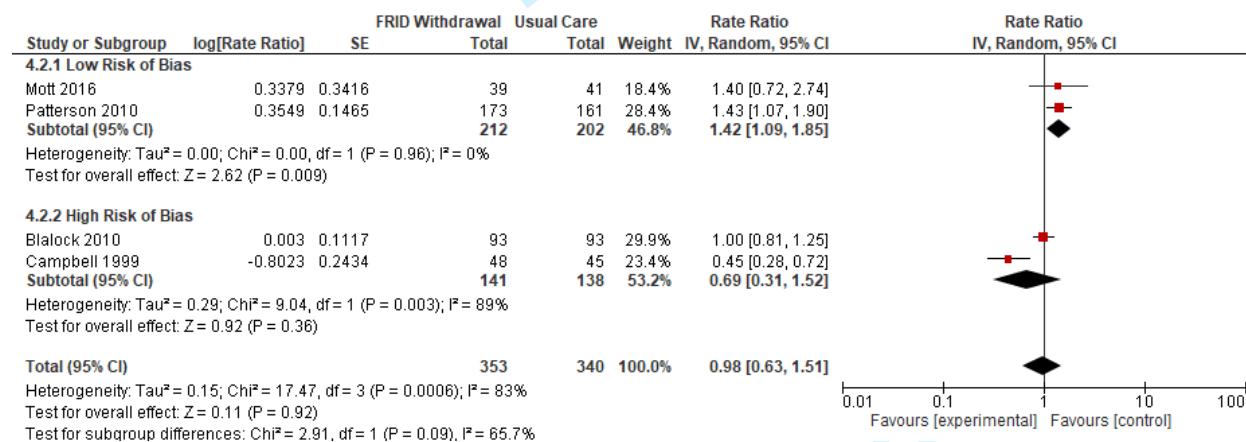

### 4.3 Falls Incidence - Low vs. High Risk of Bias due to Blinding

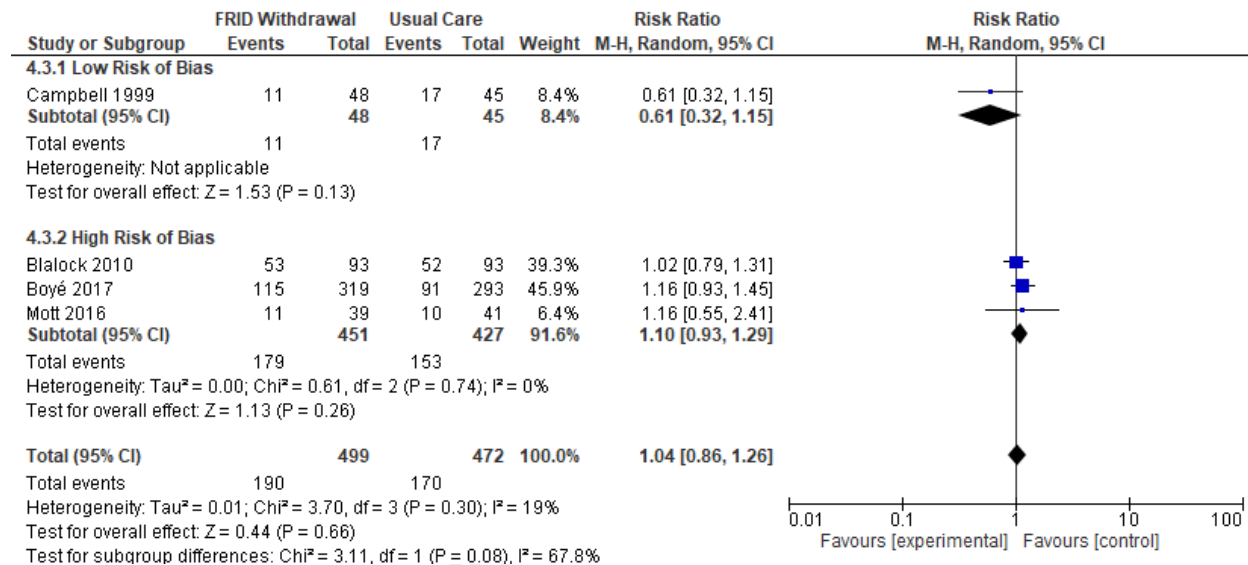

### 4.4 Falls Incidence - Low vs. High Risk of Bias due to Attrition Bias

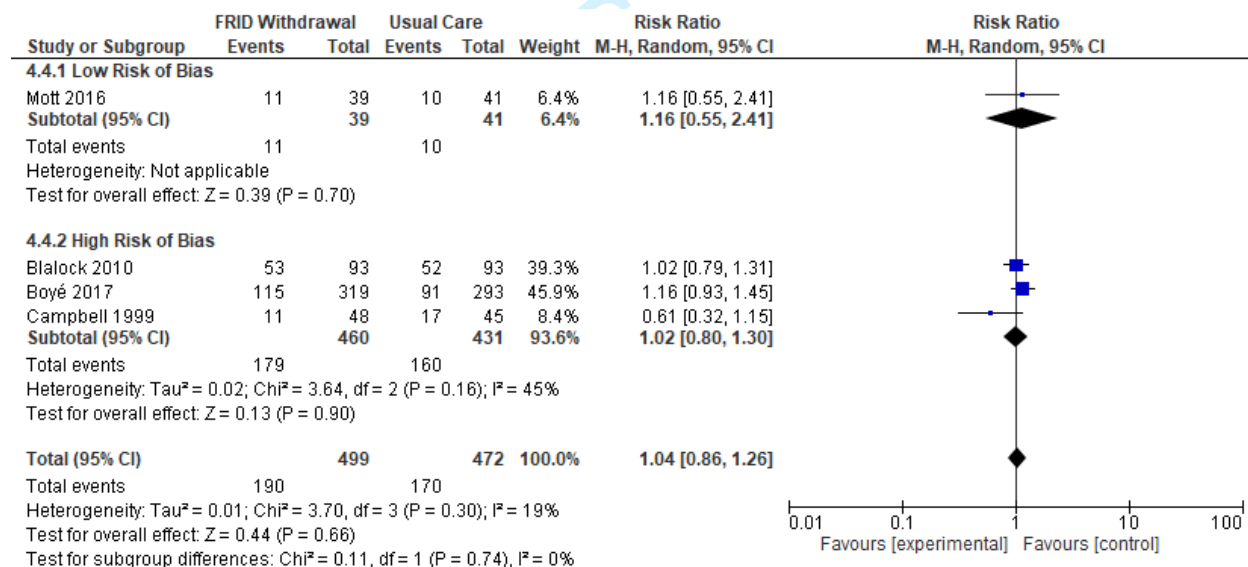

## 4.5 Falls Rate – Random vs. Effects Model

### Random Effects Model

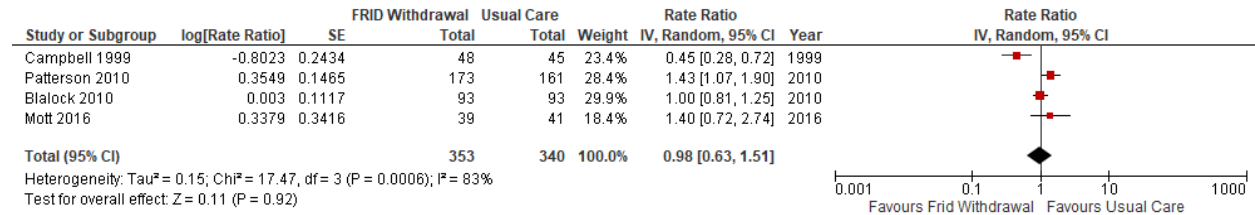

### Fixed Effects Model

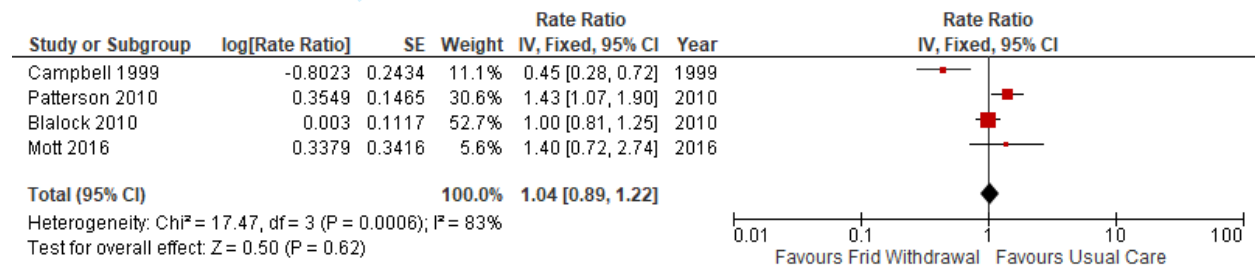

## 4.6 Falls Incidence – Random vs. Fixed Effects Model

### Random Effects Model

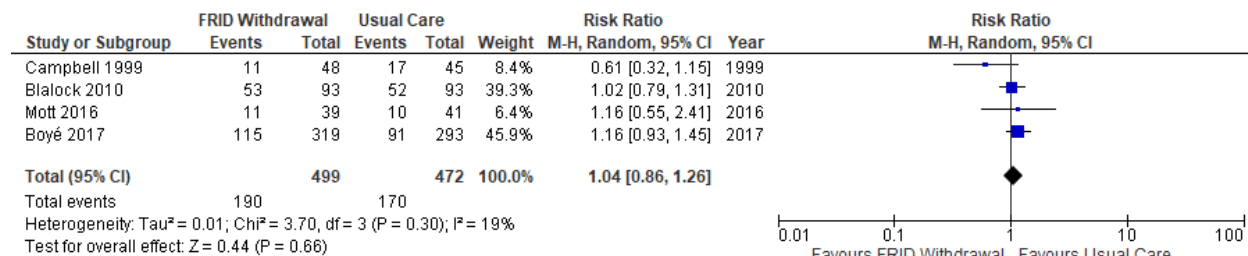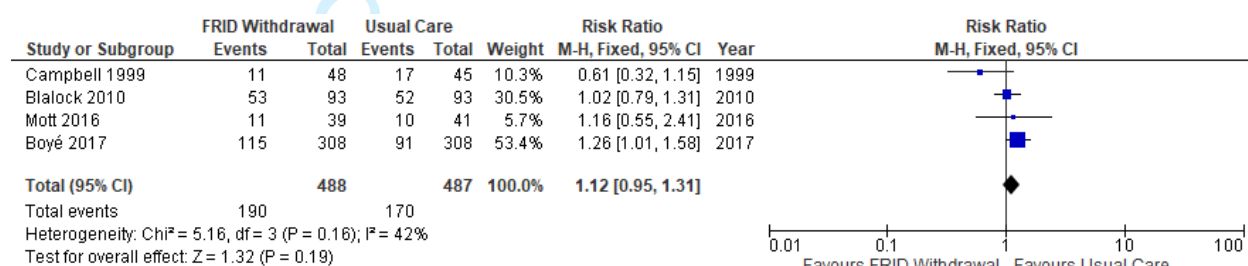

### Fixed Effects Model

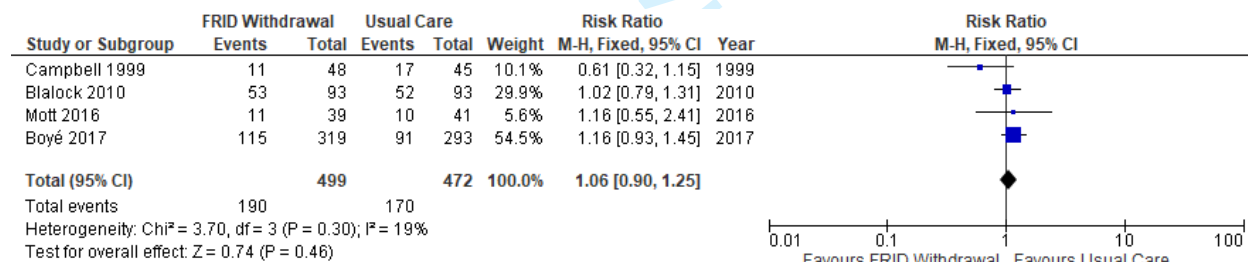

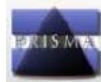

# PRISMA 2009 Checklist

| Section/topic                      | #  | Checklist item                                                                                                                                                                                                                                                                                              | Reported on page #      |
|------------------------------------|----|-------------------------------------------------------------------------------------------------------------------------------------------------------------------------------------------------------------------------------------------------------------------------------------------------------------|-------------------------|
| <b>TITLE</b>                       |    |                                                                                                                                                                                                                                                                                                             |                         |
| Title                              | 1  | Identify the report as a systematic review, meta-analysis, or both.                                                                                                                                                                                                                                         | 1                       |
| <b>ABSTRACT</b>                    |    |                                                                                                                                                                                                                                                                                                             |                         |
| Structured summary                 | 2  | Provide a structured summary including, as applicable: background; objectives; data sources; study eligibility criteria, participants, and interventions; study appraisal and synthesis methods; results; limitations; conclusions and implications of key findings; systematic review registration number. | 2-3                     |
| <b>INTRODUCTION</b>                |    |                                                                                                                                                                                                                                                                                                             |                         |
| Rationale                          | 3  | Describe the rationale for the review in the context of what is already known.                                                                                                                                                                                                                              | 5-6                     |
| Objectives                         | 4  | Provide an explicit statement of questions being addressed with reference to participants, interventions, comparisons, outcomes, and study design (PICOS).                                                                                                                                                  | 6                       |
| <b>METHODS</b>                     |    |                                                                                                                                                                                                                                                                                                             |                         |
| Protocol and registration          | 5  | Indicate if a review protocol exists, if and where it can be accessed (e.g., Web address), and, if available, provide registration information including registration number.                                                                                                                               | 6                       |
| Eligibility criteria               | 6  | Specify study characteristics (e.g., PICOS, length of follow-up) and report characteristics (e.g., years considered, language, publication status) used as criteria for eligibility, giving rationale.                                                                                                      | 7                       |
| Information sources                | 7  | Describe all information sources (e.g., databases with dates of coverage, contact with study authors to identify additional studies) in the search and date last searched.                                                                                                                                  | 7                       |
| Search                             | 8  | Present full electronic search strategy for at least one database, including any limits used, such that it could be repeated.                                                                                                                                                                               | Supplementary Figure S1 |
| Study selection                    | 9  | State the process for selecting studies (i.e., screening, eligibility, included in systematic review, and, if applicable, included in the meta-analysis).                                                                                                                                                   | 7                       |
| Data collection process            | 10 | Describe method of data extraction from reports (e.g., piloted forms, independently, in duplicate) and any processes for obtaining and confirming data from investigators.                                                                                                                                  | 8                       |
| Data items                         | 11 | List and define all variables for which data were sought (e.g., PICOS, funding sources) and any assumptions and simplifications made.                                                                                                                                                                       | 8                       |
| Risk of bias in individual studies | 12 | Describe methods used for assessing risk of bias of individual studies (including specification of whether this was done at the study or outcome level), and how this information is to be used in any data synthesis.                                                                                      | 8                       |
| Summary measures                   | 13 | State the principal summary measures (e.g., risk ratio, difference in means).                                                                                                                                                                                                                               | 8                       |
| Synthesis of results               | 14 | Describe the methods of handling data and combining results of studies, if done, including measures of consistency (e.g., $I^2$ ) for each meta-analysis.                                                                                                                                                   | 8-9                     |

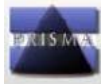

# PRISMA 2009 Checklist

Page 1 of 2

| Section/topic                 | #  | Checklist item                                                                                                                                                                                           | Reported on page # |
|-------------------------------|----|----------------------------------------------------------------------------------------------------------------------------------------------------------------------------------------------------------|--------------------|
| Risk of bias across studies   | 15 | Specify any assessment of risk of bias that may affect the cumulative evidence (e.g., publication bias, selective reporting within studies).                                                             | 9                  |
| Additional analyses           | 16 | Describe methods of additional analyses (e.g., sensitivity or subgroup analyses, meta-regression), if done, indicating which were pre-specified.                                                         | 9                  |
| <b>RESULTS</b>                |    |                                                                                                                                                                                                          |                    |
| Study selection               | 17 | Give numbers of studies screened, assessed for eligibility, and included in the review, with reasons for exclusions at each stage, ideally with a flow diagram.                                          | 10<br>Figure 1     |
| Study characteristics         | 18 | For each study, present characteristics for which data were extracted (e.g., study size, PICOS, follow-up period) and provide the citations.                                                             | 10-11<br>Table 1   |
| Risk of bias within studies   | 19 | Present data on risk of bias of each study and, if available, any outcome level assessment (see item 12).                                                                                                | 13<br>Figure 3     |
| Results of individual studies | 20 | For all outcomes considered (benefits or harms), present, for each study: (a) simple summary data for each intervention group (b) effect estimates and confidence intervals, ideally with a forest plot. | 12-13,<br>Figure 2 |
| Synthesis of results          | 21 | Present results of each meta-analysis done, including confidence intervals and measures of consistency.                                                                                                  | 12-13<br>Figure 2  |
| Risk of bias across studies   | 22 | Present results of any assessment of risk of bias across studies (see Item 15).                                                                                                                          | 15<br>Table 2      |
| Additional analysis           | 23 | Give results of additional analyses, if done (e.g., sensitivity or subgroup analyses, meta-regression [see Item 16]).                                                                                    | 14-15              |
| <b>DISCUSSION</b>             |    |                                                                                                                                                                                                          |                    |
| Summary of evidence           | 24 | Summarize the main findings including the strength of evidence for each main outcome; consider their relevance to key groups (e.g., healthcare providers, users, and policy makers).                     | 17-19              |
| Limitations                   | 25 | Discuss limitations at study and outcome level (e.g., risk of bias), and at review-level (e.g., incomplete retrieval of identified research, reporting bias).                                            | 17-20              |
| Conclusions                   | 26 | Provide a general interpretation of the results in the context of other evidence, and implications for future research.                                                                                  | 20                 |
| <b>FUNDING</b>                |    |                                                                                                                                                                                                          |                    |
| Funding                       | 27 | Describe sources of funding for the systematic review and other support (e.g., supply of data); role of funders for the systematic review.                                                               | 21                 |

From: Moher D, Liberati A, Tetzlaff J, Altman DG, The PRISMA Group (2009). Preferred Reporting Items for Systematic Reviews and Meta-Analyses: The PRISMA Statement. PLoS Med 6(6): e1000097. doi:10.1371/journal.pmed1000097

For peer review only, <http://bmjopen.bmj.com/site/about/guidelines.xhtml>

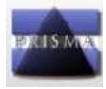

# PRISMA 2009 Checklist

For peer review only

- 1
- 2
- 3
- 4
- 5
- 6
- 7
- 8
- 9
- 10
- 11
- 12
- 13
- 14
- 15
- 16
- 17
- 18
- 19
- 20
- 21
- 22
- 23
- 24
- 25
- 26
- 27
- 28
- 29
- 30
- 31
- 32
- 33
- 34
- 35
- 36
- 37
- 38
- 39
- 40
- 41
- 42
- 43
- 44
- 45
- 46
- 47

# BMJ Open

## Deprescribing Fall-Risk-Increasing Drugs (FRIDs) for the Prevention of Falls and Fall-related Complications: A Systematic Review and Meta-analysis

|                                 |                                                                                                                                                                                                                                                                                                                                                                                                                                                                                                                                                                                                                                                                                                                                                                                                |
|---------------------------------|------------------------------------------------------------------------------------------------------------------------------------------------------------------------------------------------------------------------------------------------------------------------------------------------------------------------------------------------------------------------------------------------------------------------------------------------------------------------------------------------------------------------------------------------------------------------------------------------------------------------------------------------------------------------------------------------------------------------------------------------------------------------------------------------|
| Journal:                        | <i>BMJ Open</i>                                                                                                                                                                                                                                                                                                                                                                                                                                                                                                                                                                                                                                                                                                                                                                                |
| Manuscript ID                   | bmjopen-2019-035978.R1                                                                                                                                                                                                                                                                                                                                                                                                                                                                                                                                                                                                                                                                                                                                                                         |
| Article Type:                   | Original research                                                                                                                                                                                                                                                                                                                                                                                                                                                                                                                                                                                                                                                                                                                                                                              |
| Date Submitted by the Author:   | 12-Aug-2020                                                                                                                                                                                                                                                                                                                                                                                                                                                                                                                                                                                                                                                                                                                                                                                    |
| Complete List of Authors:       | Lee, Justin; McMaster University, Division of Geriatric Medicine, Department of Medicine; McMaster University, Department of Health Research Methods, Evidence and Impact<br>Negm, AM; McMaster University Faculty of Health Sciences, School of Rehabilitation Sciences; Hamilton Health Sciences, Geriatric Education and Research in Aging Sciences Centre<br>Peters, Ryan; McMaster University Faculty of Health Sciences, Michael G. DeGroot School of Medicine<br>Wong, Eric; University of Toronto, Division of Geriatric Medicine, Department of Medicine<br>Holbrook, Anne; McMaster University, Division of Clinical Pharmacology and Toxicology, Department of Medicine; McMaster University Faculty of Health Sciences, Department of Health Research Methods, Evidence and Impact |
| <b>Primary Subject Heading</b>: | Geriatric medicine                                                                                                                                                                                                                                                                                                                                                                                                                                                                                                                                                                                                                                                                                                                                                                             |
| Secondary Subject Heading:      | Pharmacology and therapeutics, General practice / Family practice                                                                                                                                                                                                                                                                                                                                                                                                                                                                                                                                                                                                                                                                                                                              |
| Keywords:                       | INTERNAL MEDICINE, CLINICAL PHARMACOLOGY, GERIATRIC MEDICINE, PRIMARY CARE                                                                                                                                                                                                                                                                                                                                                                                                                                                                                                                                                                                                                                                                                                                     |
|                                 |                                                                                                                                                                                                                                                                                                                                                                                                                                                                                                                                                                                                                                                                                                                                                                                                |

SCHOLARONE™  
Manuscripts





I, the Submitting Author has the right to grant and does grant on behalf of all authors of the Work (as defined in the below author licence), an exclusive licence and/or a non-exclusive licence for contributions from authors who are: i) UK Crown employees; ii) where BMJ has agreed a CC-BY licence shall apply, and/or iii) in accordance with the terms applicable for US Federal Government officers or employees acting as part of their official duties; on a worldwide, perpetual, irrevocable, royalty-free basis to BMJ Publishing Group Ltd ("BMJ") its licensees and where the relevant Journal is co-owned by BMJ to the co-owners of the Journal, to publish the Work in this journal and any other BMJ products and to exploit all rights, as set out in our [licence](#).

The Submitting Author accepts and understands that any supply made under these terms is made by BMJ to the Submitting Author unless you are acting as an employee on behalf of your employer or a postgraduate student of an affiliated institution which is paying any applicable article publishing charge ("APC") for Open Access articles. Where the Submitting Author wishes to make the Work available on an Open Access basis (and intends to pay the relevant APC), the terms of reuse of such Open Access shall be governed by a Creative Commons licence – details of these licences and which [Creative Commons](#) licence will apply to this Work are set out in our licence referred to above.

Other than as permitted in any relevant BMJ Author's Self Archiving Policies, I confirm this Work has not been accepted for publication elsewhere, is not being considered for publication elsewhere and does not duplicate material already published. I confirm all authors consent to publication of this Work and authorise the granting of this licence.

1  
2  
3 **TITLE:** Deprescribing Fall-Risk-Increasing Drugs (FRIDs) for the Prevention of Falls and  
4  
5 Fall-related Complications: A Systematic Review and Meta-analysis  
6  
7  
8  
9

10 **AUTHORS:** Justin Lee, BScPhm, ACPR, MD<sup>1,2,3</sup>

11  
12 Ahmed Negm, MD, MSc, PhD<sup>3,4</sup>

13  
14 Ryan Peters, BSc, MD<sup>5</sup>

15  
16 Eric Wong, BSc, MD<sup>6</sup>

17  
18 Anne Holbrook, MD, PharmD, MSc<sup>2,7</sup>  
19  
20  
21  
22  
23

24 <sup>1</sup>Division of Geriatric Medicine, Department of Medicine, McMaster University, Hamilton,  
25 Ontario, Canada

26 <sup>2</sup>Department of Health Research Methods, Evidence, and Impact, McMaster University,  
27 Hamilton,  
28 Ontario, Canada

29 <sup>3</sup>Geriatric Education and Research in Aging Sciences (GERAS) Centre, Hamilton, Ontario,  
30 Canada

31 <sup>4</sup>School of Rehabilitation Sciences, Faculty of Health Sciences, McMaster University, Hamilton  
32 Ontario, Canada;

33 <sup>5</sup>Michael DeGroote School of Medicine, McMaster University, Hamilton, Ontario, Canada

34 <sup>6</sup>Division of Geriatric Medicine, Department of Medicine, University of Toronto, Toronto,  
35 Ontario, Canada

36 <sup>7</sup>Division of Clinical Pharmacology and Toxicology, Department of Medicine, McMaster  
37 University, Hamilton, Ontario, Canada  
38  
39  
40

41 **CORRESPONDING AUTHOR:** Justin Lee  
42 Geriatric Education and Research in Aging Sciences Centre  
43 88 Maplewood Avenue, Room 158  
44 Hamilton, Ontario, Canada L8M 1W9  
45 Email: [justin.lee@medportal.ca](mailto:justin.lee@medportal.ca)  
46 Telephone: (905) 521-2100  
47  
48

49 **MAIN TEXT WORD COUNT:** 3582 (excluding title page, abstract, references, tables)  
50  
51  
52  
53  
54  
55  
56  
57  
58  
59  
60

**ABSTRACT:**

**Objectives:** Prevention of falls and fall-related injuries is a priority due to the substantial health and financial burden of falls on patients and healthcare systems. Deprescribing medications known as “fall-risk increasing drugs” (FRIDs) is a common strategy to prevent falls based on associations in observational studies and presumed benefit. We conducted a systematic review to determine its efficacy for the prevention of falls and fall-related complications.

**Design:** Systematic review and meta-analysis

**Data sources:** MEDLINE, EMBASE, CENTRAL, CINAHL and grey literature from inception to August 1, 2020.

**Eligibility criteria for selecting studies:** Randomized controlled trials of FRID withdrawal compared to usual care evaluating the rate of falls, incidence of falls, fall-related injuries, fall-related fractures, fall-related hospitalizations or adverse effects related to the intervention in adults aged  $\geq 65$  years.

**Data extraction and synthesis:** Two reviewers independently performed citation screening, data abstraction, risk of bias assessment and certainty of evidence grading. Random-effects models were used for meta-analyses.

**Results:** Five trials involving 1305 participants met eligibility criteria. Deprescribing FRIDs did not change the rate of falls (rate ratio [RaR] 0.98, 95% CI 0.63 to 1.51), the incidence of falls (risk

1  
2  
3 difference [RD] 0.01, 95% CI -0.06 to 0.09; relative risk [RR] 1.04, 95% CI 0.86 to 1.26) or rate  
4 of fall-related injuries (RaR 0.89, 95% CI 0.57 to 1.39) over a 6 to 12 month follow-up period. No  
5  
6 trials evaluated the impact of deprescribing FRIDs on fall-related fractures or hospitalizations.  
7  
8  
9  
10

11  
12 **Conclusion:** There is a paucity of robust high-quality evidence to support or refute that a FRID  
13  
14 deprescribing strategy is effective at preventing falls or falls-related injury in older adults.  
15  
16 Although there may be other reasons to deprescribe FRIDs, our systematic review found that it  
17  
18 may result in little to no difference in the rate or risk of falls as an isolated falls reduction strategy.  
19  
20  
21  
22  
23

24 **Registration:** PROSPERO CRD42016040203  
25  
26  
27

28 **Key Words:** Falls, Falls prevention, Fall-risk increasing drug (FRID), Deprescribing, Medication  
29  
30 withdrawal, Seniors, Older Adults, Systematic review  
31  
32  
33  
34

35 **Word Count: 300**  
36  
37  
38  
39  
40  
41  
42  
43  
44  
45  
46  
47  
48  
49  
50  
51  
52  
53  
54  
55  
56  
57  
58  
59  
60

## ARTICLE SUMMARY

### Strengths and Limitations of this Study:

- This study's results are based on a systematic review and meta-analysis of randomised controlled trials
- We employed rigorous analytic methods and interpretational approaches including duplicate assessment, subgroup credibility criteria and optimal information size considerations.
- We assessed the certainty in evidence (i.e. quality of evidence) using the Grading of Recommendations, Assessment, Development and Evaluation (GRADE) Framework.
- Additional studies are needed to reach the optimal information size to reduce uncertainty about this intervention and establish its relative importance in the range of possible fall prevention interventions

## INTRODUCTION

Falls and fall-related injuries are significant public health concerns. Every year, 1 in 3 older adults aged  $\geq 65$  years falls and 10% of these falls cause serious injury or hospitalization.[1] Falls are estimated to annually cost \$50 billion in the United States, \$2 billion in Canada, and £2.3 billion in the United Kingdom.[2–4] All jurisdictional levels are making significant investments to implement falls prevention quality improvement initiatives. These include Public Health England’s National Falls Prevention Coordinating Group (NFPRCG), the Centers for Disease Control and Prevention (CDC) Stopping Elderly Accidents, Deaths, & Injuries (STEADI) Initiative, and Health Canada’s Canadian Patient Safety Institute “Reducing Falls and Injuries from Falls” initiative. National accreditation bodies such as the United States Joint Commission and Accreditation Canada also mandate specific falls prevention activities of healthcare organizations through their required organizational practices and standards.

Since the majority of falls result from multiple factors (e.g. poor strength and balance, visual and cognitive impairment), current practice guidelines and accreditation standards focus on multi-component assessment and intervention strategies.[5] However, the 2018 United States Preventive Services Task Force evidence report recommends that multifactorial interventions only be offered to select patients because the overall net benefit is small.[6] In fact, there is ongoing debate on the relative merits of focusing on single versus multifactorial interventions, and many clinicians and institutions focus on single interventions due to limited resources.[7]

As an individual intervention, only exercise has robust evidence demonstrating reductions in the incidence of fallers and rate of injurious falls.[6,8] It is unclear if other parts of the multi-component strategy are effective, how large is their individual treatment effect, and which components should be prioritized when resources are limited.

1  
2  
3 Although there is limited evidence of effectiveness, deprescribing medications known as  
4 “fall-risk increasing drugs” (FRIDs) is common practice and typically included in both  
5 multifactorial and single intervention strategies. The justification is based primarily on  
6 observational studies that suggest certain medications are associated with increased falls risk.  
7  
8 These include anti-hypertensives, anti-arrhythmics, anti-cholinergics, anti-histamines, sedatives-  
9  
10 hypnotics, anti-psychotics, anti-depressants, opioids and NSAIDs.[9–14] Although the  
11  
12 mechanisms are not fully understood, these drugs may influence falls risk by adversely affecting  
13  
14 the cardiovascular or central nervous system (e.g. orthostatic hypotension, bradycardia, sedation,  
15  
16 sleep disturbance, confusion, dizziness).  
17  
18  
19  
20  
21  
22  
23

24 Key issues affecting the quality of this observational evidence and certainty of a causal  
25  
26 relationship include: (1) variable adjustment for confounders, dosage or duration of therapy, (2)  
27  
28 medication use confirmed only at baseline (but not throughout follow-up), and (3) potential  
29  
30 prescribing bias associated with specific medication classes. Most meta-analyses have also been  
31  
32 based on the pooling of unadjusted estimates and thus susceptible to bias including confounding  
33  
34 by indication. As a result, it is unclear whether the observed increase in falls is causally related to  
35  
36 such drug use versus the underlying conditions or patients for which the drugs are treating.  
37  
38  
39

40 With the aim of evaluating its effectiveness as a falls prevention strategy, we conducted  
41  
42 this systematic review to determine whether deprescribing FRIDs decreases the risk of falls  
43  
44 compared to usual care in older adults. To the best of our knowledge, no previous systematic  
45  
46 review has addressed this specific question.  
47  
48  
49  
50

## 51 **METHODS**

52  
53  
54  
55  
56  
57  
58  
59  
60

1  
2  
3 This review was developed using the Cochrane Handbook and reported in accordance with  
4 the Preferred Reporting Items for Systematic Reviews and Meta-Analyses (PRISMA)  
5 guidelines.[15,16] The protocol was registered in PROSPERO (CRD42016040203) and  
6  
7  
8  
9  
10 previously published and described in detail.[17]  
11  
12  
13

## 14 **Search Strategy**

15  
16  
17 MEDLINE, EMBASE, CINAHL and the Cochrane Central Register of Controlled Trials  
18 (CENTRAL) electronic databases were searched from inception to August 1, 2020 using a  
19  
20  
21 combination of Medical Subject Headings, controlled and free-text terms synonymous for the  
22  
23  
24 intervention. The MEDLINE search strategy is shown in Supplementary Figure S1. This strategy  
25  
26  
27 was modified for use in other databases.

28  
29 Reference lists of relevant studies, reviews and guidelines were reviewed to identify  
30  
31  
32 additional studies. Trial registries and geriatric medicine conference abstracts were also reviewed.  
33  
34

## 35 **Study Eligibility Criteria**

36  
37  
38 After pilot testing the eligibility criteria, pairs of reviewers independently conducted  
39  
40  
41 screening. A third reviewer resolved disagreements.

42  
43  
44 Studies were included if they were RCTs evaluating FRID deprescribing or withdrawal  
45  
46  
47 with the intent of reducing falls. FRID deprescribing was defined as the planned and supervised  
48  
49  
50 discontinuation or dose reduction of single or multiple medications thought to independently  
51  
52  
53 increase falls risk.[9–11]

54  
55  
56 The comparator could be usual care (i.e. no change in usual activities and/or no FRID  
57  
58  
59 withdrawal) or a control intervention not thought to reduce falls. Studies focused on adults aged  
60



1  
2  
3 ≥65 years from all settings were included. Studies involving FRID withdrawal within multi-  
4  
5 component interventions were excluded if the effect of FRID withdrawal could not be isolated.  
6  
7

8 The primary outcomes of this review were the (1) rate of falls (defined as the total number  
9  
10 of falls per unit of person time that falls were monitored) and (2) incidence of falls (i.e. number of  
11  
12 fallers). Secondary outcomes included the incidence of (1) fall-related fractures, (2) fall-related  
13  
14 injuries, (3) fall-related hospitalization, (4) adverse effects related to the withdrawal intervention  
15  
16 (e.g. disease relapse, symptomatic withdrawal).  
17  
18  
19  
20  
21

## 22 **Data Extraction and Quality Assessment**

23  
24 Two reviewers independently abstracted data on study characteristics, participants,  
25  
26 interventions, comparisons, and outcomes using standardized electronic data extraction forms.  
27  
28 Disagreements were resolved through consensus.  
29  
30

31 Two reviewed independently conducted risk of bias (RoB) assessments using the Cochrane  
32  
33 Risk of Bias tool.[18] A previously published modification to the RoB assessment was employed  
34  
35 to estimate unclearly reported study methods and allow for sensitivity analysis.[19] This  
36  
37 modification involved a structured approach where a score of “definitely low risk”, “probably low  
38  
39 risk”, “probably high risk”, or “definitely high risk” was assigned to each RoB criterion.  
40  
41 “Definitely” and “probably” scores were collapsed for both low and high RoB scores.  
42  
43 Disagreements were resolved through consensus.  
44  
45  
46  
47  
48

## 49 **Data Synthesis and Analysis**

50  
51 The rate of falls was reported as a rate ratio (RaR) with a 95% confidence interval (CI).  
52  
53 Dichotomous outcomes (i.e. incidences of falls, fall-related fracture, fall-related injury, fall-related  
54  
55  
56  
57  
58  
59  
60

1  
2  
3 hospitalization and adverse effects related to the withdrawal intervention) have been reported as  
4  
5 risk ratios (RR) with 95% CIs.  
6

7  
8 We used RevMan 5.3 and the intention-to-treat principle for all statistical analyses. We  
9  
10 conducted meta-analyses using the generic inverse variance method to allow pooling of effect  
11  
12 estimates. A random effects model was used given expected between-trial variations in  
13  
14 methodological, participant and medication characteristics between studies. We had originally  
15  
16 planned to pool data at various pre-specified time intervals, but all included studies had follow-up  
17  
18 between 6 to 12 months.  
19

20  
21 We assessed heterogeneity through visual inspection of forest plots and statistical tests. A  
22  
23 two-tailed test with p-value <0.10 was considered significant for all Chi-square analyses as per  
24  
25 recommendations from the Cochrane Handbook and the  $I^2$  was interpreted using the Cochrane  
26  
27 Collaboration thresholds.[15]  
28

29  
30 Heterogeneity was explored in subgroup analyses based on five a priori hypotheses  
31  
32 (Supplementary Table S1).[17] These included differences in baseline propensity for falls as  
33  
34 influenced by (1) a history of recurrent falls (e.g. known faller or not) or (2) place of residence or  
35  
36 care (e.g. community, long-term care); differences in the intervention as influenced by (3) specific  
37  
38 medication class(es) chosen for withdrawal and (4) preceding medication review by a clinician for  
39  
40 FRID withdrawal appropriateness; as well as differences in methodology based on (5) definitions  
41  
42 used for “falls” (e.g., observed vs. self-reported). We assessed the credibility of any apparent  
43  
44 subgroup effects using eleven previously published criteria recommended by the Cochrane  
45  
46 Handbook.[20]  
47  
48  
49

50  
51 A priori sensitivity analyses were conducted to explore the impact of low vs. high RoB  
52  
53 based on blinding and attrition. Studies did not report per-protocol results that would allow for our  
54  
55  
56  
57  
58  
59

1  
2  
3 planned intention-to-treat vs. per-protocol sensitivity analysis. The impact of using a fixed vs.  
4 random effects model was explored in a post hoc sensitivity analysis.  
5  
6

7  
8 The confidence in effect estimates for each reported outcome was assessed using the  
9 Grading of Recommendations, Assessment, Development and Evaluation (GRADE) approach.[21]  
10  
11  
12

### 13 14 **Patient and Public Involvement**

15  
16 Patients and the public were not involved in this review.  
17  
18  
19

## 20 21 **RESULTS**

22  
23 Of 891 citations identified, 31 were relevant for full text review and 6 met eligibility criteria  
24 ( $\kappa=0.79$ , 95% CI 0.51-1.00, substantial agreement). One study was available as an abstract, but it  
25 did not report its falls data.[22] Data were requested from the authors, but we did not receive a  
26 response. The PRISMA flow diagram summarizing our search results is shown in Figure 1.  
27  
28  
29  
30  
31

### 32 33 34 35 **Study Characteristics**

36  
37 The included trials in our review are described in Table 1.  
38  
39  
40  
41  
42  
43  
44  
45  
46  
47  
48  
49  
50  
51  
52  
53  
54  
55  
56  
57  
58  
59  
60

**Table 1: Characteristics of Included Studies**

| Author,                    | Study Design | Population                                                                                                                                                                                                                                                                                                                                                                                                | Sample Size                                                              | Age, Mean (SD) | Intervention                                                                                                                                                                                                                                                                                                                                                                  | Control                                                                                                                                                                                                                                                                                   | Study Outcomes                                                                                    |
|----------------------------|--------------|-----------------------------------------------------------------------------------------------------------------------------------------------------------------------------------------------------------------------------------------------------------------------------------------------------------------------------------------------------------------------------------------------------------|--------------------------------------------------------------------------|----------------|-------------------------------------------------------------------------------------------------------------------------------------------------------------------------------------------------------------------------------------------------------------------------------------------------------------------------------------------------------------------------------|-------------------------------------------------------------------------------------------------------------------------------------------------------------------------------------------------------------------------------------------------------------------------------------------|---------------------------------------------------------------------------------------------------|
| Blalock et al, 2010 [23]   | RCT          | <ol style="list-style-type: none"> <li>1) Community setting</li> <li>2) Age <math>\geq</math> 65</li> <li>3) Speak, read English</li> <li>4) <math>\geq</math> 4 prescription medications</li> <li>5) <math>\geq</math> 1 high falls-risk medication</li> <li>6) <math>\geq</math> 1 fall not attributable to syncope within 1 year preceding randomization</li> </ol>                                    | 186 (93 I/93 C)                                                          | 74.8 (6.9)     | <ol style="list-style-type: none"> <li>1) Pharmacist medication review</li> <li>2) Physician coordinated medication changes</li> <li>3) Fall brochure, home safety checklist</li> </ol>                                                                                                                                                                                       | <ol style="list-style-type: none"> <li>1) Fall brochure, home safety checklist</li> </ol>                                                                                                                                                                                                 | <ol style="list-style-type: none"> <li>1) Rate of falls</li> <li>2) Incidence of falls</li> </ol> |
| Campbell et al, 1999 [24]  | RCT          | <ol style="list-style-type: none"> <li>1) Community setting</li> <li>2) Age <math>\geq</math> 65</li> <li>3) Using benzodiazepine, other hypnotic, anti-depressant or major tranquilizer</li> <li>4) Ambulatory</li> <li>5) No physiotherapy</li> <li>6) General practitioner thought psychotropic medication withdrawal beneficial</li> </ol>                                                            | 93<br>Arm 1: 24 (I)<br>Arm 2: 24 (I)<br>Arm 3: 21 (C)*<br>Arm 4: 24 (C)* | 74.7 (7.2)     | <u>Arm 1</u><br><ol style="list-style-type: none"> <li>1) Withdrawal of psychotropic medication over 14 weeks</li> <li>2) Placebo substitution</li> <li>3) Home exercise programme</li> </ol> <u>Arm 2</u><br><ol style="list-style-type: none"> <li>1) Psychotropic medication withdrawal</li> <li>2) Placebo substitution</li> <li>3) No home exercise programme</li> </ol> | <u>Arm 3</u><br><ol style="list-style-type: none"> <li>1) No change in psychotropic medication</li> <li>2) Home exercise programme</li> </ol> <u>Arm 4</u><br><ol style="list-style-type: none"> <li>1) No change in psychotropic medication</li> <li>2) No exercise programme</li> </ol> | <ol style="list-style-type: none"> <li>1) Rate of falls</li> <li>2) Incidence of falls</li> </ol> |
| Mott et al, 2016 [25]      | Cluster RCT  | <ol style="list-style-type: none"> <li>1) Community setting</li> <li>2) Age <math>\geq</math> 65</li> <li>3) English-speaking</li> <li>4) Fall in last 12 months/fear of falling</li> <li>5) Workshop participation</li> <li>6) Capable of consent</li> </ol>                                                                                                                                             | 80 (39 I/41 C)                                                           | 75.6 (6.5)     | <ol style="list-style-type: none"> <li>1) FRID pharmacist review</li> <li>2) Medication-related action plan (MAP) developed by pharmacist for patient</li> <li>3) Pharmacist follow-up</li> <li>4) Patient given pamphlet</li> <li>5) describing the role of medications in falls and monthly falls calendars</li> </ol>                                                      | <ol style="list-style-type: none"> <li>1) Medications in falls pamphlet</li> </ol>                                                                                                                                                                                                        | <ol style="list-style-type: none"> <li>1) Rate of falls</li> <li>2) Incidence of falls</li> </ol> |
| Patterson et al, 2010 [26] | Cluster RCT  | <ol style="list-style-type: none"> <li>1) Nursing home setting with <math>\geq</math> 30 beds; not exclusive care of terminally ill</li> <li>2) Age <math>\geq</math> 65</li> </ol>                                                                                                                                                                                                                       | 334 (173 I/161 C)                                                        | 82.7 (8.4)     | <ol style="list-style-type: none"> <li>1) Monthly medication review via pharmacist for appropriateness</li> <li>2) Nurse and prescriber collaboration to improve medications</li> </ol>                                                                                                                                                                                       | <ol style="list-style-type: none"> <li>1) Usual care</li> </ol>                                                                                                                                                                                                                           | <ol style="list-style-type: none"> <li>1) Rate of falls</li> </ol>                                |
| Boyé et al, 2017 [27]      | RCT          | <ol style="list-style-type: none"> <li>1) Acute care emergency department setting; attended due to fall incident</li> <li>2) Age <math>\geq</math> 65</li> <li>3) <math>\geq</math> 1 FRID for <math>\geq</math> 2 weeks prior to the fall</li> <li>4) MMSE <math>\geq</math> 21/30</li> <li>5) Ambulates independently</li> <li>6) Community dwelling</li> <li>7) Informed consent by patient</li> </ol> | 612 (319 I/293 C)                                                        | 80.2 (7.3)     | <ol style="list-style-type: none"> <li>1) Investigator conducted FRID assessment, proposed changes</li> <li>2) Changes discussed with geriatrician and general practitioner/prescribing doctor</li> <li>3) If consensus, FRID discontinued, reduced dosage, substituted for potentially safer option</li> </ol>                                                               | <ol style="list-style-type: none"> <li>1) Usual care</li> </ol>                                                                                                                                                                                                                           | <ol style="list-style-type: none"> <li>1) Rate of falls</li> <li>2) Incidence of falls</li> </ol> |

Abbreviations: FRID = Fall-risk-increasing drug, I = Intervention, C = Control

\* Arm 3 and Arm 4 classified as controls due to lack of FRID withdrawal in these arms of the factorial design

1  
2  
3  
4  
5  
6  
7  
8  
9  
10  
11  
12  
13  
14  
15  
16  
17  
18  
19  
20  
21  
22  
23  
24  
25  
26  
27  
28  
29  
30  
31  
32  
33  
34  
35  
36  
37  
38  
39  
40  
41  
42  
43  
44  
45  
46  
47

For peer review only

1  
2  
3 Three studies were individually randomized, while two studies were cluster randomized by either  
4 nursing home or health centre. Studies ranged in size from 80 to 612 participants. With exception  
5 of one study[25], studies were multi-centre involving 144 sites and 4 countries. All were conducted  
6 in the community setting except for one conducted in long-term care.[26] Follow-up periods  
7 ranged from 6 to 12 months.  
8  
9

10  
11 Overall, there were 1305 participants across all trials. Most were female (>70%) and had a  
12 falls history (78.9%). Several key confounders were not reported in the studies including: (1)  
13 baseline number and types of FRIDs, (2) baseline number of medications, and (3) baseline number  
14 and types of co-morbidities. All these factors are thought to potentially modify falls risk.[28,29]  
15  
16

17 All interventions included a preceding assessment for FRID deprescribing appropriateness.  
18 This was conducted by physicians in 2 trials and pharmacists in 3 trials. Three trials tried to  
19 withdraw any FRID, while others focused on sedative-hypnotics, antipsychotics, or  
20 antidepressants. Successful discontinuation and adherence to deprescribing protocols were low in  
21 all studies. Rates of complete discontinuation of at least one FRID ranged from 10 to 40%.  
22  
23

24 In terms of our study outcomes, 4 trials measured the rate of falls and 4 measured falls  
25 incidence. One trial reported fall-related injuries.[23] Fall-related fractures, fall-related  
26 hospitalization or deprescribing-related adverse effects were not measured by any of the trials.  
27  
28  
29  
30  
31  
32  
33  
34

## 35 **Summary of Findings**

### 36 **Rate and Incidence of Falls**

37 Four studies reported the effect of deprescribing FRIDs on the rate of falls. Deprescribing  
38 FRIDs did not reduce the rate of falling (RaR 0.98, 95% CI 0.63 to 1.51; Figure 2 – Analysis 1.1).  
39  
40  
41  
42  
43  
44  
45  
46  
47  
48  
49  
50  
51  
52  
53  
54  
55  
56  
57  
58  
59  
60

1  
2  
3 Considerable statistical heterogeneity was present ( $\chi^2=17.47$ ,  $p=0.0006$ ,  $I^2=83\%$ ) and subsequently  
4 explored in subgroup analysis.  
5  
6

7  
8 Four studies reported the effect of deprescribing FRIDs on the risk of falls as measured by  
9 falls incidence. Deprescribing FRIDs did not reduce the incidence of falls (RR 1.04, 95% CI 0.86  
10 to 1.26,  $I^2 = 19\%$ ,  $\chi^2=3.70$ ,  $p = 0.30$ ; Figure 2 – Analysis 2.1). In absolute terms, there was a non-  
11 significant risk difference increase of 0.01 (95% CI -0.06 to 0.09,  $I^2 = 22\%$ ,  $p=0.76$ ; Figure 2 –  
12 Analysis 2.2)  
13  
14  
15  
16  
17  
18

### 19 20 21 ***Rate of Injurious Falls*** 22

23  
24 One trial reported the effect of deprescribing FRIDs on fall-related injuries.[23]  
25 Deprescribing FRIDs did not reduce the rate of fall-related injuries (RaR 0.89, 95% CI 0.57 to  
26 1.39; Figure 2 – Analysis 3.1). This trial did not report data that would allow for any of our pre-  
27 planned subgroup analyses.  
28  
29  
30  
31  
32

### 33 34 35 **Risk of Bias Assessment** 36

37  
38 Figure 3 summarizes our RoB assessments. All studies were deemed at high risk of bias in  
39 at least one domain. The overall mean weighted kappa across all assessments was 0.67 (moderate  
40 agreement). For individual RoB assessments, kappa ranged from 0 to 0.85. Inter-rater agreement  
41 is actually higher than indicated by the calculated scores due to the “kappa co-efficient  
42 paradox”. [30,31] Low kappas (e.g.  $\kappa=0$ ) occurred despite high levels of observed agreement (e.g.  
43  $\geq 80\%$  agreement) for two RoB assessments. True agreement is falsely attributed to chance  
44 agreement by the kappa calculation when there is substantial imbalance in marginal ratings.  
45  
46  
47  
48  
49  
50  
51  
52  
53  
54  
55  
56  
57  
58  
59  
60

1  
2  
3 For falls rate and incidence, all studies except one[24] were judged at high risk of bias for  
4 lack of blinding of participants, personnel and outcome assessors. It is unclear whether blinding  
5 could have impacted behaviour or perceptions (e.g. activity risk-level, nocebo effect). Risk of  
6 ascertainment bias was high in one study[26] (i.e. no standardized falls definition was used), but  
7 all other studies used methods accepted to be low risk of bias (i.e. falls recorded daily on postcards  
8 or calendars). Risk of attrition bias was deemed high in three studies based on high or unbalanced  
9 lost to follow-up rates.[23,24,27]  
10  
11  
12  
13  
14  
15  
16  
17  
18  
19  
20

### 21 ***Publication Bias***

22 Since less than 10 eligible studies were found, a funnel plot was not constructed due to an  
23 inability to make meaningful conclusions about publication bias.  
24  
25  
26  
27  
28  
29  
30

### 31 ***Subgroup Analyses and Exploration of Heterogeneity***

32 Our pre-specified subgroup analyses did not adequately explain the statistical  
33 heterogeneity observed results for the rate and incidence of falls (Supplementary Figure S2).  
34 Deprescribing FRIDs appeared more effective when a preceding medication review was conducted  
35 by physicians compared to pharmacists ( $p=0.0004$ ,  $I^2=91.9\%$ , Analysis 1.5), while psychotropic  
36 withdrawal appeared more effective than strategies withdrawing any FRID ( $p=0.08$ ,  $I^2=67.8\%$ ,  
37 Analysis 2.3). However, in both analyses, only 6 of 11 subgroup credibility criteria were met and  
38 each subgroup was limited to one trial with less than 100 participants (Supplementary Table S2).  
39 We, therefore, judged the credibility that these subgroup effects are real as poor and uncertain.  
40  
41  
42  
43  
44  
45  
46  
47  
48  
49  
50  
51  
52  
53  
54  
55  
56  
57  
58  
59  
60



1  
2  
3 The available data did not permit subgroup analyses by place of residence or falls  
4 ascertainment method. The other subgroup analyses showed no evidence of difference beyond that  
5 due to chance.  
6  
7  
8  
9

## 10 11 12 **Sensitivity Analyses** 13

14 Our sensitivity analyses are shown in Supplementary Figure S3. The incorporation of trials  
15 with high risk of performance bias appeared to mask the potential benefit of deprescribing FRIDs  
16 on reducing the incidence and rate of falls, while the trials with high risk of attrition bias appeared  
17 to mask a potential increase in falls rate with deprescribing FRIDs. These results should be  
18 interpreted cautiously and definitive conclusions cannot be made. Data from trials with low risk  
19 of performance bias were limited to one trial with less than 100 participants, and data from trials  
20 with low risk of attrition bias were limited to two trials with less than 450 participants overall.  
21  
22  
23  
24  
25  
26  
27  
28  
29

30 A post-hoc sensitivity analysis examining the impact of using a fixed vs. random effects  
31 model did not change conclusions regarding the effect of deprescribing FRIDs on the rate or  
32 incidence of falls.  
33  
34  
35  
36  
37  
38  
39

## 40 **Quality of Evidence** 41

42 The GRADE evidence profile is shown in Table 2.  
43  
44  
45  
46  
47  
48  
49  
50  
51  
52  
53  
54  
55  
56  
57  
58  
59  
60

**Table 2: GRADE Quality of Evidence Assessment**

| Certainty assessment  |                   |                      |                      |              |                      |                      | № of patients               |                    | Effect                                   |                   | Certainty        | Importance |
|-----------------------|-------------------|----------------------|----------------------|--------------|----------------------|----------------------|-----------------------------|--------------------|------------------------------------------|-------------------|------------------|------------|
| № of studies          | Study design      | Risk of bias         | Inconsistency        | Indirectness | Imprecision          | Other considerations | FRID deprescribing strategy | usual care         | Relative (95% CI)                        | Absolute (95% CI) |                  |            |
| Falls Rate            |                   |                      |                      |              |                      |                      |                             |                    |                                          |                   |                  |            |
| 4                     | randomised trials | serious <sup>a</sup> | serious <sup>b</sup> | not serious  | serious <sup>c</sup> | none                 | 353                         | 340                | <b>Rate ratio 0.98</b><br>(0.63 to 1.51) | -                 | ⊕○○○<br>VERY LOW | IMPORTANT  |
| Falls Incidence       |                   |                      |                      |              |                      |                      |                             |                    |                                          |                   |                  |            |
| 4                     | randomised trials | serious <sup>a</sup> | serious <sup>d</sup> | not serious  | serious <sup>c</sup> | none                 | 190/499<br>(38.1%)          | 170/472<br>(36.0%) | <b>RR 1.04</b><br>(0.86 to 1.26)         | -                 | ⊕○○○<br>VERY LOW | IMPORTANT  |
|                       |                   |                      |                      |              |                      |                      |                             | 33.7%              |                                          |                   |                  |            |
| Fall-Related Injuries |                   |                      |                      |              |                      |                      |                             |                    |                                          |                   |                  |            |
| 1                     | randomised trials | serious <sup>a</sup> | not serious          | not serious  | serious <sup>c</sup> | none                 | 93                          | 93                 | <b>Rate ratio 0.89</b><br>(0.57 to 1.39) | -                 | ⊕⊕○○<br>LOW      | CRITICAL   |

1  
2  
3 We judged the quality of evidence to be low or very low for all outcomes (falls rates, falls incidence  
4 and fall-related injuries) after rating down for risk of bias, inconsistency and imprecision.  
5  
6

7  
8 We believe the optimal information size (OIS) to make definitive conclusions on the effect  
9  
10 of deprescribing FRIDs has not yet been met as the body of evidence is based on fewer than 2000  
11 participants and less than 400 events.[32,33] This is based on the OIS calculation figure  
12 recommended by the GRADE guidelines using a well-established control falls event rate of 30%  
13 described in the literature and conservative relative risk reduction (RRR) of 20% (assuming  $\alpha =$   
14 0.05 and  $\beta = 0.2$ ).[33,34]  
15  
16  
17  
18  
19  
20  
21  
22  
23

## 24 **DISCUSSION**

25  
26 This systematic review sought to determine whether deprescribing FRIDs decreased the  
27 risk of falls in older adults and found that there is a lack of robust high-quality evidence to support  
28 or refute the deprescribing of FRIDs as an effective fall prevention strategy. Incorporating data  
29 from 5 RCTs involving 1305 participants aged  $\geq 65$  years, our meta-analyses indicate that a FRID  
30 deprescribing strategy did not significantly change the rate of falls (RaR 0.98, 95% CI 0.63 to  
31 1.51) nor the risk of falling (RD 0.01, 95% CI -0.06 to 0.09) over a 6 to 12-month follow-up period.  
32  
33 Although this intervention focuses on those medications thought to be associated with falls, the  
34 conclusions are similar to previous systematic reviews evaluating the effectiveness of medication  
35 reviews that had a broader focus on reducing polypharmacy and potentially inappropriate  
36 prescribing (i.e. not focused solely on FRIDs).[35,36]  
37  
38  
39  
40  
41  
42  
43  
44  
45  
46  
47  
48

49 There is also a significant absence of evidence for clinically- and patient-important  
50 outcomes such as fall-related injuries, fractures and hospitalizations. The only trial to date that  
51 evaluated the rate of fall-related injuries did not demonstrate a statistically significant effect (RaR  
52  
53  
54  
55  
56  
57  
58  
59  
60

1  
2  
3 0.89, 95% CI 0.57-1.39).[23] Our search found no trials measuring the impact on fall-related  
4 fractures, fall-related hospitalizations or adverse effects related to a FRID deprescribing strategy.  
5  
6 Although this may be rooted in the difficulty of conducting RCTs powered for such outcomes,  
7  
8 their measurement and reporting are still important to inform systematic review meta-analyses that  
9  
10 could lead to more precise estimates.  
11  
12  
13

14  
15 Based on low-quality evidence, it is unclear whether deprescribing FRIDs as a stand-alone  
16 intervention leads to any appreciable clinically important benefit or harm. Our current best effect  
17 estimates for falls rate and incidence are centred around no appreciable difference (i.e.  $RaR \approx 1$ ,  
18  $RR \approx 1$ ,  $RD \approx 0$ ). Although seemingly logical to assume, reducing isolated risk factors may not  
19 necessarily lead to a reduction in falls and fall-related complications. The absence of change in the  
20 incidence of hip fractures after statewide regulatory action on benzodiazepine prescribing in the  
21 United States that reduced benzodiazepine use by 60.3% is a real-world example of this  
22 phenomenon and the complexity of exposure-outcome relationships.[37]  
23  
24  
25  
26  
27  
28  
29  
30  
31  
32

33 Our findings likely reflect the multi-factorial nature of falls and the varying risk of different  
34 FRIDs. It is unclear as to what degree a particular risk factor or combination of risk factors (e.g.  
35 specific FRIDs) must be reduced to produce an appreciable change in falls. Medications may only  
36 have conditional or contributory causality to falls. It may be that medication-related interventions  
37 work best in combination with other interventions or only in specific contexts.  
38  
39  
40  
41  
42  
43  
44

45 Only one trial[24] included in our review demonstrated a statistically significant benefit  
46 with deprescribing FRIDs. This was also the only trial to use study capsules to operationalize  
47 blinded deprescribing of FRIDs in participants, research personnel and outcome assessors. Its  
48 results might be more reflective of the potential physiological effect of deprescribing FRIDs.  
49 However, the magnitude of benefit achievable in the “real world” setting may be closer to those  
50  
51  
52  
53  
54  
55  
56  
57  
58  
59  
60

1  
2  
3 seen in the unblinded trials due to the strong psychological and behavioural factors (e.g. nocebo  
4 effect) that may hinder successful deprescribing.  
5  
6

7  
8 These results raise several questions about the presumed effectiveness of deprescribing  
9 FRIDs as an isolated falls prevention strategy. Given the amount of resources being invested into  
10 falls prevention initiatives around the world, clinicians and organizations should examine: (1) what  
11 is the strength of evidence supporting their current activities, (2) whether these activities are cost-  
12 effective, and (3) whether resources are being appropriately prioritized to those interventions  
13 shown to provide the most value. This should also be applied to what is being required of  
14 healthcare organizations in national accreditation standards (e.g. Joint Commission, Accreditation  
15 Canada) to help direct and encourage optimal use of limited healthcare resources.  
16  
17  
18  
19  
20  
21  
22  
23  
24  
25

26 Clinicians and policy-makers need to consider the lack of strong evidence for deprescribing  
27 FRIDs as an isolated intervention for the specific purpose of reducing falls, particularly in patients  
28 who may be very reluctant or who have strong indications for specific FRIDs. FRID reduction is  
29 one out of many possible interventions that need to be considered. As with prescribing medications,  
30 deprescribing is a skill and comes with the potential for harm as well as benefit.[38] Thoughtful  
31 consideration of the goals, appropriateness and safety of deprescribing is important.[39] Our  
32 results highlight the need for a comprehensive and individualized approach to falls. Multi-  
33 component interventions are ideal, but interventions may need to be prioritized depending on time,  
34 resources and context.  
35  
36  
37  
38  
39  
40  
41  
42  
43  
44  
45

46  
47 Despite insufficient evidence to support or refute the deprescribing of FRIDs for falls  
48 prevention, our results do not mean that clinicians should avoid deprescribing FRIDs. There may  
49 be many other reasons to deprescribe these medications. These include avoidance of adverse drug  
50 events, improvements in cognition, increased medication adherence and drug costs savings. It is  
51  
52  
53  
54  
55  
56  
57  
58  
59  
60

1  
2  
3 also unclear whether medication review and management with a broader focus on reducing  
4 polypharmacy and potentially inappropriate prescribing in older adults may be beneficial in  
5 preventing falls.  
6  
7  
8  
9

10 Our review highlights the need for future FRID deprescribing trials that evaluate patient-  
11 important outcomes (e.g. injuries, fractures and hospitalizations). Greater attention to optimal  
12 design and reporting is needed to minimize risk of bias and enhance our interpretation of the results.  
13 Examples include improved reporting of confounding baseline characteristics and intervention  
14 fidelity (e.g. number and types of FRIDs, degree and duration of dose reduction). Deprescribing  
15 is challenging and extra measures are likely needed to improve successful intervention adherence  
16 and follow-up.  
17  
18  
19  
20  
21  
22  
23  
24  
25  
26  
27

## 28 **STRENGTHS AND LIMITATIONS**

29  
30 Our review has limitations. There was variation in the operationalization of FRID  
31 deprescribing and degree of success achieved (e.g. dose reduction only, completion  
32 discontinuation, non-adherence). This presumably makes the detection of any potential benefit less  
33 likely and our conclusions more conservative. However, the effect estimates are likely more  
34 indicative of what might be expected outside of the research setting. These phenomena likely  
35 represent the real-life challenges of deprescribing (especially with certain types of FRIDs such as  
36 psychotropics or opioids). Moreover, our ability to assess for confounders modifying falls risk was  
37 limited due to inconsistent reporting of relevant baseline characteristics and lack of patient-level  
38 data. Lastly, our ability to make definitive conclusions is limited because the total sample size  
39 across studies for each outcome did not yet meet our calculated estimate for the required optimal  
40 information size.  
41  
42  
43  
44  
45  
46  
47  
48  
49  
50  
51  
52  
53  
54  
55  
56  
57  
58  
59  
60

1  
2  
3 Our review has several strengths. First, our search was comprehensive and we included a  
4 rigorous grey literature search for unpublished studies. Second, we employed optimal analytical  
5 and interpretational approaches including duplicate assessment, subgroup credibility criteria and  
6 optimal information size considerations. Third, unlike previous medication-focused reviews, we  
7 applied the GRADE approach to assess the quality of evidence and our degree of confidence in  
8 the results.  
9  
10  
11  
12  
13  
14  
15  
16  
17  
18

## 19 CONCLUSIONS

20  
21 Our systematic review found that deprescribing FRIDs as an isolated strategy results in  
22 little to no difference in the rate and risk of falls or falls-related injuries, but the evidence is still  
23 sparse and very low quality. Additional well-designed studies are needed to reach the optimal  
24 information size to reduce uncertainty about this intervention and establish its relative importance  
25 in the range of possible interventions that can be employed by clinicians and health systems to  
26 reduce falls.  
27  
28  
29  
30  
31  
32  
33  
34  
35  
36  
37

## 38 Acknowledgements:

39  
40 The authors would like to thank Lois Cottrell, medical librarian at St. Joseph's Healthcare  
41 Hamilton, Charlton Campus, Hamilton, Ontario, Canada and Andrea McLellan, Head of  
42 Collection and Technical Services, School of Medicine liaison, at McMaster University, Hamilton,  
43 Ontario, Canada, for their assistance with the development of the search strategy.  
44  
45  
46  
47  
48  
49  
50

## 51 Author Contributions:

1  
2  
3 JL conceptualized the study. JL and AH designed and developed the protocol. RP and EW assisted  
4 with citation review. RP and AN assisted with data extraction, risk of bias assessment and certainty  
5 of evidence grading. All authors contributed to the analysis and interpretation of results. JL drafted  
6 the initial manuscript and all authors contributed to its revision and final approval.  
7  
8  
9  
10  
11  
12  
13

#### 14 **Funding:**

15  
16 This research received no specific grant from any funding agency in the public, commercial or  
17 not-for-profit sectors.  
18  
19  
20  
21  
22  
23

#### 24 **Competing Interests:**

25  
26 The authors have no potential conflicts of interest to declare.  
27  
28  
29  
30

#### 31 **Patient Consent for Publication:**

32  
33 None required.  
34  
35  
36  
37

#### 38 **Data Sharing Statement:**

39  
40 No unpublished data are available.  
41  
42  
43  
44  
45  
46  
47  
48  
49  
50  
51  
52  
53  
54  
55  
56  
57  
58  
59  
60



**REFERENCES:**

- 1 Hill KD, Wee R. Psychotropic drug-induced falls in older people: a review of interventions aimed at reducing the problem. *Drugs Aging* 2012;**29**:15–30. doi:10.2165/11598420-000000000-00000
- 2 Florence CS, Bergen G, Atherly A, *et al.* Medical Costs of Fatal and Nonfatal Falls in Older Adults. *J Am Geriatr Soc* 2018;**66**:693–8. doi:10.1111/jgs.15304
- 3 National Institute for Health and Care Excellence. Falls in older people: assessing risk and prevention. 2013.
- 4 Public Health Agency of Canada. Seniors' Falls in Canada. 2014.
- 5 Summary of the Updated American Geriatrics Society/British Geriatrics Society clinical practice guideline for prevention of falls in older persons. *J Am Geriatr Soc* 2011;**59**:148–57. doi:10.1111/j.1532-5415.2010.03234.x
- 6 Guirguis-Blake JM, Michael YL, Perdue LA, *et al.* Interventions to Prevent Falls in Older Adults. *JAMA* 2018;**319**:1705. doi:10.1001/jama.2017.21962
- 7 Campbell AJ, Robertson MC. Fall Prevention: Single or Multiple Interventions? Single Interventions for Fall Prevention. *J Am Geriatr Soc* 2013;**61**:281–4. doi:10.1111/jgs.12095\_2
- 8 Tricco AC, Thomas SM, Veroniki AA, *et al.* Comparisons of Interventions for Preventing Falls in Older Adults. *JAMA* 2017;**318**:1687. doi:10.1001/jama.2017.15006
- 9 Leipzig RM, Cumming RG, Tinetti ME. Drugs and falls in older people: a systematic review and meta-analysis: I. Psychotropic drugs. *J Am Geriatr Soc* 1999;**47**:30–9.
- 10 Leipzig RM, Cumming RG, Tinetti ME. Drugs and falls in older people: a systematic review and meta-analysis: II. Cardiac and analgesic drugs. *J Am Geriatr Soc* 1999;**47**:40–

- 1  
2  
3 50.  
4  
5  
6 11 Woolcott JC, Richardson KJ, Wiens MO, *et al.* Meta-analysis of the impact of 9  
7 medication classes on falls in elderly persons. *Arch Intern Med* 2009;**169**:1952–60.  
8 doi:10.1001/archinternmed.2009.357  
9  
10  
11  
12 12 de Vries M, Seppala LJ, Daams JG, *et al.* Fall-Risk-Increasing Drugs: A Systematic  
13 Review and Meta-Analysis: I. Cardiovascular Drugs. *J Am Med Dir Assoc*  
14 2018;**19**:371.e1-371.e9. doi:10.1016/j.jamda.2017.12.013  
15  
16  
17  
18  
19 13 Seppala LJ, Wermelink AMAT, de Vries M, *et al.* Fall-Risk-Increasing Drugs: A  
20 Systematic Review and Meta-Analysis: II. Psychotropics. *J Am Med Dir Assoc*  
21 2018;**19**:371.e11-371.e17. doi:10.1016/j.jamda.2017.12.098  
22  
23  
24  
25  
26 14 Seppala LJ, van de Glind EMM, Daams JG, *et al.* Fall-Risk-Increasing Drugs: A  
27 Systematic Review and Meta-analysis: III. Others. *J Am Med Dir Assoc* 2018;**19**:372.e1-  
28 372.e8. doi:10.1016/j.jamda.2017.12.099  
29  
30  
31  
32  
33 15 The Cochrane Collaboration. *Cochrane Handbook for Systematic Reviews of Interventions*  
34 *Version 5.1.0 [updated March 2011]*. 2011.  
35  
36  
37  
38 16 Moher D, Liberati A, Tetzlaff J, *et al.* Preferred reporting items for systematic reviews and  
39 meta-analyses: the PRISMA statement. *Ann Intern Med* 2009;**151**:264–9, W64.  
40  
41  
42  
43 17 Lee JY, Holbrook A. The efficacy of fall-risk-increasing drug (FRID) withdrawal for the  
44 prevention of falls and fall-related complications: protocol for a systematic review and  
45 meta-analysis. *Syst Rev* 2017;**6**:33.  
46  
47  
48  
49 18 Higgins JPT, Altman DG, Gøtzsche PC, *et al.* The Cochrane Collaboration's tool for  
50 assessing risk of bias in randomised trials. *BMJ* 2011;**343**:d5928.  
51  
52  
53  
54 19 Akl EA, Sun X, Busse JW, *et al.* Specific instructions for estimating unclearly reported  
55  
56  
57  
58  
59  
60

- 1  
2  
3 blinding status in randomized trials were reliable and valid. *J Clin Epidemiol*  
4 2012;**65**:262–7. doi:10.1016/j.jclinepi.2011.04.015  
5  
6  
7  
8 20 Sun X, Briel M, Walter SD, *et al*. Is a subgroup effect believable? Updating criteria to  
9 evaluate the credibility of subgroup analyses. *BMJ* 2010;**340**:c117.  
10  
11  
12 21 Guyatt G, Oxman AD, Akl EA, *et al*. GRADE guidelines: 1. Introduction-GRADE  
13 evidence profiles and summary of findings tables. *J Clin Epidemiol* 2011;**64**:383–94.  
14  
15  
16  
17 22 Streim JE, Filippo S, Have T, *et al*. Antidepressant discontinuation associated with  
18 cognitive decline in older adult residents of long-term care facilities. *Am J Geriatr*  
19 *psychiatry* 2012;**20**:S147–8. doi:10.1097/01.JGP.0000413064.91948.aa  
20  
21  
22  
23 23 Blalock SJ, Casteel C, Roth MT, *et al*. Impact of enhanced pharmacologic care on the  
24 prevention of falls: a randomized controlled trial. *Am J Geriatr Pharmacother*  
25 2010;**8**:428–40. doi:10.1016/j.amjopharm.2010.09.002  
26  
27  
28  
29  
30  
31 24 Campbell AJ, Robertson MC, Gardner MM, *et al*. Psychotropic medication withdrawal  
32 and a home-based exercise program to prevent falls: a randomized, controlled trial. *J Am*  
33 *Geriatr Soc* 1999;**47**:850–3.  
34  
35  
36  
37 25 Mott DA, Martin B, Breslow R, *et al*. Impact of a medication therapy management  
38 intervention targeting medications associated with falling: Results of a pilot study. *J Am*  
39 *Pharm Assoc (2003)* 2016;**56**:22–8.  
40  
41  
42  
43  
44 26 Patterson SM, Hughes CM, Crealey G, *et al*. An evaluation of an adapted U.S. model of  
45 pharmaceutical care to improve psychoactive prescribing for nursing home residents in  
46 northern ireland (fleetwood northern ireland study). *J Am Geriatr Soc* 2010;**58**:44–53.  
47  
48  
49  
50  
51  
52  
53  
54 27 Boyé NDA, van der Velde N, de Vries OJ, *et al*. Effectiveness of medication withdrawal  
55  
56  
57  
58  
59  
60

- 1  
2  
3 in older fallers: results from the Improving Medication Prescribing to reduce Risk Of  
4 FALLs (IMPROVeFALL) trial. *Age Ageing* 2017;**46**:142–6. doi:10.1093/ageing/afw161  
5  
6  
7  
8 28 Tinetti M, Kumar C. The Patient Who Falls. *JAMA J Am Med Assoc* 2010;**303**:273–4.  
9  
10 doi:10.1001/jama.2009.2024  
11  
12 29 Chen Y, Zhu L-L, Zhou Q. Effects of drug pharmacokinetic/pharmacodynamic properties,  
13  
14 characteristics of medication use, and relevant pharmacological interventions on fall risk  
15  
16 in elderly patients. *Ther Clin Risk Manag* 2014;**10**:437–48. doi:10.2147/TCRM.S63756  
17  
18  
19 30 Feinstein AR, Cicchetti D V. High agreement but low kappa: I. The problems of two  
20  
21 paradoxes. *J Clin Epidemiol* 1990;**43**:543–9.  
22  
23  
24 31 Tang W, Hu J, Zhang H, *et al*. Kappa coefficient: a popular measure of rater agreement.  
25  
26 *Shanghai Arch psychiatry* 2015;**27**:62–7. doi:10.11919/j.issn.1002-0829.215010  
27  
28  
29 32 Ioannidis J, Lau J. Evolution of treatment effects over time: empirical insight from  
30  
31 recursive cumulative metaanalyses. *Proc Natl Acad Sci U S A* 2001;**98**:831–6.  
32  
33 doi:10.1073/pnas.021529998  
34  
35 33 Guyatt GH, Oxman AD, Kunz R, *et al*. GRADE guidelines 6. Rating the quality of  
36  
37 evidence--imprecision. *J Clin Epidemiol* 2011;**64**:1283–93.  
38  
39 doi:10.1016/j.jclinepi.2011.01.012  
40  
41  
42 34 O’Loughlin JL, Robitaille Y, Boivin JF, *et al*. Incidence of and risk factors for falls and  
43  
44 injurious falls among the community-dwelling elderly. *Am J Epidemiol* 1993;**137**:342–54.  
45  
46  
47 35 Gillespie LD, Robertson MC, Gillespie WJ, *et al*. Interventions for preventing falls in  
48  
49 older people living in the community. *Cochrane database Syst Rev* 2012;**9**:CD007146.  
50  
51 doi:10.1002/14651858.CD007146.pub3  
52  
53  
54 36 Guirguis-Blake JM, Michael YL, Perdue LA, *et al*. *Interventions to Prevent Falls in*  
55  
56  
57  
58  
59  
60

- 1  
2  
3 *Community-Dwelling Older Adults: A Systematic Review for the U.S. Preventive Services*  
4 *Task Force*. Agency for Healthcare Research and Quality (US) 2018.  
5  
6  
7  
8 37 Wagner AK, Ross-Degnan D, Gurwitz JH, *et al*. Effect of New York State regulatory  
9  
10 action on benzodiazepine prescribing and hip fracture rates. *Ann Intern Med* 2007;**146**:96–  
11  
12 103.  
13  
14 38 Reeve E, Moriarty F, Nahas R, *et al*. A narrative review of the safety concerns of  
15  
16 deprescribing in older adults and strategies to mitigate potential harms. *Expert Opin Drug*  
17  
18 *Saf* 2018;**17**:39–49. doi:10.1080/14740338.2018.1397625  
19  
20  
21 39 Lee JY, Farrell B, Holbrook AM. De-prescribing benzodiazepine receptor agonists taken  
22  
23 for insomnia: a review and key messages from practice guidelines. *Polish Arch Intern*  
24  
25 *Med* 2018;**129**:839–45. doi:10.20452/pamw.4391  
26  
27  
28  
29  
30  
31  
32  
33  
34  
35  
36  
37  
38  
39  
40  
41  
42  
43  
44  
45  
46  
47  
48  
49  
50  
51  
52  
53  
54  
55  
56  
57  
58  
59  
60

1  
2  
3 **FIGURES**  
4

5 **Figure 1:** PRISMA Flow Diagram of Study Selection Process  
6

7 **Figure 2:** Forest Plots of FRID Withdrawal versus Usual Care  
8

9 **Figure 3:** Risk of Bias Assessments  
10  
11  
12  
13  
14  
15  
16  
17  
18  
19  
20  
21  
22  
23  
24  
25  
26  
27  
28  
29  
30  
31  
32  
33  
34  
35  
36  
37  
38  
39  
40  
41  
42  
43  
44  
45  
46  
47  
48  
49  
50  
51  
52  
53  
54  
55  
56  
57  
58  
59  
60

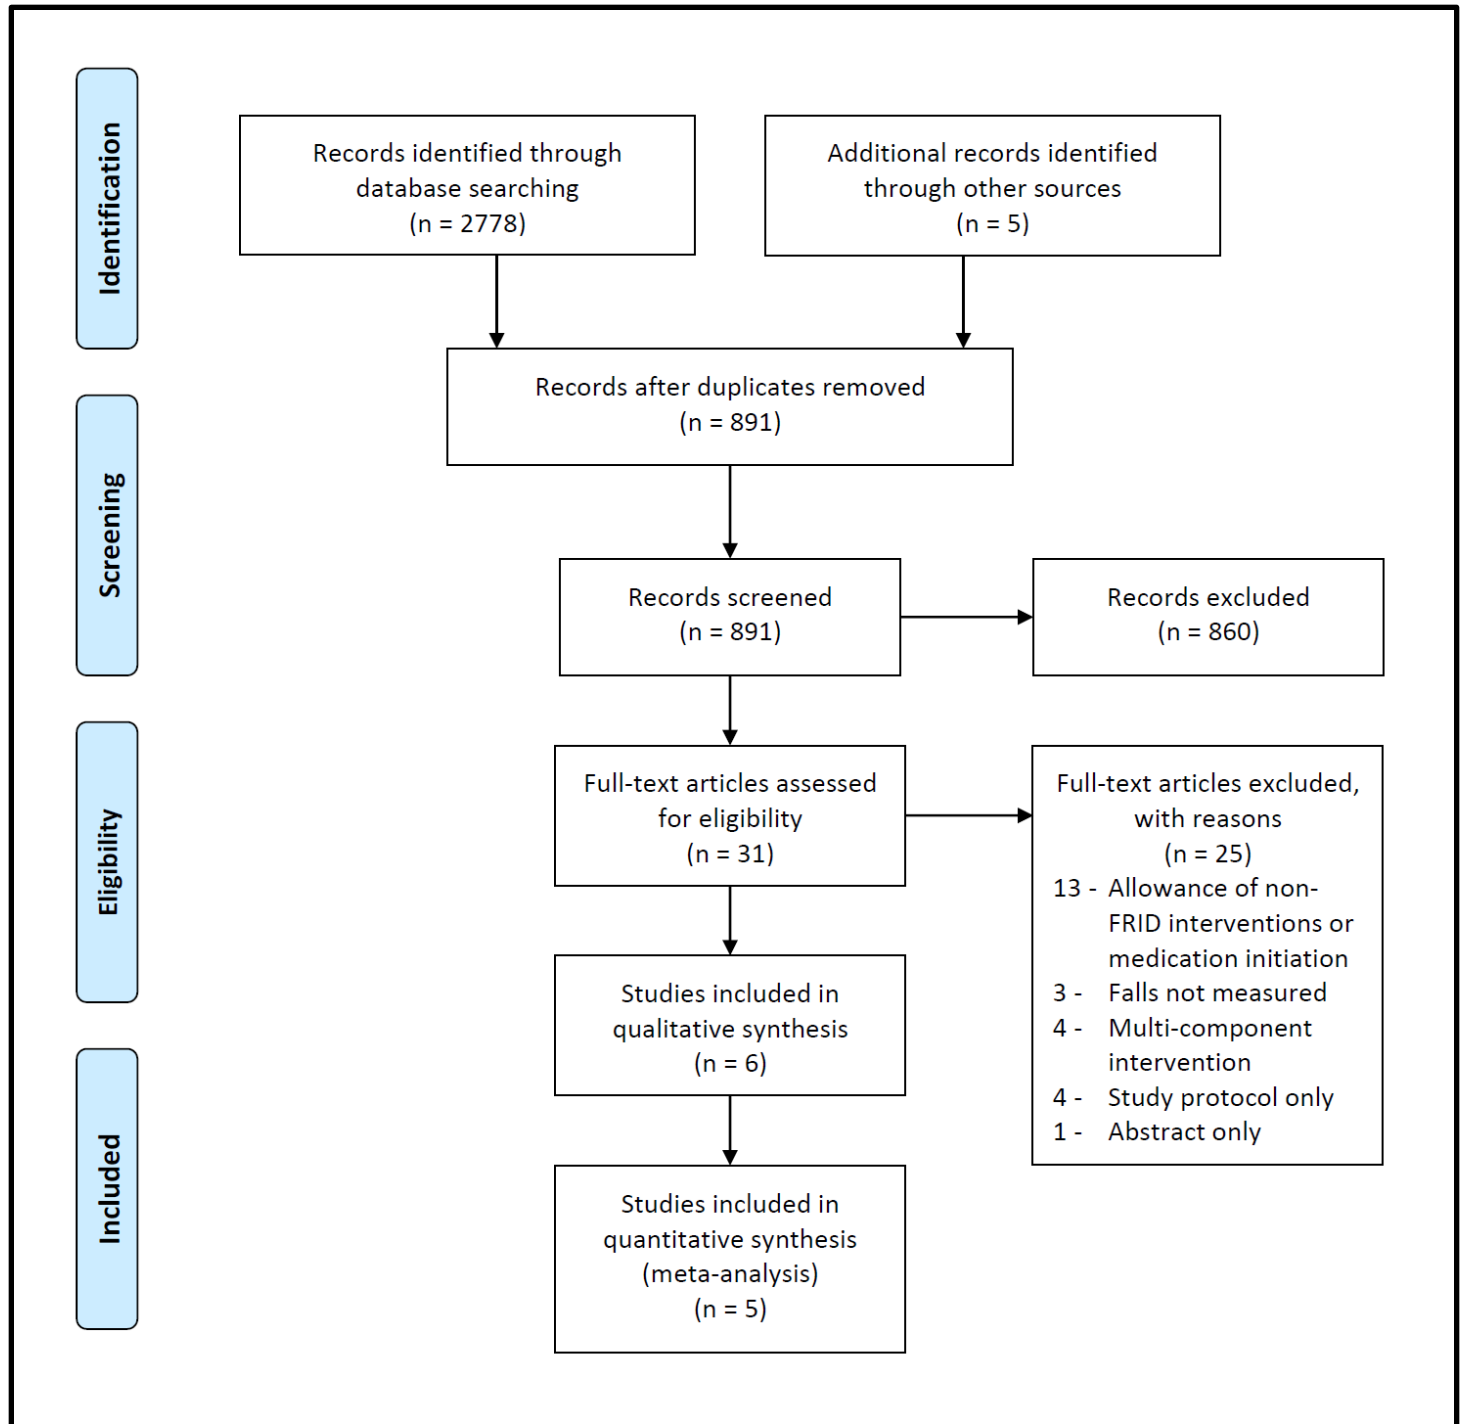

### 1.1 Falls Rate

1  
2  
3  
4  
5  
6  
7  
8  
9  
10  
11

| Study or Subgroup     | FRID Withdrawal |        | Usual Care |            | Weight        | Rate Ratio         |                     | Year |
|-----------------------|-----------------|--------|------------|------------|---------------|--------------------|---------------------|------|
|                       | log[Rate Ratio] | SE     | Total      | Total      |               | IV, Random, 95% CI | Year                |      |
| Campbell 1999         | -0.8023         | 0.2434 | 48         | 45         | 23.4%         | 0.45               | [0.28, 0.72]        | 1999 |
| Patterson 2010        | 0.3549          | 0.1465 | 173        | 161        | 28.4%         | 1.43               | [1.07, 1.90]        | 2010 |
| Blalock 2010          | 0.003           | 0.1117 | 93         | 93         | 29.9%         | 1.00               | [0.81, 1.25]        | 2010 |
| Mott 2016             | 0.3379          | 0.3416 | 39         | 41         | 18.4%         | 1.40               | [0.72, 2.74]        | 2016 |
| <b>Total (95% CI)</b> |                 |        | <b>353</b> | <b>340</b> | <b>100.0%</b> | <b>0.98</b>        | <b>[0.63, 1.51]</b> |      |

Heterogeneity: Tau<sup>2</sup> = 0.15; Chi<sup>2</sup> = 17.47, df = 3 (P = 0.0006); I<sup>2</sup> = 83%  
Test for overall effect: Z = 0.11 (P = 0.92)

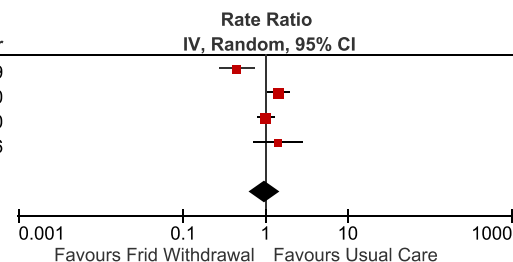

### 2.1 Falls Incidence – Risk Ratio

12  
13  
14  
15  
16  
17  
18  
19  
20  
21  
22  
23  
24

| Study or Subgroup     | FRID Withdrawal |            | Usual Care |            | Weight        | Risk Ratio          |                     |
|-----------------------|-----------------|------------|------------|------------|---------------|---------------------|---------------------|
|                       | Events          | Total      | Events     | Total      |               | M-H, Random, 95% CI | M-H, Random, 95% CI |
| Campbell 1999         | 11              | 48         | 17         | 45         | 8.4%          | 0.61                | [0.32, 1.15]        |
| Blalock 2010          | 53              | 93         | 52         | 93         | 39.3%         | 1.02                | [0.79, 1.31]        |
| Mott 2016             | 11              | 39         | 10         | 41         | 6.4%          | 1.16                | [0.55, 2.41]        |
| Boyé 2017             | 115             | 319        | 91         | 293        | 45.9%         | 1.16                | [0.93, 1.45]        |
| <b>Total (95% CI)</b> |                 | <b>499</b> |            | <b>472</b> | <b>100.0%</b> | <b>1.04</b>         | <b>[0.86, 1.26]</b> |

Total events: FRID Withdrawal 190, Usual Care 170  
Heterogeneity: Tau<sup>2</sup> = 0.01; Chi<sup>2</sup> = 3.70, df = 3 (P = 0.30); I<sup>2</sup> = 19%  
Test for overall effect: Z = 0.44 (P = 0.66)

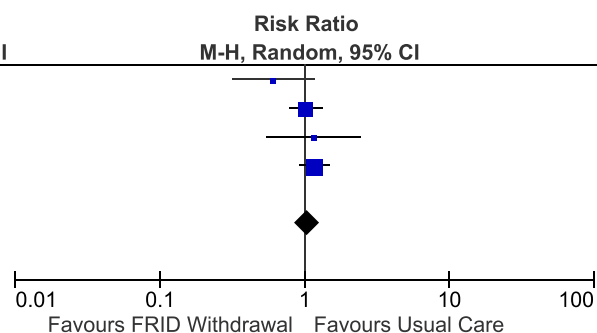

### 2.2 Falls Incidence – Risk Difference

25  
26  
27  
28  
29  
30  
31  
32  
33  
34  
35  
36  
37  
38

| Study or Subgroup     | FRID Withdrawal |            | Usual Care |            | Weight        | Risk Difference     |                      |
|-----------------------|-----------------|------------|------------|------------|---------------|---------------------|----------------------|
|                       | Events          | Total      | Events     | Total      |               | M-H, Random, 95% CI | M-H, Random, 95% CI  |
| Campbell 1999         | 11              | 48         | 17         | 45         | 14.2%         | -0.15               | [-0.33, 0.04]        |
| Blalock 2010          | 53              | 93         | 52         | 93         | 21.8%         | 0.01                | [-0.13, 0.15]        |
| Mott 2016             | 11              | 39         | 10         | 41         | 13.2%         | 0.04                | [-0.15, 0.23]        |
| Boyé 2017             | 115             | 319        | 91         | 293        | 50.9%         | 0.05                | [-0.02, 0.12]        |
| <b>Total (95% CI)</b> |                 | <b>499</b> |            | <b>472</b> | <b>100.0%</b> | <b>0.01</b>         | <b>[-0.06, 0.09]</b> |

Total events: FRID Withdrawal 190, Usual Care 170  
Heterogeneity: Tau<sup>2</sup> = 0.00; Chi<sup>2</sup> = 3.86, df = 3 (P = 0.28); I<sup>2</sup> = 22%  
Test for overall effect: Z = 0.31 (P = 0.76)

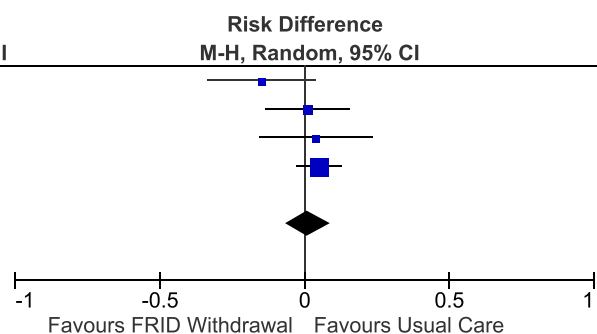

### 3.1 Fall-Related Injuries

40  
41  
42  
43  
44  
45  
46  
47  
48

| Study or Subgroup     | FRID Withdrawal |        | Usual Care |           | Weight        | Rate Ratio         |                     |      |
|-----------------------|-----------------|--------|------------|-----------|---------------|--------------------|---------------------|------|
|                       | log[Rate Ratio] | SE     | Total      | Total     |               | IV, Random, 95% CI | Year                |      |
| Blalock 2010          | -0.1165         | 0.2273 | 93         | 93        | 100.0%        | 0.89               | [0.57, 1.39]        | 2010 |
| <b>Total (95% CI)</b> |                 |        | <b>93</b>  | <b>93</b> | <b>100.0%</b> | <b>0.89</b>        | <b>[0.57, 1.39]</b> |      |

Heterogeneity: Not applicable  
Test for overall effect: Z = 0.51 (P = 0.61)

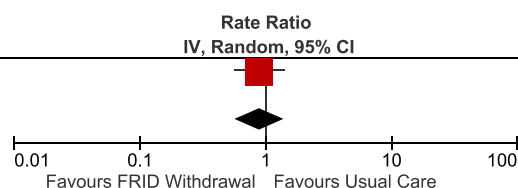

49  
50  
51  
52





|                | Random sequence generation (selection bias) | Allocation concealment (selection bias) | Blinding of participants and personnel (performance bias) | Blinding of outcome assessment (detection bias) | Incomplete outcome data (attrition bias) | Selective reporting (reporting bias) | Other bias |
|----------------|---------------------------------------------|-----------------------------------------|-----------------------------------------------------------|-------------------------------------------------|------------------------------------------|--------------------------------------|------------|
| Blalock 2010   | +                                           | +                                       | -                                                         | -                                               | -                                        | +                                    | +          |
| Boyé 2017      | +                                           | +                                       | -                                                         | -                                               | -                                        | +                                    | +          |
| Campbell 1999  | +                                           | +                                       | +                                                         | +                                               | -                                        | +                                    | +          |
| Mott 2016      | -                                           | -                                       | -                                                         | -                                               | +                                        | +                                    | +          |
| Patterson 2010 | +                                           | +                                       | -                                                         | -                                               | +                                        | +                                    | +          |

## Supplementary Figure S1: OVID Medline Search Strategy

Database(s): OVID Medline Epub Ahead of Print, In-Process & Other Non-Indexed Citations, Ovid MEDLINE(R) Daily and Ovid MEDLINE(R) 1946 to Present  
Search Strategy:

| #  | Searches                                                                                                                                                                                                                                                                                                                                                                                                                                                                                                                   |
|----|----------------------------------------------------------------------------------------------------------------------------------------------------------------------------------------------------------------------------------------------------------------------------------------------------------------------------------------------------------------------------------------------------------------------------------------------------------------------------------------------------------------------------|
| 1  | exp Accidental Falls/pc [Prevention & Control]                                                                                                                                                                                                                                                                                                                                                                                                                                                                             |
| 2  | fall.mp. [mp=title, abstract, original title, name of substance word, subject heading word, floating sub-heading word, keyword heading word, protocol supplementary concept word, rare disease supplementary concept word, unique identifier, synonyms]                                                                                                                                                                                                                                                                    |
| 3  | falls.mp. [mp=title, abstract, original title, name of substance word, subject heading word, floating sub-heading word, keyword heading word, protocol supplementary concept word, rare disease supplementary concept word, unique identifier, synonyms]                                                                                                                                                                                                                                                                   |
| 4  | exp Deprescriptions/                                                                                                                                                                                                                                                                                                                                                                                                                                                                                                       |
| 5  | ((medicat* or drug*) adj3 (deprescrib* or withdraw* or cessat* or stop* or discontin*)) .mp. [mp=title, abstract, original title, name of substance word, subject heading word, floating sub-heading word, keyword heading word, protocol supplementary concept word, rare disease supplementary concept word, unique identifier, synonyms]                                                                                                                                                                                |
| 6  | ((antihypertensive* or diuretic* or beta-blocker* or sedative* or hypnotic* or neuroleptic* or antipsychotic* or antidepressant* or benzodiazepine* or narcotic* or opioid* or narcotic* or NSAID*) adj3 (deprescrib* or withdraw* or cessat* or stop* or discontin*)) .mp. [mp=title, abstract, original title, name of substance word, subject heading word, floating sub-heading word, keyword heading word, protocol supplementary concept word, rare disease supplementary concept word, unique identifier, synonyms] |
| 7  | fall-risk increasing drugs.mp.                                                                                                                                                                                                                                                                                                                                                                                                                                                                                             |
| 8  | FRID.mp.                                                                                                                                                                                                                                                                                                                                                                                                                                                                                                                   |
| 9  | ((medicat* or drug*) adj3 (review* or improv* or program*)) .mp. [mp=title, abstract, original title, name of substance word, subject heading word, floating sub-heading word, keyword heading word, protocol supplementary concept word, rare disease supplementary concept word, unique identifier, synonyms]                                                                                                                                                                                                            |
| 10 | exp "Drug-Related Side Effects and Adverse Reactions"/pc [Prevention & Control]                                                                                                                                                                                                                                                                                                                                                                                                                                            |
| 11 | exp Medication Therapy Management/ or exp "Drug Utilization Review"/                                                                                                                                                                                                                                                                                                                                                                                                                                                       |
| 12 | 4 or 5 or 6 or 7 or 8 or 9 or 10 or 11                                                                                                                                                                                                                                                                                                                                                                                                                                                                                     |
| 13 | 1 or 2 or 3                                                                                                                                                                                                                                                                                                                                                                                                                                                                                                                |
| 14 | 12 and 13                                                                                                                                                                                                                                                                                                                                                                                                                                                                                                                  |
| 15 | remove duplicates from 14                                                                                                                                                                                                                                                                                                                                                                                                                                                                                                  |
| 16 | exp Clinical Trial/                                                                                                                                                                                                                                                                                                                                                                                                                                                                                                        |
| 17 | (randomized or randomised).ab,ti.                                                                                                                                                                                                                                                                                                                                                                                                                                                                                          |
| 18 | placebo.ab,ti.                                                                                                                                                                                                                                                                                                                                                                                                                                                                                                             |
| 19 | randomly.ab,ti.                                                                                                                                                                                                                                                                                                                                                                                                                                                                                                            |
| 20 | groups.ab,ti.                                                                                                                                                                                                                                                                                                                                                                                                                                                                                                              |
| 21 | randomized controlled trial.pt.                                                                                                                                                                                                                                                                                                                                                                                                                                                                                            |
| 22 | controlled clinical trial.pt.                                                                                                                                                                                                                                                                                                                                                                                                                                                                                              |
| 23 | 16 or 17 or 18 or 19 or 20 or 21 or 22                                                                                                                                                                                                                                                                                                                                                                                                                                                                                     |
| 24 | 15 and 23                                                                                                                                                                                                                                                                                                                                                                                                                                                                                                                  |

## Supplementary Figure S2: Subgroup Analyses

### 1.2 Falls Rate - Known vs. Unknown Faller



### 1.3 Falls Rate - Community vs. Institutionalized



### 1.4 Falls Rate - Psychotropic Withdrawal vs. Any FRID Withdrawal



### 1.5 Falls Rate - Physician vs. Pharmacist Medication Review

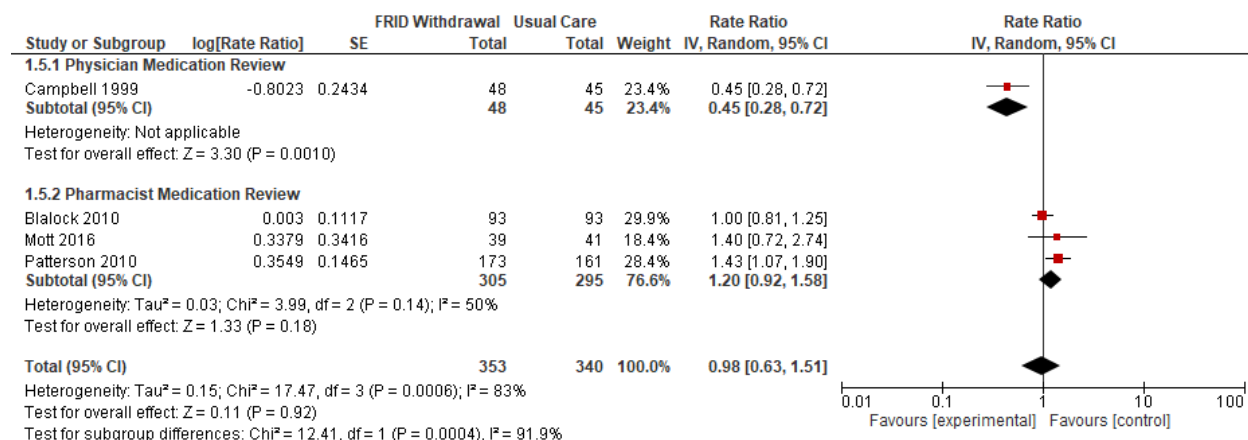

### 1.6 Falls Rate - Observed vs. Self-Reported Falls

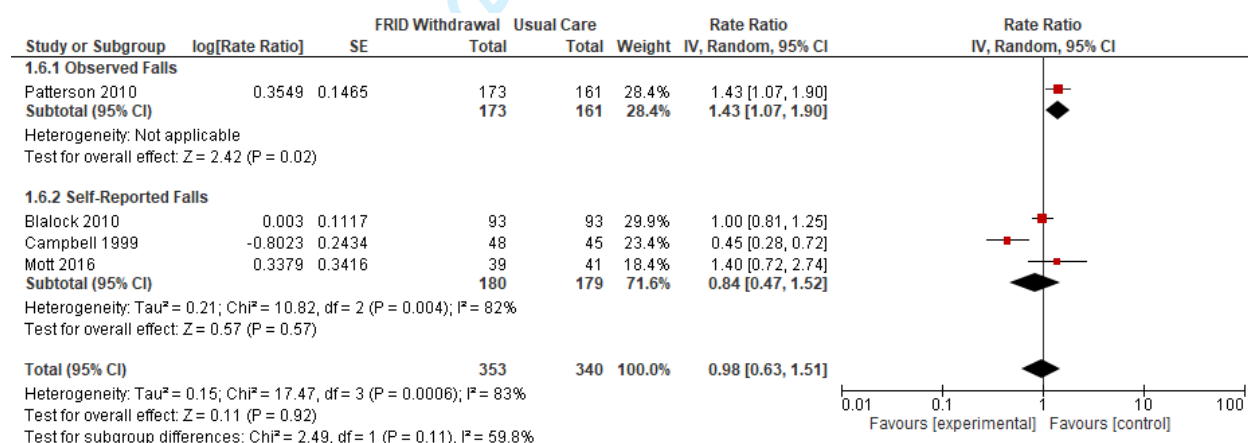

## 2.2 Falls Incidence - Known vs. Unknown Faller



## 2.3 Falls Incidence - Psychotropic Withdrawal vs. Any FRID Withdrawal

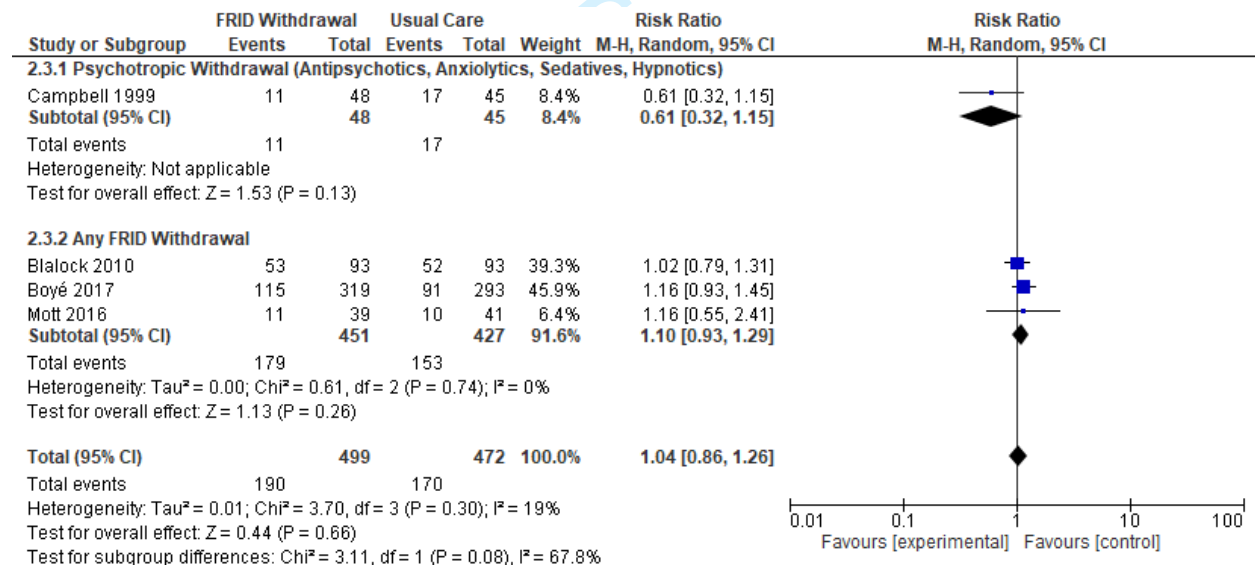

## 2.4 Falls Incidence - Physician vs. Pharmacist Medication Review



**Supplementary Table S1: Subgroup Credibility Assessment – Clinician Medication Review****Physician vs. Pharmacist Medication Review Subgroup for Falls Rate**

| <b>Design</b>                                                                                         | <b>Criteria Met?</b>                                                |
|-------------------------------------------------------------------------------------------------------|---------------------------------------------------------------------|
| Is the subgroup variable a characteristic measured at baseline or after randomization?                | Yes – Variable determined at baseline                               |
| Is the effect suggested by comparisons within rather than between studies?                            | No – Comparison between studies                                     |
| Was the hypothesis specified a priori?                                                                | Yes                                                                 |
| Was the direction of the subgroup effect specified a priori?                                          | No                                                                  |
| Was the subgroup effect one of a small number of hypothesized effects tested?                         | Yes – 1 of 5 analyses                                               |
| <b>Analysis</b>                                                                                       |                                                                     |
| Does the interaction test suggest a low likelihood that chance explains the apparent subgroup effect? | Yes – $p = 0.0004$                                                  |
| Is the significant subgroup effect independent?                                                       | Yes                                                                 |
| <b>Context</b>                                                                                        |                                                                     |
| Is the size of the subgroup effect large?                                                             | Yes – RaR 0.45 vs. 1.20                                             |
| Is the interaction consistent across studies?                                                         | No                                                                  |
| Is the interaction consistent across closely related outcomes within the study?                       | No – Subgroup interaction was not seen for incidence of falls       |
| Is there indirect evidence that supports the hypothesized interaction (biological rationale)?         | No - No compelling external evidence supporting subgroup hypothesis |

**Supplementary Table S2: Subgroup Credibility Assessment – FRID Withdrawal Type****Antipsychotic vs. Any FRID Withdrawal for Falls Incidence**

| <b>Design</b>                                                                                         | <b>Criteria Met?</b>                                                                                                                                                         |
|-------------------------------------------------------------------------------------------------------|------------------------------------------------------------------------------------------------------------------------------------------------------------------------------|
| Is the subgroup variable a characteristic measured at baseline or after randomization?                | Yes – Variable determined at baseline                                                                                                                                        |
| Is the effect suggested by comparisons within rather than between studies?                            | No – Comparison between studies                                                                                                                                              |
| Was the hypothesis specified a priori?                                                                | Yes                                                                                                                                                                          |
| Was the direction of the subgroup effect specified a priori?                                          | No                                                                                                                                                                           |
| Was the subgroup effect one of a small number of hypothesized effects tested?                         | Yes – 1 of 3 analyses                                                                                                                                                        |
| <b>Analysis</b>                                                                                       |                                                                                                                                                                              |
| Does the interaction test suggest a low likelihood that chance explains the apparent subgroup effect? | Yes – $p=0.06$                                                                                                                                                               |
| Is the significant subgroup effect independent?                                                       | No                                                                                                                                                                           |
| <b>Context</b>                                                                                        |                                                                                                                                                                              |
| Is the size of the subgroup effect large?                                                             | Yes – RR 0.61 vs. 1.14                                                                                                                                                       |
| Is the interaction consistent across studies?                                                         | No                                                                                                                                                                           |
| Is the interaction consistent across closely related outcomes within the study?                       | No – Subgroup interaction was not seen for rate of falls                                                                                                                     |
| Is there indirect evidence that supports the hypothesized interaction (biological rationale)?         | Yes – Antipsychotics associated with one of highest risks of falls. The withdrawal of any FRID may involve withdrawal of those with lower risks and limit potential benefit. |



## Supplementary Figure S3: Sensitivity Analyses

### 4.1 Falls Rate - Low vs. High Risk of Bias due to Blinding



### 4.2 Falls Rate - Low vs. High Risk of Bias due to Attritional Bias



### 4.3 Falls Incidence - Low vs. High Risk of Bias due to Blinding



### 4.4 Falls Incidence - Low vs. High Risk of Bias due to Attrition Bias



## 4.5 Falls Rate – Random vs. Effects Model

### Random Effects Model



### Fixed Effects Model



## 4.6 Falls Incidence – Random vs. Fixed Effects Model

### Random Effects Model



### Fixed Effects Model



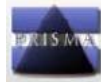

# PRISMA 2009 Checklist

| Section/topic                      | #  | Checklist item                                                                                                                                                                                                                                                                                              | Reported on page #      |
|------------------------------------|----|-------------------------------------------------------------------------------------------------------------------------------------------------------------------------------------------------------------------------------------------------------------------------------------------------------------|-------------------------|
| <b>TITLE</b>                       |    |                                                                                                                                                                                                                                                                                                             |                         |
| Title                              | 1  | Identify the report as a systematic review, meta-analysis, or both.                                                                                                                                                                                                                                         | 1                       |
| <b>ABSTRACT</b>                    |    |                                                                                                                                                                                                                                                                                                             |                         |
| Structured summary                 | 2  | Provide a structured summary including, as applicable: background; objectives; data sources; study eligibility criteria, participants, and interventions; study appraisal and synthesis methods; results; limitations; conclusions and implications of key findings; systematic review registration number. | 2-3                     |
| <b>INTRODUCTION</b>                |    |                                                                                                                                                                                                                                                                                                             |                         |
| Rationale                          | 3  | Describe the rationale for the review in the context of what is already known.                                                                                                                                                                                                                              | 5-6                     |
| Objectives                         | 4  | Provide an explicit statement of questions being addressed with reference to participants, interventions, comparisons, outcomes, and study design (PICOS).                                                                                                                                                  | 6                       |
| <b>METHODS</b>                     |    |                                                                                                                                                                                                                                                                                                             |                         |
| Protocol and registration          | 5  | Indicate if a review protocol exists, if and where it can be accessed (e.g., Web address), and, if available, provide registration information including registration number.                                                                                                                               | 7                       |
| Eligibility criteria               | 6  | Specify study characteristics (e.g., PICOS, length of follow-up) and report characteristics (e.g., years considered, language, publication status) used as criteria for eligibility, giving rationale.                                                                                                      | 7-8                     |
| Information sources                | 7  | Describe all information sources (e.g., databases with dates of coverage, contact with study authors to identify additional studies) in the search and date last searched.                                                                                                                                  | 7                       |
| Search                             | 8  | Present full electronic search strategy for at least one database, including any limits used, such that it could be repeated.                                                                                                                                                                               | Supplementary Figure S1 |
| Study selection                    | 9  | State the process for selecting studies (i.e., screening, eligibility, included in systematic review, and, if applicable, included in the meta-analysis).                                                                                                                                                   | 7                       |
| Data collection process            | 10 | Describe method of data extraction from reports (e.g., piloted forms, independently, in duplicate) and any processes for obtaining and confirming data from investigators.                                                                                                                                  | 8                       |
| Data items                         | 11 | List and define all variables for which data were sought (e.g., PICOS, funding sources) and any assumptions and simplifications made.                                                                                                                                                                       | 8                       |
| Risk of bias in individual studies | 12 | Describe methods used for assessing risk of bias of individual studies (including specification of whether this was done at the study or outcome level), and how this information is to be used in any data synthesis.                                                                                      | 8                       |
| Summary measures                   | 13 | State the principal summary measures (e.g., risk ratio, difference in means).                                                                                                                                                                                                                               | 8                       |
| Synthesis of results               | 14 | Describe the methods of handling data and combining results of studies, if done, including measures of consistency (e.g., $I^2$ ) for each meta-analysis.                                                                                                                                                   | 8-9                     |

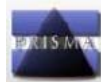

# PRISMA 2009 Checklist

Page 1 of 2

| Section/topic                 | #  | Checklist item                                                                                                                                                                                           | Reported on page # |
|-------------------------------|----|----------------------------------------------------------------------------------------------------------------------------------------------------------------------------------------------------------|--------------------|
| Risk of bias across studies   | 15 | Specify any assessment of risk of bias that may affect the cumulative evidence (e.g., publication bias, selective reporting within studies).                                                             | 9-10               |
| Additional analyses           | 16 | Describe methods of additional analyses (e.g., sensitivity or subgroup analyses, meta-regression), if done, indicating which were pre-specified.                                                         | 9-10               |
| <b>RESULTS</b>                |    |                                                                                                                                                                                                          |                    |
| Study selection               | 17 | Give numbers of studies screened, assessed for eligibility, and included in the review, with reasons for exclusions at each stage, ideally with a flow diagram.                                          | 10<br>Figure 1     |
| Study characteristics         | 18 | For each study, present characteristics for which data were extracted (e.g., study size, PICOS, follow-up period) and provide the citations.                                                             | 10-11<br>Table 1   |
| Risk of bias within studies   | 19 | Present data on risk of bias of each study and, if available, any outcome level assessment (see item 12).                                                                                                | 13-14<br>Figure 3  |
| Results of individual studies | 20 | For all outcomes considered (benefits or harms), present, for each study: (a) simple summary data for each intervention group (b) effect estimates and confidence intervals, ideally with a forest plot. | 12-13,<br>Figure 2 |
| Synthesis of results          | 21 | Present results of each meta-analysis done, including confidence intervals and measures of consistency.                                                                                                  | 12-13<br>Figure 2  |
| Risk of bias across studies   | 22 | Present results of any assessment of risk of bias across studies (see Item 15).                                                                                                                          | 15-16<br>Table 2   |
| Additional analysis           | 23 | Give results of additional analyses, if done (e.g., sensitivity or subgroup analyses, meta-regression [see Item 16]).                                                                                    | 14-15              |
| <b>DISCUSSION</b>             |    |                                                                                                                                                                                                          |                    |
| Summary of evidence           | 24 | Summarize the main findings including the strength of evidence for each main outcome; consider their relevance to key groups (e.g., healthcare providers, users, and policy makers).                     | 17-20              |
| Limitations                   | 25 | Discuss limitations at study and outcome level (e.g., risk of bias), and at review-level (e.g., incomplete retrieval of identified research, reporting bias).                                            | 20-21              |
| Conclusions                   | 26 | Provide a general interpretation of the results in the context of other evidence, and implications for future research.                                                                                  | 21                 |
| <b>FUNDING</b>                |    |                                                                                                                                                                                                          |                    |
| Funding                       | 27 | Describe sources of funding for the systematic review and other support (e.g., supply of data); role of funders for the systematic review.                                                               | 22                 |

From: Moher D, Liberati A, Tetzlaff J, Altman DG, The PRISMA Group (2009). Preferred Reporting Items for Systematic Reviews and Meta-Analyses: The PRISMA Statement. PLoS Med 6(6): e1000097. doi:10.1371/journal.pmed1000097

For peer review only, <http://bmjopen.bmj.com/site/about/guidelines.xhtml>

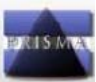

# PRISMA 2009 Checklist

- 1
- 2
- 3
- 4
- 5
- 6
- 7
- 8
- 9
- 10
- 11
- 12
- 13
- 14
- 15
- 16
- 17
- 18
- 19
- 20
- 21
- 22
- 23
- 24
- 25
- 26
- 27
- 28
- 29
- 30
- 31
- 32
- 33
- 34
- 35
- 36
- 37
- 38
- 39
- 40
- 41
- 42
- 43
- 44
- 45
- 46
- 47

For peer review only

# BMJ Open

## Deprescribing Fall-Risk-Increasing Drugs (FRIDs) for the Prevention of Falls and Fall-related Complications: A Systematic Review and Meta-analysis

|                                 |                                                                                                                                                                                                                                                                                                                                                                                                                                                                                                                                                                                                                                                                                                                                                                                                |
|---------------------------------|------------------------------------------------------------------------------------------------------------------------------------------------------------------------------------------------------------------------------------------------------------------------------------------------------------------------------------------------------------------------------------------------------------------------------------------------------------------------------------------------------------------------------------------------------------------------------------------------------------------------------------------------------------------------------------------------------------------------------------------------------------------------------------------------|
| Journal:                        | <i>BMJ Open</i>                                                                                                                                                                                                                                                                                                                                                                                                                                                                                                                                                                                                                                                                                                                                                                                |
| Manuscript ID                   | bmjopen-2019-035978.R2                                                                                                                                                                                                                                                                                                                                                                                                                                                                                                                                                                                                                                                                                                                                                                         |
| Article Type:                   | Original research                                                                                                                                                                                                                                                                                                                                                                                                                                                                                                                                                                                                                                                                                                                                                                              |
| Date Submitted by the Author:   | 09-Oct-2020                                                                                                                                                                                                                                                                                                                                                                                                                                                                                                                                                                                                                                                                                                                                                                                    |
| Complete List of Authors:       | Lee, Justin; McMaster University, Division of Geriatric Medicine, Department of Medicine; McMaster University, Department of Health Research Methods, Evidence and Impact<br>Negm, AM; McMaster University Faculty of Health Sciences, School of Rehabilitation Sciences; Hamilton Health Sciences, Geriatric Education and Research in Aging Sciences Centre<br>Peters, Ryan; McMaster University Faculty of Health Sciences, Michael G. DeGroot School of Medicine<br>Wong, Eric; University of Toronto, Division of Geriatric Medicine, Department of Medicine<br>Holbrook, Anne; McMaster University, Division of Clinical Pharmacology and Toxicology, Department of Medicine; McMaster University Faculty of Health Sciences, Department of Health Research Methods, Evidence and Impact |
| <b>Primary Subject Heading</b>: | Geriatric medicine                                                                                                                                                                                                                                                                                                                                                                                                                                                                                                                                                                                                                                                                                                                                                                             |
| Secondary Subject Heading:      | Pharmacology and therapeutics, General practice / Family practice                                                                                                                                                                                                                                                                                                                                                                                                                                                                                                                                                                                                                                                                                                                              |
| Keywords:                       | INTERNAL MEDICINE, CLINICAL PHARMACOLOGY, GERIATRIC MEDICINE, PRIMARY CARE                                                                                                                                                                                                                                                                                                                                                                                                                                                                                                                                                                                                                                                                                                                     |
|                                 |                                                                                                                                                                                                                                                                                                                                                                                                                                                                                                                                                                                                                                                                                                                                                                                                |

SCHOLARONE™  
Manuscripts





I, the Submitting Author has the right to grant and does grant on behalf of all authors of the Work (as defined in the below author licence), an exclusive licence and/or a non-exclusive licence for contributions from authors who are: i) UK Crown employees; ii) where BMJ has agreed a CC-BY licence shall apply, and/or iii) in accordance with the terms applicable for US Federal Government officers or employees acting as part of their official duties; on a worldwide, perpetual, irrevocable, royalty-free basis to BMJ Publishing Group Ltd ("BMJ") its licensees and where the relevant Journal is co-owned by BMJ to the co-owners of the Journal, to publish the Work in this journal and any other BMJ products and to exploit all rights, as set out in our [licence](#).

The Submitting Author accepts and understands that any supply made under these terms is made by BMJ to the Submitting Author unless you are acting as an employee on behalf of your employer or a postgraduate student of an affiliated institution which is paying any applicable article publishing charge ("APC") for Open Access articles. Where the Submitting Author wishes to make the Work available on an Open Access basis (and intends to pay the relevant APC), the terms of reuse of such Open Access shall be governed by a Creative Commons licence – details of these licences and which [Creative Commons](#) licence will apply to this Work are set out in our licence referred to above.

Other than as permitted in any relevant BMJ Author's Self Archiving Policies, I confirm this Work has not been accepted for publication elsewhere, is not being considered for publication elsewhere and does not duplicate material already published. I confirm all authors consent to publication of this Work and authorise the granting of this licence.

1  
2  
3 **TITLE:** Deprescribing Fall-Risk-Increasing Drugs (FRIDs) for the Prevention of Falls and  
4  
5 Fall-related Complications: A Systematic Review and Meta-analysis  
6  
7  
8  
9

10 **AUTHORS:** Justin Lee, BScPhm, ACPR, MD<sup>1,2,3</sup>

11  
12 Ahmed Negm, MD, MSc, PhD<sup>3,4</sup>

13  
14 Ryan Peters, BSc, MD<sup>5</sup>

15  
16 Eric Wong, BSc, MD<sup>6</sup>

17  
18 Anne Holbrook, MD, PharmD, MSc<sup>2,7</sup>  
19  
20  
21  
22  
23

24 <sup>1</sup>Division of Geriatric Medicine, Department of Medicine, McMaster University, Hamilton,  
25 Ontario, Canada

26 <sup>2</sup>Department of Health Research Methods, Evidence, and Impact, McMaster University,  
27 Hamilton,  
28 Ontario, Canada

29 <sup>3</sup>Geriatric Education and Research in Aging Sciences (GERAS) Centre, Hamilton, Ontario,  
30 Canada

31 <sup>4</sup>School of Rehabilitation Sciences, Faculty of Health Sciences, McMaster University, Hamilton  
32 Ontario, Canada;

33 <sup>5</sup>Michael DeGroote School of Medicine, McMaster University, Hamilton, Ontario, Canada

34 <sup>6</sup>Division of Geriatric Medicine, Department of Medicine, University of Toronto, Toronto,  
35 Ontario, Canada

36 <sup>7</sup>Division of Clinical Pharmacology and Toxicology, Department of Medicine, McMaster  
37 University, Hamilton, Ontario, Canada  
38  
39  
40

41 **CORRESPONDING AUTHOR:** Justin Lee  
42 Geriatric Education and Research in Aging Sciences Centre  
43 88 Maplewood Avenue, Room 158  
44 Hamilton, Ontario, Canada L8M 1W9  
45 Email: [justin.lee@medportal.ca](mailto:justin.lee@medportal.ca)  
46 Telephone: (905) 521-2100  
47  
48

49 **MAIN TEXT WORD COUNT:** 3709 (excluding title page, abstract, references, tables)  
50  
51  
52  
53  
54  
55  
56  
57  
58  
59  
60

**ABSTRACT:**

**Objectives:** Prevention of falls and fall-related injuries is a priority due to the substantial health and financial burden of falls on patients and healthcare systems. Deprescribing medications known as “fall-risk increasing drugs” (FRIDs) is a common strategy to prevent falls. We conducted a systematic review to determine its efficacy for the prevention of falls and fall-related complications.

**Design:** Systematic review and meta-analysis

**Data sources:** MEDLINE, EMBASE, CENTRAL, CINAHL and grey literature from inception to August 1, 2020.

**Eligibility criteria for selecting studies:** Randomized controlled trials of FRID withdrawal compared to usual care evaluating the rate of falls, incidence of falls, fall-related injuries, fall-related fractures, fall-related hospitalizations or adverse effects related to the intervention in adults aged  $\geq 65$  years.

**Data extraction and synthesis:** Two reviewers independently performed citation screening, data abstraction, risk of bias assessment and certainty of evidence grading. Random-effects models were used for meta-analyses.

**Results:** Five trials involving 1305 participants met eligibility criteria. Deprescribing FRIDs did not change the rate of falls (rate ratio [RaR] 0.98, 95% CI 0.63 to 1.51), the incidence of falls (risk difference [RD] 0.01, 95% CI -0.06 to 0.09; relative risk [RR] 1.04, 95% CI 0.86 to 1.26) or rate

1  
2  
3 of fall-related injuries (RaR 0.89, 95% CI 0.57 to 1.39) over a 6 to 12 month follow-up period. No  
4 trials evaluated the impact of deprescribing FRIDs on fall-related fractures or hospitalizations.  
5  
6  
7  
8  
9

10 **Conclusion:** There is a paucity of robust high-quality evidence to support or refute that a FRID  
11 deprescribing strategy alone is effective at preventing falls or falls-related injury in older adults.  
12 Although there may be other reasons to deprescribe FRIDs, our systematic review found that it  
13 may result in little to no difference in the rate or risk of falls as an sole falls reduction strategy.  
14  
15  
16  
17  
18  
19  
20

21 **Registration:** PROSPERO CRD42016040203  
22  
23  
24  
25

26 **Key Words:** Falls, Falls prevention, Fall-risk increasing drug (FRID), Deprescribing, Medication  
27 withdrawal, Seniors, Older Adults, Systematic review  
28  
29  
30  
31  
32

33 **Word Count: 295**  
34  
35  
36  
37  
38  
39  
40  
41  
42  
43  
44  
45  
46  
47  
48  
49  
50  
51  
52  
53  
54  
55  
56  
57  
58  
59  
60

## ARTICLE SUMMARY

### Strengths and Limitations of this Study:

- This study's results are based on a systematic review and meta-analysis of randomised controlled trials
- We employed rigorous analytic methods and interpretational approaches including duplicate assessment, subgroup credibility criteria and optimal information size considerations.
- We assessed the certainty in evidence (i.e. quality of evidence) using the Grading of Recommendations, Assessment, Development and Evaluation (GRADE) Framework.
- Additional studies are needed to reach the optimal information size to reduce uncertainty about this intervention and establish its relative importance in the range of possible fall prevention interventions

## INTRODUCTION

Falls and fall-related injuries are significant public health concerns. Every year, 1 in 3 older adults aged  $\geq 65$  years falls and 10% of these falls cause serious injury or hospitalization.[1] Falls are estimated to annually cost \$50 billion in the United States, \$2 billion in Canada, and £2.3 billion in the United Kingdom.[2–4] All jurisdictional levels are making significant investments to implement falls prevention quality improvement initiatives. These include Public Health England’s National Falls Prevention Coordinating Group (NFPRCG), the Centers for Disease Control and Prevention (CDC) Stopping Elderly Accidents, Deaths, & Injuries (STEADI) Initiative, and Health Canada’s Canadian Patient Safety Institute “Reducing Falls and Injuries from Falls” initiative. National accreditation bodies such as the United States Joint Commission and Accreditation Canada also mandate specific falls prevention activities of healthcare organizations through their required organizational practices and standards.

Since the majority of falls result from multiple factors (e.g. poor strength and balance, visual and cognitive impairment), current practice guidelines and accreditation standards focus on multi-factorial assessment and intervention strategies.[5] These strategies involve the combination of two or more interventions (e.g. exercise, home or environmental modification, vision assessment, education, medication management, vitamin D supplementation). However, the 2018 United States Preventive Services Task Force evidence report recommends that multifactorial interventions only be offered to select patients because the overall net benefit is small.[6] In fact, there is ongoing debate on the relative merits of focusing on single versus multifactorial interventions, and many clinicians and institutions focus on single interventions due to limited resources.[7]

1  
2  
3 As an individual intervention, only exercise has robust evidence demonstrating reductions  
4 in the incidence of fallers and rate of injurious falls.[6,8] It is unclear if other parts of the multi-  
5 component strategy are effective, how large is their individual treatment effect, and which  
6 components should be prioritized when resources are limited.  
7  
8  
9  
10

11  
12 Although there is limited evidence of effectiveness, deprescribing medications known as  
13 “fall-risk increasing drugs” (FRIDs) is common practice and typically included in both  
14 multifactorial and single intervention strategies. The justification is based on observational studies  
15 that suggest certain medications are associated with increased falls risk as well as some  
16 randomized controlled trials (RCTs) that have shown that medication management interventions  
17 (including those with a broader focus of reducing polypharmacy and/or potentially inappropriate  
18 prescribing) may reduce the risk of falls.[9] FRIDs include anti-hypertensives, anti-arrhythmics,  
19 anti-cholinergics, anti-histamines, sedatives-hypnotics, anti-psychotics, anti-depressants, opioids  
20 and NSAIDs.[10–15]. Although the mechanisms are not fully understood, these drugs may  
21 influence falls risk by adversely affecting the cardiovascular or central nervous system (e.g.  
22 orthostatic hypotension, bradycardia, sedation, sleep disturbance, confusion, dizziness).  
23  
24  
25  
26  
27  
28  
29  
30  
31  
32  
33  
34  
35  
36  
37

38 Key issues affecting the quality of this observational evidence and certainty of a causal  
39 relationship include: (1) variable adjustment for confounders, dosage or duration of therapy, (2)  
40 medication use confirmed only at baseline (but not throughout follow-up), and (3) potential  
41 prescribing bias associated with specific medication classes. Most meta-analyses have also been  
42 based on the pooling of unadjusted estimates and thus susceptible to bias including confounding  
43 by indication. As a result, it is unclear whether the observed increase in falls is causally related to  
44 such drug use versus the underlying conditions or patients for which the drugs are treating.  
45  
46  
47  
48  
49  
50  
51  
52  
53  
54  
55  
56  
57  
58  
59  
60

1  
2  
3 With the aim of evaluating its effectiveness as a single falls prevention strategy, we  
4  
5 conducted this systematic review to determine whether deprescribing FRIDs decreases the risk of  
6  
7 falls compared to usual care in older adults aged  $\geq 65$  years. To the best of our knowledge, no  
8  
9 previous systematic review has addressed this specific research question.  
10  
11  
12  
13

## 14 **METHODS**

15  
16 This review was developed using the Cochrane Handbook and reported in accordance with  
17  
18 the Preferred Reporting Items for Systematic Reviews and Meta-Analyses (PRISMA)  
19  
20 guidelines.[16,17] The protocol was registered in PROSPERO (CRD42016040203) and  
21  
22 previously published and described in detail.[18]  
23  
24  
25  
26  
27

### 28 **Search Strategy**

29  
30 MEDLINE, EMBASE, CINAHL and the Cochrane Central Register of Controlled Trials  
31  
32 (CENTRAL) electronic databases were searched from inception to August 1, 2020 using a  
33  
34 combination of Medical Subject Headings, controlled and free-text terms synonymous for the  
35  
36 intervention. The MEDLINE search strategy is shown in Supplementary Figure S1. This strategy  
37  
38 was modified for use in other databases.  
39  
40  
41

42 Reference lists of relevant studies, reviews and guidelines were reviewed to identify  
43  
44 additional studies. Trial registries and geriatric medicine conference abstracts were also reviewed.  
45  
46  
47  
48

### 49 **Study Eligibility Criteria**

50  
51 After pilot testing the eligibility criteria, pairs of reviewers independently conducted  
52  
53 screening. A third reviewer resolved disagreements.  
54  
55  
56  
57  
58  
59  
60



1  
2  
3 Studies were included if they were RCTs evaluating FRID deprescribing or withdrawal  
4 with the intent of reducing falls. FRID deprescribing was defined as the planned and supervised  
5 discontinuation or dose reduction of single or multiple medications thought to independently  
6 increase falls risk.[10–12]  
7  
8  
9  
10

11  
12 The comparator could be usual care (i.e. no change in usual activities and/or no FRID  
13 withdrawal) or a control intervention not thought to reduce falls. Studies focused on adults aged  
14  $\geq 65$  years from all settings were included. Studies involving FRID withdrawal within multi-  
15 component interventions were excluded if the effect of FRID withdrawal could not be isolated.  
16  
17  
18  
19

20  
21 The primary outcomes of this review were the (1) rate of falls (defined as the total number  
22 of falls per unit of person time that falls were monitored) and (2) incidence of falls (i.e. number of  
23 fallers). Secondary outcomes included the incidence of (1) fall-related fractures, (2) fall-related  
24 injuries, (3) fall-related hospitalization, (4) adverse effects related to the withdrawal intervention  
25 (e.g. disease relapse, symptomatic withdrawal).  
26  
27  
28  
29  
30  
31  
32  
33  
34

### 35 **Data Extraction and Quality Assessment**

36  
37 Two reviewers independently abstracted data on study characteristics, participants,  
38 interventions, comparisons, and outcomes using standardized electronic data extraction forms.  
39  
40  
41 Disagreements were resolved through consensus.  
42  
43  
44

45 Two reviewed independently conducted risk of bias (RoB) assessments using the Cochrane  
46 Risk of Bias tool.[19] A previously published modification to the RoB assessment was employed  
47 to estimate unclearly reported study methods and allow for sensitivity analysis.[20] This  
48 modification involved a structured approach where a score of “definitely low risk”, “probably low  
49 risk”, “probably high risk”, or “definitely high risk” was assigned to each RoB criterion.  
50  
51  
52  
53  
54  
55  
56  
57  
58  
59  
60

1  
2  
3 “Definitely” and “probably” scores were collapsed for both low and high RoB scores.  
4  
5 Disagreements were resolved through consensus.  
6  
7  
8  
9

## 10 **Data Synthesis and Analysis**

11  
12 The rate of falls was reported as a rate ratio (RaR) with a 95% confidence interval (CI).  
13  
14 Dichotomous outcomes (i.e. incidences of falls, fall-related fracture, fall-related injury, fall-related  
15 hospitalization and adverse effects related to the withdrawal intervention) have been reported as  
16 risk ratios (RR) with 95% CIs.  
17  
18  
19  
20

21 We used RevMan 5.3 and the intention-to-treat principle for all statistical analyses. We  
22 conducted meta-analyses using the generic inverse variance method to allow pooling of effect  
23 estimates. A random effects model was used given expected between-trial variations in  
24 methodological, participant and medication characteristics between studies. We had originally  
25 planned to pool data at various pre-specified time intervals, but all included studies had follow-up  
26 between 6 to 12 months.  
27  
28  
29  
30  
31  
32  
33  
34

35 We assessed heterogeneity through visual inspection of forest plots and statistical tests. A  
36 two-tailed test with p-value <0.10 was considered significant for all Chi-square analyses as per  
37 recommendations from the Cochrane Handbook and the  $I^2$  was interpreted using the Cochrane  
38 Collaboration thresholds.[16]  
39  
40  
41  
42  
43

44 Heterogeneity was explored in subgroup analyses based on five a priori hypotheses  
45 (Supplementary Table S1).[18] These included differences in baseline propensity for falls as  
46 influenced by (1) a history of recurrent falls (e.g. known faller or not) or (2) place of residence or  
47 care (e.g. community, long-term care); differences in the intervention as influenced by (3) specific  
48 medication class(es) chosen for withdrawal and (4) preceding medication review by a clinician for  
49  
50  
51  
52  
53  
54  
55  
56  
57  
58  
59  
60

1  
2  
3 FRID withdrawal appropriateness; as well as differences in methodology based on (5) definitions  
4 used for “falls” (e.g., observed vs. self-reported). We assessed the credibility of any apparent  
5 subgroup effects using eleven previously published criteria recommended by the Cochrane  
6 Handbook.[21]  
7  
8  
9  
10  
11

12 A priori sensitivity analyses were conducted to explore the impact of low vs. high RoB  
13 based on blinding and attrition. Studies did not report per-protocol results that would allow for our  
14 planned intention-to-treat vs. per-protocol sensitivity analysis. The impact of using a fixed vs.  
15 random effects model was explored in a post hoc sensitivity analysis.  
16  
17  
18  
19  
20

21 The confidence in effect estimates for each reported outcome was assessed using the  
22 Grading of Recommendations, Assessment, Development and Evaluation (GRADE) approach.[22]  
23  
24  
25  
26  
27

## 28 **Patient and Public Involvement**

29 Patients and the public were not involved in this review.  
30  
31  
32  
33  
34

## 35 **RESULTS**

36 Of 891 citations identified, 31 were relevant for full text review and 6 met eligibility criteria  
37 ( $\kappa=0.79$ , 95% CI 0.51-1.00, substantial agreement). One study was available as an abstract, but it  
38 did not report its falls data.[23] Data were requested from the authors, but we did not receive a  
39 response. The PRISMA flow diagram summarizing our search results is shown in Figure 1.  
40  
41  
42  
43  
44  
45  
46  
47  
48

## 49 **Study Characteristics**

50 The included trials in our review are described in Table 1.  
51  
52  
53  
54  
55  
56  
57  
58  
59  
60

**Table 1: Characteristics of Included Studies**

| Author, Year        | Study Design | Population                                                                                                                                                                                                                                                              | Sample Size                                                                                          | Age Mean (SD) | Targeted FRIDs                                                                                                                                                                                                                             | Intervention                                                                                                                                                                                                                                                        | Control                                                                                                                                                                          | Study Outcomes                            |
|---------------------|--------------|-------------------------------------------------------------------------------------------------------------------------------------------------------------------------------------------------------------------------------------------------------------------------|------------------------------------------------------------------------------------------------------|---------------|--------------------------------------------------------------------------------------------------------------------------------------------------------------------------------------------------------------------------------------------|---------------------------------------------------------------------------------------------------------------------------------------------------------------------------------------------------------------------------------------------------------------------|----------------------------------------------------------------------------------------------------------------------------------------------------------------------------------|-------------------------------------------|
| Blalock 2010 [24]   | RCT          | 1) Community setting<br>2) Age $\geq$ 65<br>3) Speak, read English<br>4) $\geq$ 4 prescription medications<br>5) $\geq$ 1 high falls-risk medication<br>6) $\geq$ 1 fall not attributable to syncope within previous year                                               | 186<br>(93 I/93 C)                                                                                   | 74.8 (6.9)    | Benzodiazepines, antidepressants, anticonvulsants, sedative hypnotics, opioid analgesics, antipsychotics, and skeletal muscle relaxants                                                                                                    | 1) Pharmacist medication review<br>2) Physician coordinated medication changes<br>3) Fall brochure, home safety checklist                                                                                                                                           | 1) Fall brochure, home safety checklist                                                                                                                                          | 1) Rate of falls<br>2) Incidence of falls |
| Campbell 1999 [25]  | RCT          | 1) Community setting<br>2) Age $\geq$ 65<br>3) Using benzodiazepine, other hypnotic, anti-depressant or major tranquilizer<br>4) Ambulatory<br>5) No physiotherapy<br>6) General practitioner thought psychotropic medication withdrawal beneficial                     | 93<br><br>Arm 1:<br>24 (I)<br><br>Arm 2:<br>24 (I)<br><br>Arm 3:<br>21 (C)*<br><br>Arm 4:<br>24 (C)* | 74.7 (7.2)    | Psychotropic medications (e.g. benzodiazepines, hypnotics, antidepressants, tranquilizers)                                                                                                                                                 | <u>Arm 1</u><br>1) Withdrawal of psychotropic medication over 14 weeks<br>2) Placebo substitution<br>3) Home exercise programme<br><br><u>Arm 2</u><br>1) Psychotropic medication withdrawal<br>2) Placebo substitution<br>3) No home exercise programme            | <u>Arm 3</u><br>1) No change in psychotropic medication<br>2) Home exercise programme<br><br><u>Arm 4</u><br>1) No change in psychotropic medication<br>2) No exercise programme | 1) Rate of falls<br>2) Incidence of falls |
| Mott 2016 [26]      | Cluster RCT  | 1) Community setting<br>2) Age $\geq$ 65<br>3) English-speaking<br>4) Fall in last 12 months/fear of falling<br>5) Workshop participation<br>6) Capable of consent                                                                                                      | 80<br>(39 I/41 C)                                                                                    | 75.6 (6.5)    | Neuroleptics, benzodiazepines, anti-depressants, sedative-hypnotics, anti-hypertensives, cyclobenzaprine, carisoprodol, sedating antihistamines, oxybutynin, carbamazepine, methocarbamol, prochlorperazine, benzotropine, trihexiphenidyl | 1) FRID pharmacist review<br>2) Medication-related action plan (MAP) developed by pharmacist for patient<br>3) Pharmacist follow-up<br>4) Patient given pamphlet describing the role of medications in falls and monthly falls calendars<br>5) Pharmacist follow-up | 1) Medications in falls pamphlet                                                                                                                                                 | 1) Rate of falls<br>2) Incidence of falls |
| Patterson 2010 [27] | Cluster RCT  | 1) Nursing home setting with $\geq$ 30 beds; not exclusive care of terminally ill<br>2) Age $\geq$ 65                                                                                                                                                                   | 334<br>(173 I/161 C)                                                                                 | 82.7 (8.4)    | Psychoactive medications (i.e. hypnotics, anxiolytics, antipsychotics)                                                                                                                                                                     | 1) Monthly medication review via pharmacist for appropriateness<br>2) Nurse and prescriber collaboration to improve medications                                                                                                                                     | 1) Usual care                                                                                                                                                                    | 1) Rate of falls                          |
| Boyé 2017 [28]      | RCT          | 1) Acute care emergency department setting; attended due to fall incident<br>2) Age $\geq$ 65<br>3) $\geq$ 1 FRID for $\geq$ 2 weeks prior to the fall<br>4) MMSE $\geq$ 21/30<br>5) Ambulates independently<br>6) Community dwelling<br>7) Informed consent by patient | 612<br>(319 I/293 C)                                                                                 | 80.2 (7.3)    | Anxiolytics/hypnotics, antidepressants, neuroleptics, anti-hypertensives, anti-arrhythmics, NSAIDs, H2 receptor antagonists, opioids, sympathomimetics, antihistaminics, diuretics                                                         | 1) Investigator conducted FRID assessment, proposed changes<br>2) Changes discussed with geriatrician and general practitioner/prescribing doctor<br>3) If consensus, FRID discontinued, reduced dosage, substituted for potentially safer option                   | 1) Usual care                                                                                                                                                                    | 1) Rate of falls<br>2) Incidence of falls |

Abbreviations: FRID = Fall-risk-increasing drug, I = Intervention, C = Control

\* Arm 3 and Arm 4 classified as controls due to lack of FRID withdrawal in these arms of the factorial design

1  
2  
3 Three studies were individually randomized, while two studies were cluster randomized by either  
4 nursing home or health centre. Studies ranged in size from 80 to 612 participants. With exception  
5  
6 of one study[26], studies were multi-centre involving 144 sites and 4 countries. All were conducted  
7  
8 in the community setting except for one conducted in long-term care.[27] Follow-up periods  
9  
10 ranged from 6 to 12 months.  
11  
12  
13

14 Overall, there were 1305 participants across all trials. Most were female (>70%) and had a  
15 falls history (78.9%). Several key confounders were not reported in the studies including: (1)  
16  
17 baseline number and types of FRIDs, (2) baseline number of medications, and (3) baseline number  
18  
19 and types of co-morbidities. All these factors are thought to potentially modify falls risk.[29,30]  
20  
21  
22

23 All interventions included a preceding assessment for FRID deprescribing appropriateness.  
24  
25 This was conducted by physicians in 2 trials and pharmacists in 3 trials. Three trials tried to  
26  
27 withdraw any FRID, while others focused on sedative-hypnotics, antipsychotics, or  
28  
29 antidepressants. Successful discontinuation and adherence to deprescribing protocols were low in  
30  
31 all studies. Rates of complete discontinuation of at least one FRID ranged from 10 to 40%.  
32  
33  
34

35 In terms of our study outcomes, 4 trials measured the rate of falls and 4 measured falls  
36  
37 incidence. One trial reported fall-related injuries.[24] Fall-related fractures, fall-related  
38  
39 hospitalization or deprescribing-related adverse effects were not measured by any of the trials.  
40  
41  
42  
43

## 44 **Summary of Findings**

### 45 **Rate and Incidence of Falls**

46  
47  
48  
49 Four studies reported the effect of deprescribing FRIDs on the rate of falls. Deprescribing  
50  
51 FRIDs did not reduce the rate of falling (RaR 0.98, 95% CI 0.63 to 1.51; Figure 2 – Analysis 1.1).  
52  
53  
54  
55  
56  
57  
58  
59  
60

1  
2  
3 Considerable statistical heterogeneity was present ( $\chi^2=17.47$ ,  $p=0.0006$ ,  $I^2=83\%$ ) and subsequently  
4 explored in subgroup analysis.  
5  
6

7  
8 Four studies reported the effect of deprescribing FRIDs on the risk of falls as measured by  
9 falls incidence. Deprescribing FRIDs did not reduce the incidence of falls (RR 1.04, 95% CI 0.86  
10 to 1.26,  $I^2 = 19\%$ ,  $\chi^2=3.70$ ,  $p = 0.30$ ; Figure 2 – Analysis 2.1). In absolute terms, there was a non-  
11 significant risk difference increase of 0.01 (95% CI -0.06 to 0.09,  $I^2 = 22\%$ ,  $p=0.76$ ; Figure 2 –  
12 Analysis 2.2)  
13  
14  
15  
16  
17  
18

### 19 20 21 ***Rate of Injurious Falls*** 22

23  
24 One trial reported the effect of deprescribing FRIDs on fall-related injuries.[24]  
25 Deprescribing FRIDs did not reduce the rate of fall-related injuries (RaR 0.89, 95% CI 0.57 to  
26 1.39; Figure 2 – Analysis 3.1). This trial did not report data that would allow for any of our pre-  
27 planned subgroup analyses.  
28  
29  
30  
31  
32

### 33 34 35 **Risk of Bias Assessment** 36

37  
38 Figure 3 summarizes our RoB assessments. All studies were deemed at high risk of bias in  
39 at least one domain. The overall mean weighted kappa across all assessments was 0.67 (moderate  
40 agreement). For individual RoB assessments, kappa ranged from 0 to 0.85. Inter-rater agreement  
41 is actually higher than indicated by the calculated scores due to the “kappa co-efficient  
42 paradox”. [31,32] Low kappas (e.g.  $\kappa=0$ ) occurred despite high levels of observed agreement (e.g.  
43  $\geq 80\%$  agreement) for two RoB assessments. True agreement is falsely attributed to chance  
44 agreement by the kappa calculation when there is substantial imbalance in marginal ratings.  
45  
46  
47  
48  
49  
50  
51  
52  
53  
54  
55  
56  
57  
58  
59  
60

1  
2  
3 For falls rate and incidence, all studies except one[25] were judged at high risk of bias for  
4 lack of blinding of participants, personnel and outcome assessors. It is unclear whether blinding  
5 could have impacted behaviour or perceptions (e.g. activity risk-level, placebo effect). Risk of  
6 ascertainment bias was high in one study[27] (i.e. no standardized falls definition was used), but  
7 all other studies used methods accepted to be low risk of bias (i.e. falls recorded daily on postcards  
8 or calendars). Risk of attrition bias was deemed high in three studies based on high or unbalanced  
9 lost to follow-up rates.[24,25,28]  
10  
11  
12  
13  
14  
15  
16  
17  
18  
19  
20  
21

### 22 ***Publication Bias***

23  
24 Since less than 10 eligible studies were found, a funnel plot was not constructed due to an  
25 inability to make meaningful conclusions about publication bias.  
26  
27  
28  
29  
30

### 31 ***Subgroup Analyses and Exploration of Heterogeneity***

32  
33 Our pre-specified subgroup analyses did not adequately explain the statistical  
34 heterogeneity observed results for the rate and incidence of falls (Supplementary Figure S2).  
35 Deprescribing FRIDs appeared more effective when a preceding medication review was conducted  
36 by physicians compared to pharmacists ( $p=0.0004$ ,  $I^2=91.9\%$ , Analysis 1.5), while psychotropic  
37 withdrawal appeared more effective than strategies withdrawing any FRID ( $p=0.08$ ,  $I^2=67.8\%$ ,  
38 Analysis 2.3). However, in both analyses, only 6 of 11 subgroup credibility criteria were met and  
39 each subgroup was limited to one trial with less than 100 participants (Supplementary Table S2).  
40 We, therefore, judged the credibility that these subgroup effects are real as poor and uncertain.  
41  
42  
43  
44  
45  
46  
47  
48  
49  
50  
51  
52  
53  
54  
55  
56  
57  
58  
59  
60

1  
2  
3 The available data did not permit subgroup analyses by place of residence or falls  
4 ascertainment method. The other subgroup analyses showed no evidence of difference beyond that  
5 due to chance.  
6  
7  
8  
9

## 10 11 12 **Sensitivity Analyses** 13

14  
15 Our sensitivity analyses are shown in Supplementary Figure S3. The incorporation of trials  
16 with high risk of performance bias appeared to mask the potential benefit of deprescribing FRIDs  
17 on reducing the incidence and rate of falls, while the trials with high risk of attrition bias appeared  
18 to mask a potential increase in falls rate with deprescribing FRIDs. These results should be  
19 interpreted cautiously and definitive conclusions cannot be made. Data from trials with low risk  
20 of performance bias were limited to one trial with less than 100 participants, and data from trials  
21 with low risk of attrition bias were limited to two trials with less than 450 participants overall.  
22  
23  
24  
25  
26  
27  
28  
29

30  
31 A post-hoc sensitivity analysis examining the impact of using a fixed vs. random effects  
32 model did not change conclusions regarding the effect of deprescribing FRIDs on the rate or  
33 incidence of falls.  
34  
35  
36  
37  
38  
39

## 40 **Quality of Evidence** 41

42 The GRADE evidence profile is shown in Table 2.  
43  
44  
45  
46  
47  
48  
49  
50  
51  
52  
53  
54  
55  
56  
57  
58  
59  
60



**Table 2: GRADE Quality of Evidence Assessment**

| Certainty assessment  |                   |                      |                      |              |                      |                      | № of patients               |                    | Effect                                   |                                                        | Certainty        | Importance |
|-----------------------|-------------------|----------------------|----------------------|--------------|----------------------|----------------------|-----------------------------|--------------------|------------------------------------------|--------------------------------------------------------|------------------|------------|
| № of studies          | Study design      | Risk of bias         | Inconsistency        | Indirectness | Imprecision          | Other considerations | FRID deprescribing strategy | usual care         | Relative (95% CI)                        | Absolute (95% CI)                                      |                  |            |
| Falls Rate            |                   |                      |                      |              |                      |                      |                             |                    |                                          |                                                        |                  |            |
| 4                     | randomised trials | serious <sup>a</sup> | serious <sup>b</sup> | not serious  | serious <sup>c</sup> | none                 | 353                         | 340                | <b>Rate ratio 0.98</b><br>(0.63 to 1.51) | -                                                      | ⊕○○○<br>VERY LOW | IMPORTANT  |
| Falls Incidence       |                   |                      |                      |              |                      |                      |                             |                    |                                          |                                                        |                  |            |
| 4                     | randomised trials | serious <sup>a</sup> | serious <sup>d</sup> | not serious  | serious <sup>c</sup> | none                 | 190/499<br>(38.1%)          | 170/472<br>(36.0%) | <b>RR 1.04</b><br>(0.86 to 1.26)         | <b>14 more per 1,000</b><br>(from 50 fewer to 94 more) | ⊕○○○<br>VERY LOW | IMPORTANT  |
|                       |                   |                      |                      |              |                      |                      |                             | 33.7%              |                                          |                                                        |                  |            |
| Fall-Related Injuries |                   |                      |                      |              |                      |                      |                             |                    |                                          |                                                        |                  |            |
| 1                     | randomised trials | serious <sup>a</sup> | not serious          | not serious  | serious <sup>c</sup> | none                 | 93                          | 93                 | <b>Rate ratio 0.89</b><br>(0.57 to 1.39) | -                                                      | ⊕⊕○○<br>LOW      | CRITICAL   |

1  
2  
3 We judged the quality of evidence to be low or very low for all outcomes (falls rates, falls incidence  
4 and fall-related injuries) after rating down for risk of bias, inconsistency and imprecision.  
5  
6

7  
8 We believe the optimal information size (OIS) to make definitive conclusions on the effect  
9  
10 of deprescribing FRIDs has not yet been met as the body of evidence is based on fewer than 2000  
11 participants and less than 400 events.[33,34] This is based on the OIS calculation figure  
12 recommended by the GRADE guidelines using a well-established control falls event rate of 30%  
13 described in the literature and conservative relative risk reduction (RRR) of 20% (assuming  $\alpha =$   
14 0.05 and  $\beta = 0.2$ ).[34,35]  
15  
16  
17  
18  
19  
20  
21  
22  
23

## 24 **DISCUSSION**

25  
26 This systematic review sought to determine whether deprescribing FRIDs decreased the  
27 risk of falls in older adults and found that there is a lack of robust high-quality evidence to support  
28 or refute the deprescribing of FRIDs alone as an effective fall prevention strategy. Incorporating  
29 data from 5 RCTs involving 1305 participants aged  $\geq 65$  years, our meta-analyses indicate that a  
30 FRID deprescribing strategy did not significantly change the rate of falls (RaR 0.98, 95% CI 0.63  
31 to 1.51) nor the risk of falling (RD 0.01, 95% CI -0.06 to 0.09) over a 6 to 12-month follow-up  
32 period. Although this intervention focuses on those medications thought to be associated with falls,  
33 the uncertainty of its effect on falls and conclusions of current lack of evidence of effectiveness  
34 are similar to previous systematic reviews evaluating the effectiveness of medication reviews that  
35 had a broader focus on reducing polypharmacy and potentially inappropriate prescribing (i.e. not  
36 focused solely on FRIDs).[9,36]  
37  
38  
39  
40  
41  
42  
43  
44  
45  
46  
47  
48  
49  
50

51 There is also a significant absence of evidence for clinically- and patient-important  
52 outcomes such as fall-related injuries, fractures and hospitalizations. The only trial to date that  
53  
54  
55  
56  
57  
58  
59  
60

1  
2  
3 evaluated the rate of fall-related injuries did not demonstrate a statistically significant effect (RaR  
4 0.89, 95% CI 0.57-1.39).[24] Our search found no trials measuring the impact on fall-related  
5 fractures, fall-related hospitalizations or adverse effects related to a FRID deprescribing strategy.  
6  
7 Although this may be rooted in the difficulty of conducting RCTs powered for such outcomes,  
8 their measurement and reporting are still important to inform systematic review meta-analyses that  
9  
10 could lead to more precise estimates.  
11  
12  
13  
14  
15

16  
17 Based on low-quality evidence, it is unclear whether deprescribing FRIDs as a single  
18 intervention leads to any appreciable clinically important benefit or harm. Our current best effect  
19 estimates for falls rate and incidence are centred around no appreciable difference (i.e. RaR  $\approx$  1,  
20 RR  $\approx$  1, RD  $\approx$  0). Although seemingly logical to assume, reducing isolated risk factors may not  
21 necessarily lead to a reduction in falls and fall-related complications. The absence of change in the  
22 incidence of hip fractures after statewide regulatory action on benzodiazepine prescribing in the  
23 United States that reduced benzodiazepine use by 60.3% is a real-world example of this  
24 phenomenon and the complexity of exposure-outcome relationships.[37]  
25  
26  
27  
28  
29  
30  
31  
32  
33  
34

35 Our findings likely reflect the multi-factorial nature of falls and the varying risk of different  
36 FRIDs. It is unclear as to what degree a particular risk factor or combination of risk factors (e.g.  
37 specific FRIDs) must be reduced to produce an appreciable change in falls. Medications may only  
38 have conditional or contributory causality to falls. It may be that medication-related interventions  
39 work best in combination with other interventions or only in specific contexts.  
40  
41  
42  
43  
44  
45  
46

47 Only one trial[25] included in our review demonstrated a statistically significant benefit  
48 with deprescribing FRIDs. This was also the only trial to use study capsules to operationalize  
49 blinded deprescribing of FRIDs in participants, research personnel and outcome assessors. Its  
50 results might be more reflective of the true potential physiological effect of deprescribing FRIDs  
51  
52  
53  
54  
55  
56  
57  
58  
59  
60

1  
2  
3 because it minimized the risk of performance bias. However, the magnitude of benefit achievable  
4  
5 in the non-research setting at this time may be closer to those seen in the unblinded trials due to  
6  
7 the strong psychological and behavioural factors (e.g. placebo effect) that may hinder successful  
8  
9 deprescribing. Further advances in implementation science and behavioural change strategies are  
10  
11 likely needed to facilitate medication optimization.  
12  
13

14  
15 These results raise several questions about the presumed effectiveness of deprescribing  
16  
17 FRIDs as an isolated falls prevention strategy. Given the amount of resources being invested into  
18  
19 falls prevention initiatives around the world, clinicians and organizations should examine: (1) what  
20  
21 is the strength of evidence supporting their current activities, (2) whether these activities are cost-  
22  
23 effective, and (3) whether resources are being appropriately prioritized to those interventions  
24  
25 shown to provide the most value. This should also be applied to what is being required of  
26  
27 healthcare organizations in national accreditation standards (e.g. Joint Commission, Accreditation  
28  
29 Canada) to help direct and encourage optimal use of limited healthcare resources.  
30  
31

32  
33 Clinicians and policy-makers need to consider the current lack of strong evidence for  
34  
35 deprescribing FRIDs as an isolated intervention for the specific purpose of reducing falls,  
36  
37 particularly in patients who may be very reluctant or who have strong indications for specific  
38  
39 FRIDs. FRID reduction is one out of many possible interventions that need to be considered. As  
40  
41 with prescribing medications, deprescribing is a skill and comes with the potential for harm as well  
42  
43 as benefit.[38] Thoughtful consideration of the goals, appropriateness and safety of deprescribing  
44  
45 is important.[39] Our results highlight the need for a comprehensive and individualized approach  
46  
47 to falls. Multi-component interventions are ideal, but interventions may need to be prioritized  
48  
49 depending on time, resources and context.  
50  
51  
52  
53  
54  
55  
56  
57  
58  
59  
60

1  
2  
3 Despite insufficient evidence to support or refute the deprescribing of FRIDs for falls  
4 prevention, our results do not mean that clinicians should avoid deprescribing FRIDs. There may  
5 be many other reasons to deprescribe these medications. These include avoidance of adverse drug  
6 events, improvements in cognition, increased medication adherence and drug costs savings. It is  
7 also unclear whether medication review and management with a broader focus on reducing  
8 polypharmacy and potentially inappropriate prescribing in older adults may be beneficial in  
9 preventing falls. Some RCTs with such interventions have shown a reduction of falls risk, while  
10 others have not demonstrated a significant difference.[40–46]  
11  
12  
13  
14  
15  
16  
17  
18  
19  
20

21 Our review highlights the need for future FRID deprescribing trials that evaluate patient-  
22 important outcomes (e.g. injuries, fractures and hospitalizations). Greater attention to optimal  
23 design and reporting is needed to minimize risk of bias and enhance our interpretation of the results.  
24 Examples include improved reporting of confounding baseline characteristics and intervention  
25 fidelity (e.g. number and types of FRIDs, degree and duration of dose reduction). Deprescribing  
26 is challenging and extra measures are likely needed to improve successful intervention adherence  
27 and follow-up.  
28  
29  
30  
31  
32  
33  
34  
35  
36  
37  
38  
39

## 40 **STRENGTHS AND LIMITATIONS**

41  
42 Our review has limitations. There was variation in the operationalization of FRID  
43 deprescribing and degree of success achieved (e.g. dose reduction only, completion  
44 discontinuation, non-adherence). This presumably makes the detection of any potential benefit less  
45 likely and our conclusions more conservative. However, the effect estimates are likely more  
46 indicative of what might be expected outside of the research setting. These phenomena likely  
47 represent the real-life challenges of deprescribing (especially with certain types of FRIDs such as  
48  
49  
50  
51  
52  
53  
54  
55  
56  
57  
58  
59  
60

1  
2  
3 psychotropics or opioids). Moreover, our ability to assess for confounders modifying falls risk was  
4  
5 limited due to inconsistent reporting of relevant baseline characteristics and lack of patient-level  
6  
7 data. Lastly, our ability to make definitive conclusions is limited because the total sample size  
8  
9 across studies for each outcome did not yet meet our calculated estimate for the required optimal  
10  
11 information size.  
12  
13

14  
15 Our review has several strengths. First, our search was comprehensive and we included a  
16  
17 rigorous grey literature search for unpublished studies. Second, we employed optimal analytical  
18  
19 and interpretational approaches including duplicate assessment, subgroup credibility criteria and  
20  
21 optimal information size considerations. Third, unlike previous medication-focused reviews, we  
22  
23 applied the GRADE approach to assess the quality of evidence and our degree of confidence in  
24  
25 the results.  
26  
27  
28  
29

## 30 31 **CONCLUSIONS**

32  
33 Our systematic review found that deprescribing FRIDs as an isolated strategy results in  
34  
35 little to no difference in the rate and risk of falls or falls-related injuries, but the evidence is still  
36  
37 sparse and very low quality. Additional well-designed studies are needed to reach the optimal  
38  
39 information size to reduce uncertainty about this intervention and establish its relative importance  
40  
41 in the range of possible interventions that can be employed by clinicians and health systems to  
42  
43 reduce falls.  
44  
45  
46  
47  
48

## 49 **Acknowledgements:**

50  
51 The authors would like to thank Lois Cottrell, medical librarian at St. Joseph's Healthcare  
52  
53 Hamilton, Charlton Campus, Hamilton, Ontario, Canada and Andrea McLellan, Head of  
54  
55  
56  
57  
58  
59

1  
2  
3 Collection and Technical Services, School of Medicine liaison, at McMaster University, Hamilton,  
4  
5 Ontario, Canada, for their assistance with the development of the search strategy.  
6  
7  
8  
9

#### 10 **Author Contributions:**

11  
12 JL conceptualized the study. JL and AH designed and developed the protocol. RP and EW assisted  
13  
14 with citation review. RP and AN assisted with data extraction, risk of bias assessment and certainty  
15  
16 of evidence grading. All authors contributed to the analysis and interpretation of results. JL drafted  
17  
18 the initial manuscript and all authors contributed to its revision and final approval.  
19  
20  
21  
22  
23

#### 24 **Funding:**

25  
26 This research received no specific grant from any funding agency in the public, commercial or  
27  
28 not-for-profit sectors.  
29  
30  
31  
32

#### 33 **Competing Interests:**

34  
35 The authors have no potential conflicts of interest to declare.  
36  
37  
38  
39

#### 40 **Patient Consent for Publication:**

41  
42 None required.  
43  
44  
45  
46

#### 47 **Data Sharing Statement:**

48  
49 No unpublished data are available.  
50  
51  
52  
53  
54  
55  
56  
57  
58  
59  
60

**REFERENCES:**

- 1 Hill KD, Wee R. Psychotropic drug-induced falls in older people: a review of interventions aimed at reducing the problem. *Drugs Aging* 2012;**29**:15–30. doi:10.2165/11598420-000000000-00000
- 2 Florence CS, Bergen G, Atherly A, *et al.* Medical Costs of Fatal and Nonfatal Falls in Older Adults. *J Am Geriatr Soc* 2018;**66**:693–8. doi:10.1111/jgs.15304
- 3 National Institute for Health and Care Excellence. Falls in older people: assessing risk and prevention. 2013.
- 4 Public Health Agency of Canada. Seniors' Falls in Canada. 2014.
- 5 Summary of the Updated American Geriatrics Society/British Geriatrics Society clinical practice guideline for prevention of falls in older persons. *J Am Geriatr Soc* 2011;**59**:148–57. doi:10.1111/j.1532-5415.2010.03234.x
- 6 Guirguis-Blake JM, Michael YL, Perdue LA, *et al.* Interventions to Prevent Falls in Older Adults. *JAMA* 2018;**319**:1705. doi:10.1001/jama.2017.21962
- 7 Campbell AJ, Robertson MC. Fall Prevention: Single or Multiple Interventions? Single Interventions for Fall Prevention. *J Am Geriatr Soc* 2013;**61**:281–4. doi:10.1111/jgs.12095\_2
- 8 Tricco AC, Thomas SM, Veroniki AA, *et al.* Comparisons of Interventions for Preventing Falls in Older Adults. *JAMA* 2017;**318**:1687. doi:10.1001/jama.2017.15006
- 9 Gillespie LD, Robertson MC, Gillespie WJ, *et al.* Interventions for preventing falls in older people living in the community. *Cochrane database Syst Rev* 2012;**9**:CD007146. doi:10.1002/14651858.CD007146.pub3
- 10 Leipzig RM, Cumming RG, Tinetti ME. Drugs and falls in older people: a systematic



- 1  
2  
3 review and meta-analysis: I. Psychotropic drugs. *J Am Geriatr Soc* 1999;**47**:30–9.  
4  
5  
6 11 Leipzig RM, Cumming RG, Tinetti ME. Drugs and falls in older people: a systematic  
7  
8 review and meta-analysis: II. Cardiac and analgesic drugs. *J Am Geriatr Soc* 1999;**47**:40–  
9  
10 50.  
11  
12 12 Woolcott JC, Richardson KJ, Wiens MO, *et al*. Meta-analysis of the impact of 9  
13  
14 medication classes on falls in elderly persons. *Arch Intern Med* 2009;**169**:1952–60.  
15  
16 doi:10.1001/archinternmed.2009.357  
17  
18  
19 13 de Vries M, Seppala LJ, Daams JG, *et al*. Fall-Risk-Increasing Drugs: A Systematic  
20  
21 Review and Meta-Analysis: I. Cardiovascular Drugs. *J Am Med Dir Assoc*  
22  
23 2018;**19**:371.e1-371.e9. doi:10.1016/j.jamda.2017.12.013  
24  
25  
26 14 Seppala LJ, Wermelink AMAT, de Vries M, *et al*. Fall-Risk-Increasing Drugs: A  
27  
28 Systematic Review and Meta-Analysis: II. Psychotropics. *J Am Med Dir Assoc*  
29  
30 2018;**19**:371.e11-371.e17. doi:10.1016/j.jamda.2017.12.098  
31  
32  
33 15 Seppala LJ, van de Glind EMM, Daams JG, *et al*. Fall-Risk-Increasing Drugs: A  
34  
35 Systematic Review and Meta-analysis: III. Others. *J Am Med Dir Assoc* 2018;**19**:372.e1-  
36  
37 372.e8. doi:10.1016/j.jamda.2017.12.099  
38  
39  
40 16 The Cochrane Collaboration. *Cochrane Handbook for Systematic Reviews of Interventions*  
41  
42 *Version 5.1.0 [updated March 2011]*. 2011.  
43  
44  
45 17 Moher D, Liberati A, Tetzlaff J, *et al*. Preferred reporting items for systematic reviews and  
46  
47 meta-analyses: the PRISMA statement. *Ann Intern Med* 2009;**151**:264–9, W64.  
48  
49  
50 18 Lee JY, Holbrook A. The efficacy of fall-risk-increasing drug (FRID) withdrawal for the  
51  
52 prevention of falls and fall-related complications: protocol for a systematic review and  
53  
54 meta-analysis. *Syst Rev* 2017;**6**:33.  
55  
56  
57  
58  
59  
60

- 1  
2  
3 19 Higgins JPT, Altman DG, Gøtzsche PC, *et al.* The Cochrane Collaboration's tool for  
4 assessing risk of bias in randomised trials. *BMJ* 2011;**343**:d5928.  
5  
6  
7  
8 20 Akl EA, Sun X, Busse JW, *et al.* Specific instructions for estimating unclearly reported  
9 blinding status in randomized trials were reliable and valid. *J Clin Epidemiol*  
10 2012;**65**:262–7. doi:10.1016/j.jclinepi.2011.04.015  
11  
12  
13  
14  
15 21 Sun X, Briel M, Walter SD, *et al.* Is a subgroup effect believable? Updating criteria to  
16 evaluate the credibility of subgroup analyses. *BMJ* 2010;**340**:c117.  
17  
18  
19 22 Guyatt G, Oxman AD, Akl EA, *et al.* GRADE guidelines: 1. Introduction-GRADE  
20 evidence profiles and summary of findings tables. *J Clin Epidemiol* 2011;**64**:383–94.  
21  
22  
23 23 Streim JE, Filippo S, Have T, *et al.* Antidepressant discontinuation associated with  
24 cognitive decline in older adult residents of long-term care facilities. *Am J Geriatr*  
25 *psychiatry* 2012;**20**:S147–8. doi:10.1097/01.JGP.0000413064.91948.aa  
26  
27  
28  
29  
30 24 Blalock SJ, Casteel C, Roth MT, *et al.* Impact of enhanced pharmacologic care on the  
31 prevention of falls: a randomized controlled trial. *Am J Geriatr Pharmacother*  
32 2010;**8**:428–40. doi:10.1016/j.amjopharm.2010.09.002  
33  
34  
35  
36  
37 25 Campbell AJ, Robertson MC, Gardner MM, *et al.* Psychotropic medication withdrawal  
38 and a home-based exercise program to prevent falls: a randomized, controlled trial. *J Am*  
39 *Geriatr Soc* 1999;**47**:850–3.  
40  
41  
42  
43  
44 26 Mott DA, Martin B, Breslow R, *et al.* Impact of a medication therapy management  
45 intervention targeting medications associated with falling: Results of a pilot study. *J Am*  
46 *Pharm Assoc (2003)* 2016;**56**:22–8.  
47  
48  
49  
50  
51 27 Patterson SM, Hughes CM, Crealey G, *et al.* An evaluation of an adapted U.S. model of  
52 pharmaceutical care to improve psychoactive prescribing for nursing home residents in  
53  
54  
55  
56  
57  
58  
59  
60

- 1  
2  
3 northern ireland (fleetwood northern ireland study). *J Am Geriatr Soc* 2010;**58**:44–53.  
4  
5 doi:10.1111/j.1532-5415.2009.02617.x  
6  
7  
8 28 Boyé NDA, van der Velde N, de Vries OJ, *et al*. Effectiveness of medication withdrawal  
9  
10 in older fallers: results from the Improving Medication Prescribing to reduce Risk Of  
11  
12 FALLs (IMPROveFALL) trial. *Age Ageing* 2017;**46**:142–6. doi:10.1093/ageing/afw161  
13  
14  
15 29 Tinetti M, Kumar C. The Patient Who Falls. *JAMA J Am Med Assoc* 2010;**303**:273–4.  
16  
17 doi:10.1001/jama.2009.2024  
18  
19  
20 30 Chen Y, Zhu L-L, Zhou Q. Effects of drug pharmacokinetic/pharmacodynamic properties,  
21  
22 characteristics of medication use, and relevant pharmacological interventions on fall risk  
23  
24 in elderly patients. *Ther Clin Risk Manag* 2014;**10**:437–48. doi:10.2147/TCRM.S63756  
25  
26  
27 31 Feinstein AR, Cicchetti D V. High agreement but low kappa: I. The problems of two  
28  
29 paradoxes. *J Clin Epidemiol* 1990;**43**:543–9.  
30  
31  
32 32 Tang W, Hu J, Zhang H, *et al*. Kappa coefficient: a popular measure of rater agreement.  
33  
34 *Shanghai Arch psychiatry* 2015;**27**:62–7. doi:10.11919/j.issn.1002-0829.215010  
35  
36  
37 33 Ioannidis J, Lau J. Evolution of treatment effects over time: empirical insight from  
38  
39 recursive cumulative metaanalyses. *Proc Natl Acad Sci US A* 2001;**98**:831–6.  
40  
41 doi:10.1073/pnas.021529998  
42  
43  
44 34 Guyatt GH, Oxman AD, Kunz R, *et al*. GRADE guidelines 6. Rating the quality of  
45  
46 evidence--imprecision. *J Clin Epidemiol* 2011;**64**:1283–93.  
47  
48 doi:10.1016/j.jclinepi.2011.01.012  
49  
50  
51 35 O’Loughlin JL, Robitaille Y, Boivin JF, *et al*. Incidence of and risk factors for falls and  
52  
53 injurious falls among the community-dwelling elderly. *Am J Epidemiol* 1993;**137**:342–54.  
54  
55  
56  
57  
58  
59  
36 Guirguis-Blake JM, Michael YL, Perdue LA, *et al*. *Interventions to Prevent Falls in*

- 1  
2  
3 *Community-Dwelling Older Adults: A Systematic Review for the U.S. Preventive Services*  
4 *Task Force*. Agency for Healthcare Research and Quality (US) 2018.  
5  
6  
7  
8 37 Wagner AK, Ross-Degnan D, Gurwitz JH, *et al*. Effect of New York State regulatory  
9  
10 action on benzodiazepine prescribing and hip fracture rates. *Ann Intern Med* 2007;**146**:96–  
11  
12 103.  
13  
14  
15 38 Reeve E, Moriarty F, Nahas R, *et al*. A narrative review of the safety concerns of  
16  
17 deprescribing in older adults and strategies to mitigate potential harms. *Expert Opin Drug*  
18  
19 *Saf* 2018;**17**:39–49. doi:10.1080/14740338.2018.1397625  
20  
21  
22 39 Lee JY, Farrell B, Holbrook AM. De-prescribing benzodiazepine receptor agonists taken  
23  
24 for insomnia: a review and key messages from practice guidelines. *Polish Arch Intern*  
25  
26 *Med* 2018;**129**:839–45. doi:10.20452/pamw.4391  
27  
28  
29 40 Pit SW, Byles JE, Henry DA, *et al*. A Quality Use of Medicines program for general  
30  
31 practitioners and older people: a cluster randomised controlled trial. *Med J Aust*  
32  
33 2007;**187**:23–30.  
34  
35  
36 41 Weber V, White A, McIlvried R. An electronic medical record (EMR)-based intervention  
37  
38 to reduce polypharmacy and falls in an ambulatory rural elderly population. *J Gen Intern*  
39  
40 *Med* 2008;**23**:399–404.  
41  
42  
43 42 Zermansky AG, Alldred DP, Petty DR, *et al*. Clinical medication review by a pharmacist  
44  
45 of elderly people living in care homes--randomised controlled trial. *Age Ageing*  
46  
47 2006;**35**:586–91. doi:10.1093/ageing/afl075  
48  
49  
50 43 Frankenthal D, Lerman Y, Kalendaryev E, *et al*. Intervention with the screening tool of  
51  
52 older persons potentially inappropriate prescriptions/screening tool to alert doctors to right  
53  
54 treatment criteria in elderly residents of a chronic geriatric facility: a randomized clinical  
55  
56  
57  
58  
59  
60

- 1  
2  
3 trial. *J Am Geriatr Soc* 2014;**62**:1658–65. doi:10.1111/jgs.12993  
4  
5  
6 44 Michalek C, Wehling M, Schlitzer J, *et al*. Effects of ‘Fit fOR The Aged’ (FORTA) on  
7  
8 pharmacotherapy and clinical endpoints--a pilot randomized controlled study. *Eur J Clin*  
9  
10 *Pharmacol* 2014;**70**:1261–7.  
11  
12 45 Meredith S, Feldman P, Frey D, *et al*. Improving medication use in newly admitted home  
13  
14 healthcare patients: A randomized controlled trial. *J Am Geriatr Soc* 2002;**50**:1484–91.  
15  
16 doi:10.1046/j.1532-5415.2002.50402.x  
17  
18  
19 46 Sjoberg C, Wallerstedt SM. Effects of medication reviews performed by a physician on  
20  
21 treatment with fracture-preventing and fall-risk-increasing drugs in older adults with hip  
22  
23 fracture-a randomized controlled study. *J Am Geriatr Soc* 2013;**61**:1464–72.  
24  
25  
26  
27  
28  
29  
30  
31  
32  
33  
34  
35  
36  
37  
38  
39  
40  
41  
42  
43  
44  
45  
46  
47  
48  
49  
50  
51  
52  
53  
54  
55  
56  
57  
58  
59  
60

1  
2  
3 **FIGURES**  
4

5 **Figure 1:** PRISMA Flow Diagram of Study Selection Process  
6

7 **Figure 2:** Forest Plots of FRID Withdrawal versus Usual Care  
8

9 **Figure 3:** Risk of Bias Assessments  
10  
11  
12  
13  
14  
15  
16  
17  
18  
19  
20  
21  
22  
23  
24  
25  
26  
27  
28  
29  
30  
31  
32  
33  
34  
35  
36  
37  
38  
39  
40  
41  
42  
43  
44  
45  
46  
47  
48  
49  
50  
51  
52  
53  
54  
55  
56  
57  
58  
59  
60



### 1.1 Falls Rate

1  
2  
3  
4  
5  
6  
7  
8  
9  
10  
11  
12

| Study or Subgroup     | FRID Withdrawal |        | Usual Care |            | Weight        | Rate Ratio         |                     | Year |
|-----------------------|-----------------|--------|------------|------------|---------------|--------------------|---------------------|------|
|                       | log[Rate Ratio] | SE     | Total      | Total      |               | IV, Random, 95% CI | Year                |      |
| Campbell 1999         | -0.8023         | 0.2434 | 48         | 45         | 23.4%         | 0.45               | [0.28, 0.72]        | 1999 |
| Patterson 2010        | 0.3549          | 0.1465 | 173        | 161        | 28.4%         | 1.43               | [1.07, 1.90]        | 2010 |
| Blalock 2010          | 0.003           | 0.1117 | 93         | 93         | 29.9%         | 1.00               | [0.81, 1.25]        | 2010 |
| Mott 2016             | 0.3379          | 0.3416 | 39         | 41         | 18.4%         | 1.40               | [0.72, 2.74]        | 2016 |
| <b>Total (95% CI)</b> |                 |        | <b>353</b> | <b>340</b> | <b>100.0%</b> | <b>0.98</b>        | <b>[0.63, 1.51]</b> |      |

Heterogeneity: Tau<sup>2</sup> = 0.15; Chi<sup>2</sup> = 17.47, df = 3 (P = 0.0006); I<sup>2</sup> = 83%  
Test for overall effect: Z = 0.11 (P = 0.92)

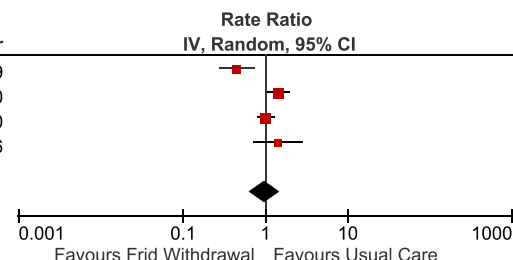

### 2.1 Falls Incidence – Risk Ratio

13  
14  
15  
16  
17  
18  
19  
20  
21  
22  
23  
24

| Study or Subgroup     | FRID Withdrawal |            | Usual Care |            | Weight        | Risk Ratio          |                     |
|-----------------------|-----------------|------------|------------|------------|---------------|---------------------|---------------------|
|                       | Events          | Total      | Events     | Total      |               | M-H, Random, 95% CI | M-H, Random, 95% CI |
| Campbell 1999         | 11              | 48         | 17         | 45         | 8.4%          | 0.61                | [0.32, 1.15]        |
| Blalock 2010          | 53              | 93         | 52         | 93         | 39.3%         | 1.02                | [0.79, 1.31]        |
| Mott 2016             | 11              | 39         | 10         | 41         | 6.4%          | 1.16                | [0.55, 2.41]        |
| Boyé 2017             | 115             | 319        | 91         | 293        | 45.9%         | 1.16                | [0.93, 1.45]        |
| <b>Total (95% CI)</b> |                 | <b>499</b> |            | <b>472</b> | <b>100.0%</b> | <b>1.04</b>         | <b>[0.86, 1.26]</b> |

Total events: FRID Withdrawal = 190, Usual Care = 170  
Heterogeneity: Tau<sup>2</sup> = 0.01; Chi<sup>2</sup> = 3.70, df = 3 (P = 0.30); I<sup>2</sup> = 19%  
Test for overall effect: Z = 0.44 (P = 0.66)

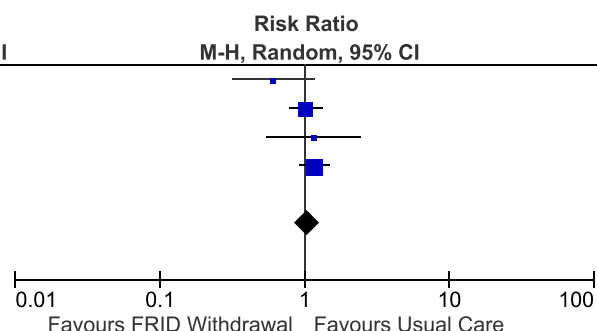

### 2.2 Falls Incidence – Risk Difference

25  
26  
27  
28  
29  
30  
31  
32  
33  
34  
35  
36  
37  
38

| Study or Subgroup     | FRID Withdrawal |            | Usual Care |            | Weight        | Risk Difference     |                      |
|-----------------------|-----------------|------------|------------|------------|---------------|---------------------|----------------------|
|                       | Events          | Total      | Events     | Total      |               | M-H, Random, 95% CI | M-H, Random, 95% CI  |
| Campbell 1999         | 11              | 48         | 17         | 45         | 14.2%         | -0.15               | [-0.33, 0.04]        |
| Blalock 2010          | 53              | 93         | 52         | 93         | 21.8%         | 0.01                | [-0.13, 0.15]        |
| Mott 2016             | 11              | 39         | 10         | 41         | 13.2%         | 0.04                | [-0.15, 0.23]        |
| Boyé 2017             | 115             | 319        | 91         | 293        | 50.9%         | 0.05                | [-0.02, 0.12]        |
| <b>Total (95% CI)</b> |                 | <b>499</b> |            | <b>472</b> | <b>100.0%</b> | <b>0.01</b>         | <b>[-0.06, 0.09]</b> |

Total events: FRID Withdrawal = 190, Usual Care = 170  
Heterogeneity: Tau<sup>2</sup> = 0.00; Chi<sup>2</sup> = 3.86, df = 3 (P = 0.28); I<sup>2</sup> = 22%  
Test for overall effect: Z = 0.31 (P = 0.76)



### 3.1 Fall-Related Injuries

40  
41  
42  
43  
44  
45  
46  
47  
48

| Study or Subgroup     | FRID Withdrawal |        | Usual Care |           | Weight        | Rate Ratio         |                     |      |
|-----------------------|-----------------|--------|------------|-----------|---------------|--------------------|---------------------|------|
|                       | log[Rate Ratio] | SE     | Total      | Total     |               | IV, Random, 95% CI | Year                |      |
| Blalock 2010          | -0.1165         | 0.2273 | 93         | 93        | 100.0%        | 0.89               | [0.57, 1.39]        | 2010 |
| <b>Total (95% CI)</b> |                 |        | <b>93</b>  | <b>93</b> | <b>100.0%</b> | <b>0.89</b>        | <b>[0.57, 1.39]</b> |      |

Heterogeneity: Not applicable  
Test for overall effect: Z = 0.51 (P = 0.61)



49  
50  
51  
52





|                   | Random sequence generation (selection bias) | Allocation concealment (selection bias) | Blinding of participants and personnel (performance bias) | Blinding of outcome assessment (detection bias) | Incomplete outcome data (attrition bias) | Selective reporting (reporting bias) | Other bias |
|-------------------|---------------------------------------------|-----------------------------------------|-----------------------------------------------------------|-------------------------------------------------|------------------------------------------|--------------------------------------|------------|
| 38 Blalock 2010   | +                                           | +                                       | -                                                         | -                                               | -                                        | +                                    | +          |
| 39 Boyé 2017      | +                                           | +                                       | -                                                         | -                                               | -                                        | +                                    | +          |
| 40 Campbell 1999  | +                                           | +                                       | +                                                         | +                                               | -                                        | +                                    | +          |
| 41 Mott 2016      | -                                           | -                                       | -                                                         | -                                               | +                                        | +                                    | +          |
| 42 Patterson 2010 | +                                           | +                                       | -                                                         | -                                               | +                                        | +                                    | +          |

## Supplementary Figure S1: OVID Medline Search Strategy

Database(s): OVID Medline Epub Ahead of Print, In-Process & Other Non-Indexed Citations, Ovid MEDLINE(R) Daily and Ovid MEDLINE(R) 1946 to Present  
Search Strategy:

| #  | Searches                                                                                                                                                                                                                                                                                                                                                                                                                                                                                                                 |
|----|--------------------------------------------------------------------------------------------------------------------------------------------------------------------------------------------------------------------------------------------------------------------------------------------------------------------------------------------------------------------------------------------------------------------------------------------------------------------------------------------------------------------------|
| 1  | exp Accidental Falls/pc [Prevention & Control]                                                                                                                                                                                                                                                                                                                                                                                                                                                                           |
| 2  | fall.mp. [mp=title, abstract, original title, name of substance word, subject heading word, floating sub-heading word, keyword heading word, protocol supplementary concept word, rare disease supplementary concept word, unique identifier, synonyms]                                                                                                                                                                                                                                                                  |
| 3  | falls.mp. [mp=title, abstract, original title, name of substance word, subject heading word, floating sub-heading word, keyword heading word, protocol supplementary concept word, rare disease supplementary concept word, unique identifier, synonyms]                                                                                                                                                                                                                                                                 |
| 4  | exp Deprescriptions/                                                                                                                                                                                                                                                                                                                                                                                                                                                                                                     |
| 5  | ((medicat* or drug*) adj3 (deprescrib* or withdraw* or cessat* or stop* or discontin*))mp. [mp=title, abstract, original title, name of substance word, subject heading word, floating sub-heading word, keyword heading word, protocol supplementary concept word, rare disease supplementary concept word, unique identifier, synonyms]                                                                                                                                                                                |
| 6  | ((antihypertensive* or diuretic* or beta-blocker* or sedative* or hypnotic* or neuroleptic* or antipsychotic* or antidepressant* or benzodiazepine* or narcotic* or opioid* or narcotic* or NSAID*) adj3 (deprescrib* or withdraw* or cessat* or stop* or discontin*))mp. [mp=title, abstract, original title, name of substance word, subject heading word, floating sub-heading word, keyword heading word, protocol supplementary concept word, rare disease supplementary concept word, unique identifier, synonyms] |
| 7  | fall-risk increasing drugs.mp.                                                                                                                                                                                                                                                                                                                                                                                                                                                                                           |
| 8  | FRID.mp.                                                                                                                                                                                                                                                                                                                                                                                                                                                                                                                 |
| 9  | ((medicat* or drug*) adj3 (review* or improv* or program*))mp. [mp=title, abstract, original title, name of substance word, subject heading word, floating sub-heading word, keyword heading word, protocol supplementary concept word, rare disease supplementary concept word, unique identifier, synonyms]                                                                                                                                                                                                            |
| 10 | exp "Drug-Related Side Effects and Adverse Reactions"/pc [Prevention & Control]                                                                                                                                                                                                                                                                                                                                                                                                                                          |
| 11 | exp Medication Therapy Management/ or exp "Drug Utilization Review"/                                                                                                                                                                                                                                                                                                                                                                                                                                                     |
| 12 | 4 or 5 or 6 or 7 or 8 or 9 or 10 or 11                                                                                                                                                                                                                                                                                                                                                                                                                                                                                   |
| 13 | 1 or 2 or 3                                                                                                                                                                                                                                                                                                                                                                                                                                                                                                              |
| 14 | 12 and 13                                                                                                                                                                                                                                                                                                                                                                                                                                                                                                                |
| 15 | remove duplicates from 14                                                                                                                                                                                                                                                                                                                                                                                                                                                                                                |
| 16 | exp Clinical Trial/                                                                                                                                                                                                                                                                                                                                                                                                                                                                                                      |
| 17 | (randomized or randomised).ab,ti.                                                                                                                                                                                                                                                                                                                                                                                                                                                                                        |
| 18 | placebo.ab,ti.                                                                                                                                                                                                                                                                                                                                                                                                                                                                                                           |
| 19 | randomly.ab,ti.                                                                                                                                                                                                                                                                                                                                                                                                                                                                                                          |
| 20 | groups.ab,ti.                                                                                                                                                                                                                                                                                                                                                                                                                                                                                                            |
| 21 | randomized controlled trial.pt.                                                                                                                                                                                                                                                                                                                                                                                                                                                                                          |
| 22 | controlled clinical trial.pt.                                                                                                                                                                                                                                                                                                                                                                                                                                                                                            |
| 23 | 16 or 17 or 18 or 19 or 20 or 21 or 22                                                                                                                                                                                                                                                                                                                                                                                                                                                                                   |
| 24 | 15 and 23                                                                                                                                                                                                                                                                                                                                                                                                                                                                                                                |

## Supplementary Figure S2: Subgroup Analyses

### 1.2 Falls Rate - Known vs. Unknown Faller



### 1.3 Falls Rate - Community vs. Institutionalized



### 1.4 Falls Rate - Psychotropic Withdrawal vs. Any FRID Withdrawal



### 1.5 Falls Rate - Physician vs. Pharmacist Medication Review



### 1.6 Falls Rate - Observed vs. Self-Reported Falls



## 2.2 Falls Incidence - Known vs. Unknown Faller



## 2.3 Falls Incidence - Psychotropic Withdrawal vs. Any FRID Withdrawal



## 2.4 Falls Incidence - Physician vs. Pharmacist Medication Review



**Supplementary Table S1: Subgroup Credibility Assessment – Clinician Medication Review****Physician vs. Pharmacist Medication Review Subgroup for Falls Rate**

| <b>Design</b>                                                                                         | <b>Criteria Met?</b>                                                |
|-------------------------------------------------------------------------------------------------------|---------------------------------------------------------------------|
| Is the subgroup variable a characteristic measured at baseline or after randomization?                | Yes – Variable determined at baseline                               |
| Is the effect suggested by comparisons within rather than between studies?                            | No – Comparison between studies                                     |
| Was the hypothesis specified a priori?                                                                | Yes                                                                 |
| Was the direction of the subgroup effect specified a priori?                                          | No                                                                  |
| Was the subgroup effect one of a small number of hypothesized effects tested?                         | Yes – 1 of 5 analyses                                               |
| <b>Analysis</b>                                                                                       |                                                                     |
| Does the interaction test suggest a low likelihood that chance explains the apparent subgroup effect? | Yes – $p = 0.0004$                                                  |
| Is the significant subgroup effect independent?                                                       | Yes                                                                 |
| <b>Context</b>                                                                                        |                                                                     |
| Is the size of the subgroup effect large?                                                             | Yes – RaR 0.45 vs. 1.20                                             |
| Is the interaction consistent across studies?                                                         | No                                                                  |
| Is the interaction consistent across closely related outcomes within the study?                       | No – Subgroup interaction was not seen for incidence of falls       |
| Is there indirect evidence that supports the hypothesized interaction (biological rationale)?         | No - No compelling external evidence supporting subgroup hypothesis |

**Supplementary Table S2: Subgroup Credibility Assessment – FRID Withdrawal Type****Antipsychotic vs. Any FRID Withdrawal for Falls Incidence**

| <b>Design</b>                                                                                         | <b>Criteria Met?</b>                                                                                                                                                         |
|-------------------------------------------------------------------------------------------------------|------------------------------------------------------------------------------------------------------------------------------------------------------------------------------|
| Is the subgroup variable a characteristic measured at baseline or after randomization?                | Yes – Variable determined at baseline                                                                                                                                        |
| Is the effect suggested by comparisons within rather than between studies?                            | No – Comparison between studies                                                                                                                                              |
| Was the hypothesis specified a priori?                                                                | Yes                                                                                                                                                                          |
| Was the direction of the subgroup effect specified a priori?                                          | No                                                                                                                                                                           |
| Was the subgroup effect one of a small number of hypothesized effects tested?                         | Yes – 1 of 3 analyses                                                                                                                                                        |
| <b>Analysis</b>                                                                                       |                                                                                                                                                                              |
| Does the interaction test suggest a low likelihood that chance explains the apparent subgroup effect? | Yes – $p=0.06$                                                                                                                                                               |
| Is the significant subgroup effect independent?                                                       | No                                                                                                                                                                           |
| <b>Context</b>                                                                                        |                                                                                                                                                                              |
| Is the size of the subgroup effect large?                                                             | Yes – RR 0.61 vs. 1.14                                                                                                                                                       |
| Is the interaction consistent across studies?                                                         | No                                                                                                                                                                           |
| Is the interaction consistent across closely related outcomes within the study?                       | No – Subgroup interaction was not seen for rate of falls                                                                                                                     |
| Is there indirect evidence that supports the hypothesized interaction (biological rationale)?         | Yes – Antipsychotics associated with one of highest risks of falls. The withdrawal of any FRID may involve withdrawal of those with lower risks and limit potential benefit. |



## Supplementary Figure S3: Sensitivity Analyses

### 4.1 Falls Rate - Low vs. High Risk of Bias due to Blinding

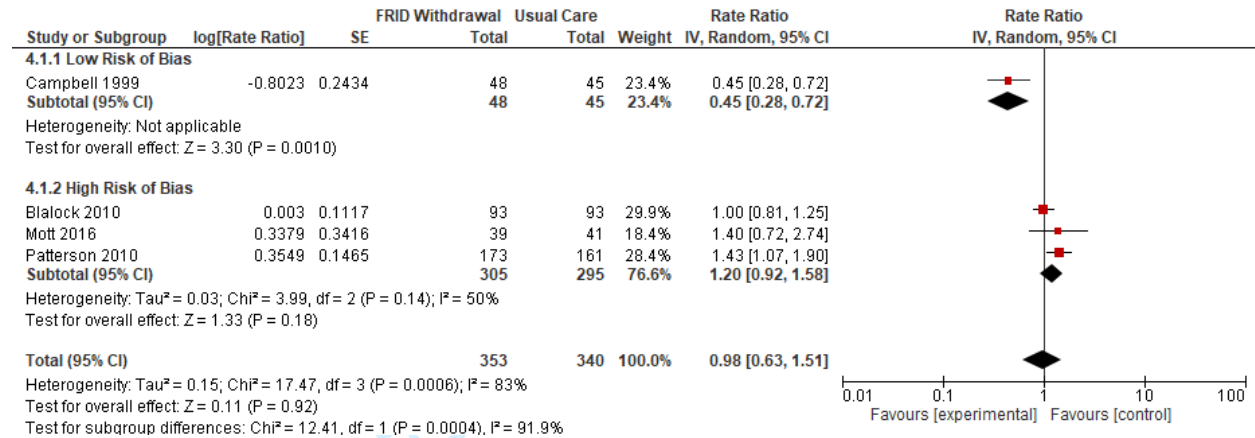

### 4.2 Falls Rate - Low vs. High Risk of Bias due to Attritional Bias

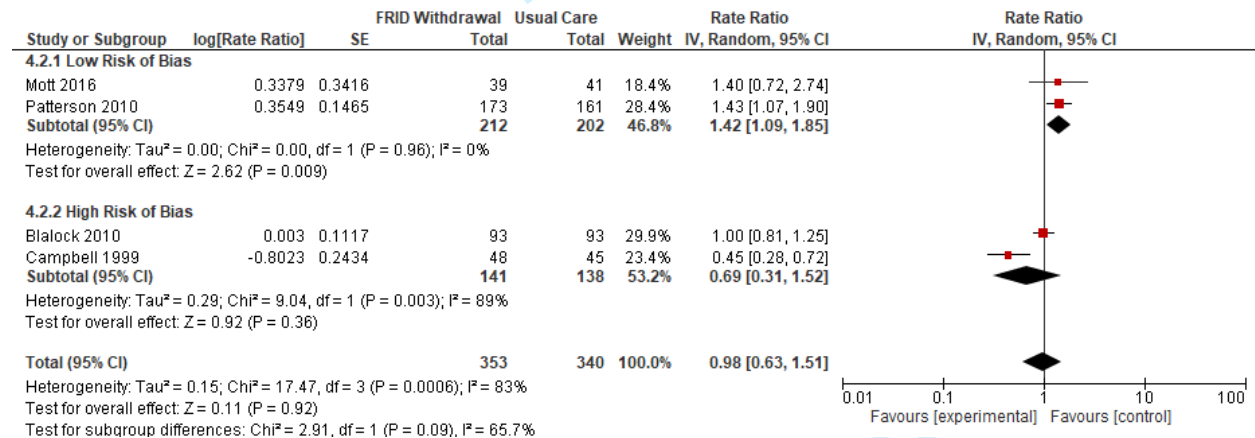

### 4.3 Falls Incidence - Low vs. High Risk of Bias due to Blinding



### 4.4 Falls Incidence - Low vs. High Risk of Bias due to Attrition Bias



## 4.5 Falls Rate – Random vs. Effects Model

### Random Effects Model



### Fixed Effects Model



## 4.6 Falls Incidence – Random vs. Fixed Effects Model

### Random Effects Model



### Fixed Effects Model



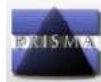

# PRISMA 2009 Checklist

| Section/topic                      | #  | Checklist item                                                                                                                                                                                                                                                                                              | Reported on page #      |
|------------------------------------|----|-------------------------------------------------------------------------------------------------------------------------------------------------------------------------------------------------------------------------------------------------------------------------------------------------------------|-------------------------|
| <b>TITLE</b>                       |    |                                                                                                                                                                                                                                                                                                             |                         |
| Title                              | 1  | Identify the report as a systematic review, meta-analysis, or both.                                                                                                                                                                                                                                         | 1                       |
| <b>ABSTRACT</b>                    |    |                                                                                                                                                                                                                                                                                                             |                         |
| Structured summary                 | 2  | Provide a structured summary including, as applicable: background; objectives; data sources; study eligibility criteria, participants, and interventions; study appraisal and synthesis methods; results; limitations; conclusions and implications of key findings; systematic review registration number. | 2-3                     |
| <b>INTRODUCTION</b>                |    |                                                                                                                                                                                                                                                                                                             |                         |
| Rationale                          | 3  | Describe the rationale for the review in the context of what is already known.                                                                                                                                                                                                                              | 5-6                     |
| Objectives                         | 4  | Provide an explicit statement of questions being addressed with reference to participants, interventions, comparisons, outcomes, and study design (PICOS).                                                                                                                                                  | 7                       |
| <b>METHODS</b>                     |    |                                                                                                                                                                                                                                                                                                             |                         |
| Protocol and registration          | 5  | Indicate if a review protocol exists, if and where it can be accessed (e.g., Web address), and, if available, provide registration information including registration number.                                                                                                                               | 7                       |
| Eligibility criteria               | 6  | Specify study characteristics (e.g., PICOS, length of follow-up) and report characteristics (e.g., years considered, language, publication status) used as criteria for eligibility, giving rationale.                                                                                                      | 7-8                     |
| Information sources                | 7  | Describe all information sources (e.g., databases with dates of coverage, contact with study authors to identify additional studies) in the search and date last searched.                                                                                                                                  | 7                       |
| Search                             | 8  | Present full electronic search strategy for at least one database, including any limits used, such that it could be repeated.                                                                                                                                                                               | Supplementary Figure S1 |
| Study selection                    | 9  | State the process for selecting studies (i.e., screening, eligibility, included in systematic review, and, if applicable, included in the meta-analysis).                                                                                                                                                   | 7-8                     |
| Data collection process            | 10 | Describe method of data extraction from reports (e.g., piloted forms, independently, in duplicate) and any processes for obtaining and confirming data from investigators.                                                                                                                                  | 8-9                     |
| Data items                         | 11 | List and define all variables for which data were sought (e.g., PICOS, funding sources) and any assumptions and simplifications made.                                                                                                                                                                       | 8                       |
| Risk of bias in individual studies | 12 | Describe methods used for assessing risk of bias of individual studies (including specification of whether this was done at the study or outcome level), and how this information is to be used in any data synthesis.                                                                                      | 8-9                     |
| Summary measures                   | 13 | State the principal summary measures (e.g., risk ratio, difference in means).                                                                                                                                                                                                                               | 9                       |
| Synthesis of results               | 14 | Describe the methods of handling data and combining results of studies, if done, including measures of consistency (e.g., $I^2$ ) for each meta-analysis.                                                                                                                                                   | 9-10                    |

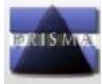

# PRISMA 2009 Checklist

| Section/topic                 | #  | Checklist item                                                                                                                                                                                           | Reported on page # |
|-------------------------------|----|----------------------------------------------------------------------------------------------------------------------------------------------------------------------------------------------------------|--------------------|
| Risk of bias across studies   | 15 | Specify any assessment of risk of bias that may affect the cumulative evidence (e.g., publication bias, selective reporting within studies).                                                             | 9-10               |
| Additional analyses           | 16 | Describe methods of additional analyses (e.g., sensitivity or subgroup analyses, meta-regression), if done, indicating which were pre-specified.                                                         | 9-10               |
| <b>RESULTS</b>                |    |                                                                                                                                                                                                          |                    |
| Study selection               | 17 | Give numbers of studies screened, assessed for eligibility, and included in the review, with reasons for exclusions at each stage, ideally with a flow diagram.                                          | 10<br>Figure 1     |
| Study characteristics         | 18 | For each study, present characteristics for which data were extracted (e.g., study size, PICOS, follow-up period) and provide the citations.                                                             | 10-11<br>Table 1   |
| Risk of bias within studies   | 19 | Present data on risk of bias of each study and, if available, any outcome level assessment (see item 12).                                                                                                | 13-14<br>Figure 3  |
| Results of individual studies | 20 | For all outcomes considered (benefits or harms), present, for each study: (a) simple summary data for each intervention group (b) effect estimates and confidence intervals, ideally with a forest plot. | 12-13,<br>Figure 2 |
| Synthesis of results          | 21 | Present results of each meta-analysis done, including confidence intervals and measures of consistency.                                                                                                  | 12-13<br>Figure 2  |
| Risk of bias across studies   | 22 | Present results of any assessment of risk of bias across studies (see Item 15).                                                                                                                          | 15-16<br>Table 2   |
| Additional analysis           | 23 | Give results of additional analyses, if done (e.g., sensitivity or subgroup analyses, meta-regression [see Item 16]).                                                                                    | 14-15              |
| <b>DISCUSSION</b>             |    |                                                                                                                                                                                                          |                    |
| Summary of evidence           | 24 | Summarize the main findings including the strength of evidence for each main outcome; consider their relevance to key groups (e.g., healthcare providers, users, and policy makers).                     | 17-20              |
| Limitations                   | 25 | Discuss limitations at study and outcome level (e.g., risk of bias), and at review-level (e.g., incomplete retrieval of identified research, reporting bias).                                            | 20-21              |
| Conclusions                   | 26 | Provide a general interpretation of the results in the context of other evidence, and implications for future research.                                                                                  | 21                 |
| <b>FUNDING</b>                |    |                                                                                                                                                                                                          |                    |
| Funding                       | 27 | Describe sources of funding for the systematic review and other support (e.g., supply of data); role of funders for the systematic review.                                                               | 22                 |

41

42 From: Moher D, Liberati A, Tetzlaff J, Altman DG, The PRISMA Group (2009). Preferred Reporting Items for Systematic Reviews and Meta-Analyses: The PRISMA Statement. PLoS Med 6(6): e1000097.  
43 doi:10.1371/journal.pmed1000097

44

For more information, visit: [www.prisma-statement.org](http://www.prisma-statement.org).

45

For peer review only - <http://bmjopen.bmj.com/site/about/guidelines.xhtml>

46

47

# BMJ Open

## Deprescribing Fall-Risk-Increasing Drugs (FRIDs) for the Prevention of Falls and Fall-related Complications: A Systematic Review and Meta-analysis

|                                 |                                                                                                                                                                                                                                                                                                                                                                                                                                                                                                                                                                                                                                                                                                                                                     |
|---------------------------------|-----------------------------------------------------------------------------------------------------------------------------------------------------------------------------------------------------------------------------------------------------------------------------------------------------------------------------------------------------------------------------------------------------------------------------------------------------------------------------------------------------------------------------------------------------------------------------------------------------------------------------------------------------------------------------------------------------------------------------------------------------|
| Journal:                        | <i>BMJ Open</i>                                                                                                                                                                                                                                                                                                                                                                                                                                                                                                                                                                                                                                                                                                                                     |
| Manuscript ID                   | bmjopen-2019-035978.R3                                                                                                                                                                                                                                                                                                                                                                                                                                                                                                                                                                                                                                                                                                                              |
| Article Type:                   | Original research                                                                                                                                                                                                                                                                                                                                                                                                                                                                                                                                                                                                                                                                                                                                   |
| Date Submitted by the Author:   | 20-Nov-2020                                                                                                                                                                                                                                                                                                                                                                                                                                                                                                                                                                                                                                                                                                                                         |
| Complete List of Authors:       | Lee, Justin; McMaster University, Division of Geriatric Medicine, Department of Medicine; McMaster University, Department of Health Research Methods, Evidence and Impact<br>Negm, AM; McMaster University Faculty of Health Sciences, School of Rehabilitation Sciences; Hamilton Health Sciences, Geriatric Education and Research in Aging Sciences Centre<br>Peters, Ryan; Queen's University, Department of Medicine<br>Wong, Eric; University of Toronto, Division of Geriatric Medicine, Department of Medicine<br>Holbrook, Anne; McMaster University, Division of Clinical Pharmacology and Toxicology, Department of Medicine; McMaster University Faculty of Health Sciences, Department of Health Research Methods, Evidence and Impact |
| <b>Primary Subject Heading</b>: | Geriatric medicine                                                                                                                                                                                                                                                                                                                                                                                                                                                                                                                                                                                                                                                                                                                                  |
| Secondary Subject Heading:      | Pharmacology and therapeutics, General practice / Family practice, Evidence based practice                                                                                                                                                                                                                                                                                                                                                                                                                                                                                                                                                                                                                                                          |
| Keywords:                       | INTERNAL MEDICINE, CLINICAL PHARMACOLOGY, GERIATRIC MEDICINE, PRIMARY CARE                                                                                                                                                                                                                                                                                                                                                                                                                                                                                                                                                                                                                                                                          |
|                                 |                                                                                                                                                                                                                                                                                                                                                                                                                                                                                                                                                                                                                                                                                                                                                     |

SCHOLARONE™  
Manuscripts



I, the Submitting Author has the right to grant and does grant on behalf of all authors of the Work (as defined in the below author licence), an exclusive licence and/or a non-exclusive licence for contributions from authors who are: i) UK Crown employees; ii) where BMJ has agreed a CC-BY licence shall apply, and/or iii) in accordance with the terms applicable for US Federal Government officers or employees acting as part of their official duties; on a worldwide, perpetual, irrevocable, royalty-free basis to BMJ Publishing Group Ltd ("BMJ") its licensees and where the relevant Journal is co-owned by BMJ to the co-owners of the Journal, to publish the Work in this journal and any other BMJ products and to exploit all rights, as set out in our [licence](#).

The Submitting Author accepts and understands that any supply made under these terms is made by BMJ to the Submitting Author unless you are acting as an employee on behalf of your employer or a postgraduate student of an affiliated institution which is paying any applicable article publishing charge ("APC") for Open Access articles. Where the Submitting Author wishes to make the Work available on an Open Access basis (and intends to pay the relevant APC), the terms of reuse of such Open Access shall be governed by a Creative Commons licence – details of these licences and which [Creative Commons](#) licence will apply to this Work are set out in our licence referred to above.

Other than as permitted in any relevant BMJ Author's Self Archiving Policies, I confirm this Work has not been accepted for publication elsewhere, is not being considered for publication elsewhere and does not duplicate material already published. I confirm all authors consent to publication of this Work and authorise the granting of this licence.



1  
2  
3 **TITLE:** Deprescribing Fall-Risk-Increasing Drugs (FRIDs) for the Prevention of Falls and  
4  
5 Fall-related Complications: A Systematic Review and Meta-analysis  
6  
7  
8  
9

10 **AUTHORS:** Justin Lee, BScPhm, ACPR, MD<sup>1,2,3</sup>

11  
12 Ahmed Negm, MD, MSc, PhD<sup>3,4</sup>

13  
14 Ryan Peters, BSc, MD<sup>5</sup>

15  
16 Eric Wong, BSc, MD<sup>6</sup>

17  
18 Anne Holbrook, MD, PharmD, MSc<sup>2,7</sup>  
19  
20  
21  
22  
23

24 <sup>1</sup>Division of Geriatric Medicine, Department of Medicine, McMaster University, Hamilton,  
25 Ontario, Canada

26 <sup>2</sup>Department of Health Research Methods, Evidence, and Impact, McMaster University,  
27 Hamilton,  
28 Ontario, Canada

29 <sup>3</sup>Geriatric Education and Research in Aging Sciences (GERAS) Centre, Hamilton, Ontario,  
30 Canada

31 <sup>4</sup>School of Rehabilitation Sciences, Faculty of Health Sciences, McMaster University, Hamilton  
32 Ontario, Canada;

33 <sup>5</sup>Department of Medicine, Queen's University, Kingston, Ontario, Canada

34 <sup>6</sup>Division of Geriatric Medicine, Department of Medicine, University of Toronto, Toronto,  
35 Ontario, Canada

36 <sup>7</sup>Division of Clinical Pharmacology and Toxicology, Department of Medicine, McMaster  
37 University, Hamilton, Ontario, Canada  
38  
39  
40

41 **CORRESPONDING AUTHOR:** Justin Lee  
42 Geriatric Education and Research in Aging Sciences Centre  
43 88 Maplewood Avenue, Room 158  
44 Hamilton, Ontario, Canada L8M 1W9  
45 Email: [justin.lee@medportal.ca](mailto:justin.lee@medportal.ca)  
46 Telephone: (905) 521-2100  
47  
48

49 **MAIN TEXT WORD COUNT:** 3724 (excluding title page, abstract, references, tables)  
50  
51  
52  
53  
54  
55  
56  
57  
58  
59  
60

**ABSTRACT:**

**Objectives:** Prevention of falls and fall-related injuries is a priority due to the substantial health and financial burden of falls on patients and healthcare systems. Deprescribing medications known as “fall-risk increasing drugs” (FRIDs) is a common strategy to prevent falls. We conducted a systematic review to determine its efficacy for the prevention of falls and fall-related complications.

**Design:** Systematic review and meta-analysis

**Data sources:** MEDLINE, EMBASE, CENTRAL, CINAHL and grey literature from inception to August 1, 2020.

**Eligibility criteria for selecting studies:** Randomized controlled trials of FRID withdrawal compared to usual care evaluating the rate of falls, incidence of falls, fall-related injuries, fall-related fractures, fall-related hospitalizations or adverse effects related to the intervention in adults aged  $\geq 65$  years.

**Data extraction and synthesis:** Two reviewers independently performed citation screening, data abstraction, risk of bias assessment and certainty of evidence grading. Random-effects models were used for meta-analyses.

**Results:** Five trials involving 1305 participants met eligibility criteria. Deprescribing FRIDs did not change the rate of falls (rate ratio [RaR] 0.98, 95% CI 0.63 to 1.51), the incidence of falls (risk difference [RD] 0.01, 95% CI -0.06 to 0.09; relative risk [RR] 1.04, 95% CI 0.86 to 1.26) or rate

1  
2  
3 of fall-related injuries (RaR 0.89, 95% CI 0.57 to 1.39) over a 6 to 12 month follow-up period. No  
4 trials evaluated the impact of deprescribing FRIDs on fall-related fractures or hospitalizations.  
5  
6  
7  
8  
9

10 **Conclusion:** There is a paucity of robust high-quality evidence to support or refute that a FRID  
11 deprescribing strategy alone is effective at preventing falls or falls-related injury in older adults.  
12 Although there may be other reasons to deprescribe FRIDs, our systematic review found that it  
13 may result in little to no difference in the rate or risk of falls as an sole falls reduction strategy.  
14  
15  
16  
17  
18  
19  
20

21 **Registration:** PROSPERO CRD42016040203  
22  
23  
24  
25

26 **Key Words:** Falls, Falls prevention, Fall-risk increasing drug (FRID), Deprescribing, Medication  
27 withdrawal, Seniors, Older Adults, Systematic review  
28  
29  
30  
31  
32

33 **Word Count: 295**  
34  
35  
36  
37  
38  
39  
40  
41  
42  
43  
44  
45  
46  
47  
48  
49  
50  
51  
52  
53  
54  
55  
56  
57  
58  
59  
60

## ARTICLE SUMMARY

### Strengths and Limitations of this Study:

- This study's results are based on a systematic review and meta-analysis of randomised controlled trials
- We employed rigorous analytic methods and interpretational approaches including duplicate assessment, subgroup credibility criteria and optimal information size considerations.
- We assessed the certainty in evidence (i.e. quality of evidence) using the Grading of Recommendations, Assessment, Development and Evaluation (GRADE) Framework.
- Additional studies are needed to reach the optimal information size to reduce uncertainty about this intervention and establish its relative importance in the range of possible fall prevention interventions

## INTRODUCTION

Falls and fall-related injuries are significant public health concerns. Every year, 1 in 3 older adults aged  $\geq 65$  years falls and 10% of these falls cause serious injury or hospitalization.[1] Falls are estimated to annually cost \$50 billion in the United States, \$2 billion in Canada, and £2.3 billion in the United Kingdom.[2–4] All jurisdictional levels are making significant investments to implement falls prevention quality improvement initiatives. These include Public Health England’s National Falls Prevention Coordinating Group (NFPRCG), the Centers for Disease Control and Prevention (CDC) Stopping Elderly Accidents, Deaths, & Injuries (STEADI) Initiative, and Health Canada’s Canadian Patient Safety Institute “Reducing Falls and Injuries from Falls” initiative. National accreditation bodies such as the United States Joint Commission and Accreditation Canada also mandate specific falls prevention activities of healthcare organizations through their required organizational practices and standards.

Since the majority of falls result from multiple factors (e.g. poor strength and balance, visual and cognitive impairment), current practice guidelines and accreditation standards focus on multi-factorial assessment and intervention strategies.[5] These strategies involve the combination of two or more interventions (e.g. exercise, home or environmental modification, vision assessment, education, medication management, vitamin D supplementation). However, the 2018 United States Preventive Services Task Force evidence report recommends that multifactorial interventions only be offered to select patients because the overall net benefit is small.[6] In fact, there is ongoing debate on the relative merits of focusing on single versus multifactorial interventions, and many clinicians and institutions focus on single interventions due to limited resources.[7]

1  
2  
3 As an individual intervention, only exercise has robust evidence demonstrating reductions  
4 in the incidence of fallers and rate of injurious falls.[6,8] It is unclear if other parts of the multi-  
5 component strategy are effective, how large is their individual treatment effect, and which  
6 components should be prioritized when resources are limited.  
7  
8  
9  
10

11  
12 Although there is limited evidence of effectiveness, deprescribing medications known as  
13 “fall-risk increasing drugs” (FRIDs) is common practice and typically included in both  
14 multifactorial and single intervention strategies. The justification is based on observational studies  
15 that suggest certain medications are associated with increased falls risk as well as some  
16 randomized controlled trials (RCTs) that have shown that medication management interventions  
17 (including those with a broader focus of reducing polypharmacy and/or potentially inappropriate  
18 prescribing) may reduce the risk of falls.[9] FRIDs include anti-hypertensives, anti-arrhythmics,  
19 anti-cholinergics, anti-histamines, sedatives-hypnotics, anti-psychotics, anti-depressants, opioids  
20 and NSAIDs.[10–15]. Although the mechanisms are not fully understood, these drugs may  
21 influence falls risk by adversely affecting the cardiovascular or central nervous system (e.g.  
22 orthostatic hypotension, bradycardia, sedation, sleep disturbance, confusion, dizziness).  
23  
24  
25  
26  
27  
28  
29  
30  
31  
32  
33  
34  
35  
36  
37

38 Key issues affecting the quality of this observational evidence and certainty of a causal  
39 relationship include: (1) variable adjustment for confounders, dosage or duration of therapy, (2)  
40 medication use confirmed only at baseline (but not throughout follow-up), and (3) potential  
41 prescribing bias associated with specific medication classes. Most meta-analyses have also been  
42 based on the pooling of unadjusted estimates and thus susceptible to bias including confounding  
43 by indication. As a result, it is unclear whether the observed increase in falls is causally related to  
44 such drug use versus the underlying conditions or patients for which the drugs are treating.  
45  
46  
47  
48  
49  
50  
51  
52  
53  
54  
55  
56  
57  
58  
59  
60

1  
2  
3 With the aim of evaluating its effectiveness as a single falls prevention strategy, we  
4 conducted this systematic review to answer the following: “In older adults aged 65 years or older,  
5 does deprescribing and the withdrawal of fall-risk increasing drugs (FRIDs) decrease the risk of  
6 falls compared to usual care and continuation of these drugs?” To the best of our knowledge, no  
7 previous systematic review has addressed this specific research question.  
8  
9  
10  
11  
12  
13  
14  
15  
16

## 17 **METHODS**

18  
19 This review was developed using the Cochrane Handbook and reported in accordance with  
20 the Preferred Reporting Items for Systematic Reviews and Meta-Analyses (PRISMA)  
21 guidelines.[16,17] The protocol was registered in PROSPERO (CRD42016040203) and  
22 previously published and described in detail.[18]  
23  
24  
25  
26  
27  
28  
29  
30

### 31 **Search Strategy**

32  
33 MEDLINE, EMBASE, CINAHL and the Cochrane Central Register of Controlled Trials  
34 (CENTRAL) electronic databases were searched from inception to August 1, 2020 using a  
35 combination of Medical Subject Headings, controlled and free-text terms synonymous for the  
36 intervention. The MEDLINE search strategy is shown in Supplementary Figure S1. This strategy  
37 was modified for use in other databases.  
38  
39  
40  
41  
42  
43

44 Reference lists of relevant studies, reviews and guidelines were reviewed to identify  
45 additional studies. Trial registries and geriatric medicine conference abstracts were also reviewed.  
46  
47  
48  
49  
50

### 51 **Study Eligibility Criteria**

52  
53  
54  
55  
56  
57  
58  
59  
60

1  
2  
3 After pilot testing the eligibility criteria, pairs of reviewers independently conducted  
4 screening. A third reviewer resolved disagreements.  
5  
6

7  
8 Studies were included if they were RCTs evaluating FRID deprescribing or withdrawal  
9 with the intent of reducing falls. FRID deprescribing was defined as the planned and supervised  
10 discontinuation or dose reduction of single or multiple medications thought to independently  
11 increase falls risk.[10–12]  
12  
13  
14

15  
16  
17 The comparator could be usual care (i.e. no change in usual activities and/or no FRID  
18 withdrawal) or a control intervention not thought to reduce falls. Studies focused on adults aged  
19  $\geq 65$  years from all settings were included. Studies involving FRID withdrawal within multi-  
20 component interventions were excluded if the effect of FRID withdrawal could not be isolated.  
21  
22  
23  
24

25  
26 The primary outcomes of this review were the (1) rate of falls (defined as the total number  
27 of falls per unit of person time that falls were monitored) and (2) incidence of falls (i.e. number of  
28 fallers). Secondary outcomes included the incidence of (1) fall-related fractures, (2) fall-related  
29 injuries, (3) fall-related hospitalization, (4) adverse effects related to the withdrawal intervention  
30 (e.g. disease relapse, symptomatic withdrawal).  
31  
32  
33  
34  
35  
36  
37  
38  
39

#### 40 **Data Extraction and Quality Assessment**

41  
42 Two reviewers independently abstracted data on study characteristics, participants,  
43 interventions, comparisons, and outcomes using standardized electronic data extraction forms.  
44  
45  
46 Disagreements were resolved through consensus.  
47  
48

49 Two reviewed independently conducted risk of bias (RoB) assessments using the Cochrane  
50 Risk of Bias tool.[19] A previously published modification to the RoB assessment was employed  
51 to estimate unclearly reported study methods and allow for sensitivity analysis.[20] This  
52  
53  
54  
55  
56  
57  
58  
59



1  
2  
3 modification involved a structured approach where a score of “definitely low risk”, “probably low  
4 risk”, “probably high risk”, or “definitely high risk” was assigned to each RoB criterion.  
5  
6 “Definitely” and “probably” scores were collapsed for both low and high RoB scores.  
7  
8 Disagreements were resolved through consensus.  
9  
10  
11  
12  
13

## 14 **Data Synthesis and Analysis**

15  
16 The rate of falls was reported as a rate ratio (RaR) with a 95% confidence interval (CI).  
17  
18 Dichotomous outcomes (i.e. incidences of falls, fall-related fracture, fall-related injury, fall-related  
19 hospitalization and adverse effects related to the withdrawal intervention) have been reported as  
20 risk ratios (RR) with 95% CIs.  
21  
22  
23  
24  
25

26 We used RevMan 5.3 and the intention-to-treat principle for all statistical analyses. We  
27 conducted meta-analyses using the generic inverse variance method to allow pooling of effect  
28 estimates. A random effects model was used given expected between-trial variations in  
29 methodological, participant and medication characteristics between studies. We had originally  
30 planned to pool data at various pre-specified time intervals, but all included studies had follow-up  
31 between 6 to 12 months.  
32  
33  
34  
35  
36  
37  
38  
39

40 We assessed heterogeneity through visual inspection of forest plots and statistical tests. A  
41 two-tailed test with p-value <0.10 was considered significant for all Chi-square analyses as per  
42 recommendations from the Cochrane Handbook and the  $I^2$  was interpreted using the Cochrane  
43 Collaboration thresholds.[16]  
44  
45  
46  
47  
48

49 Heterogeneity was explored in subgroup analyses based on five a priori hypotheses  
50 (Supplementary Table S1).[18] These included differences in baseline propensity for falls as  
51 influenced by (1) a history of recurrent falls (e.g. known faller or not) or (2) place of residence or  
52  
53  
54  
55  
56  
57  
58  
59  
60

1  
2  
3 care (e.g. community, long-term care); differences in the intervention as influenced by (3) specific  
4 medication class(es) chosen for withdrawal and (4) preceding medication review by a clinician for  
5 FRID withdrawal appropriateness; as well as differences in methodology based on (5) definitions  
6 used for “falls” (e.g., observed vs. self-reported). We assessed the credibility of any apparent  
7 subgroup effects using eleven previously published criteria recommended by the Cochrane  
8 Handbook.[21]  
9

10  
11  
12 A priori sensitivity analyses were conducted to explore the impact of low vs. high RoB  
13 based on blinding and attrition. Studies did not report per-protocol results that would allow for our  
14 planned intention-to-treat vs. per-protocol sensitivity analysis. The impact of using a fixed vs.  
15 random effects model was explored in a post hoc sensitivity analysis.  
16

17  
18  
19 The confidence in effect estimates for each reported outcome was assessed using the  
20 Grading of Recommendations, Assessment, Development and Evaluation (GRADE) approach.[22]  
21  
22  
23

### 24 25 26 27 28 29 30 31 32 33 **Patient and Public Involvement**

34 Patients and the public were not involved in this review.  
35  
36  
37  
38  
39

## 40 41 42 43 44 45 46 47 48 49 50 51 52 53 **RESULTS**

44 Of 891 citations identified, 31 were relevant for full text review and 6 met eligibility criteria  
45 ( $\kappa=0.79$ , 95% CI 0.51-1.00, substantial agreement). One study was available as an abstract, but it  
46 did not report its falls data.[23] Data were requested from the authors, but we did not receive a  
47 response. The PRISMA flow diagram summarizing our search results is shown in Figure 1.  
48  
49  
50  
51  
52

### 53 54 55 56 57 58 59 60 **Study Characteristics**

1  
2  
3 The included trials in our review are described in Table 1.  
4  
5  
6  
7  
8  
9  
10  
11  
12  
13  
14  
15  
16  
17  
18  
19  
20  
21  
22  
23  
24  
25  
26  
27  
28  
29  
30  
31  
32  
33  
34  
35  
36  
37  
38  
39  
40  
41  
42  
43  
44  
45  
46  
47  
48  
49  
50  
51  
52  
53  
54  
55  
56  
57  
58  
59  
60

**Table 1: Characteristics of Included Studies**

| Author, Year        | Study Design | Population                                                                                                                                                                                                                                                              | Sample Size                                                                                          | Age Mean (SD) | Targeted FRIDs                                                                                                                                                                                                                             | Intervention                                                                                                                                                                                                                                                                                                                                  | Control                                                                                                                                                                          | Study Outcomes                            |
|---------------------|--------------|-------------------------------------------------------------------------------------------------------------------------------------------------------------------------------------------------------------------------------------------------------------------------|------------------------------------------------------------------------------------------------------|---------------|--------------------------------------------------------------------------------------------------------------------------------------------------------------------------------------------------------------------------------------------|-----------------------------------------------------------------------------------------------------------------------------------------------------------------------------------------------------------------------------------------------------------------------------------------------------------------------------------------------|----------------------------------------------------------------------------------------------------------------------------------------------------------------------------------|-------------------------------------------|
| Blalock 2010 [24]   | RCT          | 1) Community setting<br>2) Age $\geq$ 65<br>3) Speak, read English<br>4) $\geq$ 4 prescription medications<br>5) $\geq$ 1 high falls-risk medication<br>6) $\geq$ 1 fall not attributable to syncope within previous year                                               | 186<br>(93 I/93 C)                                                                                   | 74.8 (6.9)    | Benzodiazepines, antidepressants, anticonvulsants, sedative hypnotics, opioid analgesics, antipsychotics, and skeletal muscle relaxants                                                                                                    | 1) Pharmacist medication review<br>2) Physician coordinated medication changes<br>3) Fall brochure, home safety checklist                                                                                                                                                                                                                     | 1) Fall brochure, home safety checklist                                                                                                                                          | 1) Rate of falls<br>2) Incidence of falls |
| Campbell 1999 [25]  | RCT          | 1) Community setting<br>2) Age $\geq$ 65<br>3) Using benzodiazepine, other hypnotic, anti-depressant or major tranquilizer<br>4) Ambulatory<br>5) No physiotherapy<br>6) General practitioner thought psychotropic medication withdrawal beneficial                     | 93<br><br>Arm 1:<br>24 (I)<br><br>Arm 2:<br>24 (I)<br><br>Arm 3:<br>21 (C)*<br><br>Arm 4:<br>24 (C)* | 74.7 (7.2)    | Psychotropic medications (e.g. benzodiazepines, hypnotics, antidepressants, tranquilizers)                                                                                                                                                 | <u>Arm 1</u><br>1) Withdrawal of psychotropic medication over 14 weeks<br>2) Placebo substitution<br>3) Home exercise programme<br><br><u>Arm 2</u><br>1) Psychotropic medication withdrawal<br>2) Placebo substitution<br>3) No home exercise programme                                                                                      | <u>Arm 3</u><br>1) No change in psychotropic medication<br>2) Home exercise programme<br><br><u>Arm 4</u><br>1) No change in psychotropic medication<br>2) No exercise programme | 1) Rate of falls<br>2) Incidence of falls |
| Mott 2016 [26]      | Cluster RCT  | 1) Community setting<br>2) Age $\geq$ 65<br>3) English-speaking<br>4) Fall in last 12 months/fear of falling<br>5) Workshop participation<br>6) Capable of consent                                                                                                      | 80<br>(39 I/41 C)                                                                                    | 75.6 (6.5)    | Neuroleptics, benzodiazepines, anti-depressants, sedative-hypnotics, anti-hypertensives, cyclobenzaprine, carisoprodol, sedating antihistamines, oxybutynin, carbamazepine, methocarbamol, prochlorperazine, benzotropine, trihexiphenidyl | 1) FRID pharmacist review<br>2) Medication-related action plan (MAP) developed by pharmacist for patient<br>3) Pharmacist follow-up<br>4) Patient given pamphlet describing the role of medications in falls and monthly falls calendars<br>5) Patient given pamphlet describing the role of medications in falls and monthly falls calendars | 1) Medications in falls pamphlet                                                                                                                                                 | 1) Rate of falls<br>2) Incidence of falls |
| Patterson 2010 [27] | Cluster RCT  | 1) Nursing home setting with $\geq$ 30 beds; not exclusive care of terminally ill<br>2) Age $\geq$ 65                                                                                                                                                                   | 334<br>(173 I/161 C)                                                                                 | 82.7 (8.4)    | Psychoactive medications (i.e. hypnotics, anxiolytics, antipsychotics)                                                                                                                                                                     | 1) Monthly medication review via pharmacist for appropriateness<br>2) Nurse and prescriber collaboration to improve medications                                                                                                                                                                                                               | 1) Usual care                                                                                                                                                                    | 1) Rate of falls                          |
| Boyé 2017 [28]      | RCT          | 1) Acute care emergency department setting; attended due to fall incident<br>2) Age $\geq$ 65<br>3) $\geq$ 1 FRID for $\geq$ 2 weeks prior to the fall<br>4) MMSE $\geq$ 21/30<br>5) Ambulates independently<br>6) Community dwelling<br>7) Informed consent by patient | 612<br>(319 I/293 C)                                                                                 | 80.2 (7.3)    | Anxiolytics/hypnotics, antidepressants, neuroleptics, anti-hypertensives, anti-arrhythmics, NSAIDs, H2 receptor antagonists, opioids, sympathomimetics, antihistaminics, diuretics                                                         | 1) Investigator conducted FRID assessment, proposed changes<br>2) Changes discussed with geriatrician and general practitioner/prescribing doctor<br>3) If consensus, FRID discontinued, reduced dosage, substituted for potentially safer option                                                                                             | 1) Usual care                                                                                                                                                                    | 1) Rate of falls<br>2) Incidence of falls |

43 **Abbreviations:** FRID = Fall-risk-increasing drug, I = Intervention, C = Control

44 \* Arm 3 and Arm 4 classified as controls due to lack of FRID withdrawal in these arms of the factorial design

1  
2  
3 Three studies were individually randomized, while two studies were cluster randomized by either  
4 nursing home or health centre. Studies ranged in size from 80 to 612 participants. With exception  
5 of one study[26], studies were multi-centre involving 144 sites and 4 countries. All were conducted  
6 in the community setting except for one conducted in long-term care.[27] Follow-up periods  
7 ranged from 6 to 12 months.  
8  
9

10  
11 Overall, there were 1305 participants across all trials. Most were female (>70%) and had a  
12 falls history (78.9%). Several key confounders were not reported in the studies including: (1)  
13 baseline number and types of FRIDs, (2) baseline number of medications, and (3) baseline number  
14 and types of co-morbidities. All these factors are thought to potentially modify falls risk.[29,30]  
15  
16

17 All interventions included a preceding assessment for FRID deprescribing appropriateness.  
18 This was conducted by physicians in 2 trials and pharmacists in 3 trials. Three trials tried to  
19 withdraw any FRID, while others focused on sedative-hypnotics, antipsychotics, or  
20 antidepressants. Successful discontinuation and adherence to deprescribing protocols were low in  
21 all studies. Rates of complete discontinuation of at least one FRID ranged from 10 to 40%.  
22  
23

24 In terms of our study outcomes, 4 trials measured the rate of falls and 4 measured falls  
25 incidence. One trial reported fall-related injuries.[24] Fall-related fractures, fall-related  
26 hospitalization or deprescribing-related adverse effects were not measured by any of the trials.  
27  
28  
29  
30  
31  
32

## 33 34 35 36 37 38 39 40 41 42 43 44 **Summary of Findings**

### 45 46 47 **Rate and Incidence of Falls**

48  
49 Four studies reported the effect of deprescribing FRIDs on the rate of falls. Deprescribing  
50 FRIDs did not reduce the rate of falling (RaR 0.98, 95% CI 0.63 to 1.51; Figure 2 – Analysis 1.1).  
51  
52  
53  
54  
55  
56  
57  
58  
59  
60

1  
2  
3 Considerable statistical heterogeneity was present ( $\chi^2=17.47$ ,  $p=0.0006$ ,  $I^2=83\%$ ) and subsequently  
4 explored in subgroup analysis.  
5  
6

7  
8 Four studies reported the effect of deprescribing FRIDs on the risk of falls as measured by  
9 falls incidence. Deprescribing FRIDs did not reduce the incidence of falls (RR 1.04, 95% CI 0.86  
10 to 1.26,  $I^2 = 19\%$ ,  $\chi^2=3.70$ ,  $p = 0.30$ ; Figure 2 – Analysis 2.1). In absolute terms, there was a non-  
11 significant risk difference increase of 0.01 (95% CI -0.06 to 0.09,  $I^2 = 22\%$ ,  $p=0.76$ ; Figure 2 –  
12 Analysis 2.2)  
13  
14  
15  
16  
17  
18

### 19 20 21 ***Rate of Injurious Falls*** 22

23  
24 One trial reported the effect of deprescribing FRIDs on fall-related injuries.[24]  
25 Deprescribing FRIDs did not reduce the rate of fall-related injuries (RaR 0.89, 95% CI 0.57 to  
26 1.39; Figure 2 – Analysis 3.1). This trial did not report data that would allow for any of our pre-  
27 planned subgroup analyses.  
28  
29  
30  
31  
32

### 33 34 35 **Risk of Bias Assessment** 36

37  
38 Figure 3 summarizes our RoB assessments. All studies were deemed at high risk of bias in  
39 at least one domain. The overall mean weighted kappa across all assessments was 0.67 (moderate  
40 agreement). For individual RoB assessments, kappa ranged from 0 to 0.85. Inter-rater agreement  
41 is actually higher than indicated by the calculated scores due to the “kappa co-efficient  
42 paradox”. [31,32] Low kappas (e.g.  $\kappa=0$ ) occurred despite high levels of observed agreement (e.g.  
43  $\geq 80\%$  agreement) for two RoB assessments. True agreement is falsely attributed to chance  
44 agreement by the kappa calculation when there is substantial imbalance in marginal ratings.  
45  
46  
47  
48  
49  
50  
51  
52  
53  
54  
55  
56  
57  
58  
59  
60

1  
2  
3 For falls rate and incidence, all studies except one[25] were judged at high risk of bias for  
4 lack of blinding of participants, personnel and outcome assessors. It is unclear whether blinding  
5 could have impacted behaviour or perceptions (e.g. activity risk-level, placebo effect). Risk of  
6 ascertainment bias was high in one study[27] (i.e. no standardized falls definition was used), but  
7 all other studies used methods accepted to be low risk of bias (i.e. falls recorded daily on postcards  
8 or calendars). Risk of attrition bias was deemed high in three studies based on high or unbalanced  
9 lost to follow-up rates.[24,25,28]  
10  
11  
12  
13  
14  
15  
16  
17  
18  
19  
20

### 21 ***Publication Bias***

22 Since less than 10 eligible studies were found, a funnel plot was not constructed due to an  
23 inability to make meaningful conclusions about publication bias.  
24  
25  
26  
27  
28  
29

### 30 ***Subgroup Analyses and Exploration of Heterogeneity***

31 Our pre-specified subgroup analyses did not adequately explain the statistical  
32 heterogeneity observed results for the rate and incidence of falls (Supplementary Figure S2).  
33 Deprescribing FRIDs appeared more effective when a preceding medication review was conducted  
34 by physicians compared to pharmacists ( $p=0.0004$ ,  $I^2=91.9\%$ , Analysis 1.5), while psychotropic  
35 withdrawal appeared more effective than strategies withdrawing any FRID ( $p=0.08$ ,  $I^2=67.8\%$ ,  
36 Analysis 2.3). However, in both analyses, only 6 of 11 subgroup credibility criteria were met and  
37 each subgroup was limited to one trial with less than 100 participants (Supplementary Table S2).  
38 We, therefore, judged the credibility that these subgroup effects are real as poor and uncertain.  
39  
40  
41  
42  
43  
44  
45  
46  
47  
48  
49  
50  
51  
52  
53  
54  
55  
56  
57  
58  
59  
60

1  
2  
3 The available data did not permit subgroup analyses by place of residence or falls  
4 ascertainment method. The other subgroup analyses showed no evidence of difference beyond that  
5 due to chance.  
6  
7  
8  
9

## 10 11 12 **Sensitivity Analyses** 13

14 Our sensitivity analyses are shown in Supplementary Figure S3. The incorporation of trials  
15 with high risk of performance bias appeared to mask the potential benefit of deprescribing FRIDs  
16 on reducing the incidence and rate of falls, while the trials with high risk of attrition bias appeared  
17 to mask a potential increase in falls rate with deprescribing FRIDs. These results should be  
18 interpreted cautiously and definitive conclusions cannot be made. Data from trials with low risk  
19 of performance bias were limited to one trial with less than 100 participants, and data from trials  
20 with low risk of attrition bias were limited to two trials with less than 450 participants overall.  
21  
22  
23  
24  
25  
26  
27  
28  
29

30 A post-hoc sensitivity analysis examining the impact of using a fixed vs. random effects  
31 model did not change conclusions regarding the effect of deprescribing FRIDs on the rate or  
32 incidence of falls.  
33  
34  
35  
36  
37  
38  
39

## 40 **Quality of Evidence** 41

42 The GRADE evidence profile is shown in Table 2.  
43  
44  
45  
46  
47  
48  
49  
50  
51  
52  
53  
54  
55  
56  
57  
58  
59  
60



**Table 2: GRADE Quality of Evidence Assessment**

| Certainty assessment  |                   |                      |                      |              |                      |                      | № of patients               |                    | Effect                                   |                   | Certainty        | Importance                                             |
|-----------------------|-------------------|----------------------|----------------------|--------------|----------------------|----------------------|-----------------------------|--------------------|------------------------------------------|-------------------|------------------|--------------------------------------------------------|
| № of studies          | Study design      | Risk of bias         | Inconsistency        | Indirectness | Imprecision          | Other considerations | FRID deprescribing strategy | usual care         | Relative (95% CI)                        | Absolute (95% CI) |                  |                                                        |
| Falls Rate            |                   |                      |                      |              |                      |                      |                             |                    |                                          |                   |                  |                                                        |
| 4                     | randomised trials | serious <sup>a</sup> | serious <sup>b</sup> | not serious  | serious <sup>c</sup> | none                 | 353                         | 340                | <b>Rate ratio 0.98</b><br>(0.63 to 1.51) | -                 | ⊕○○○<br>VERY LOW | IMPORTANT                                              |
| Falls Incidence       |                   |                      |                      |              |                      |                      |                             |                    |                                          |                   |                  |                                                        |
| 4                     | randomised trials | serious <sup>a</sup> | serious <sup>d</sup> | not serious  | serious <sup>c</sup> | none                 | 190/499<br>(38.1%)          | 170/472<br>(36.0%) | <b>RR 1.04</b><br>(0.86 to 1.26)         | -                 | ⊕○○○<br>VERY LOW | IMPORTANT                                              |
|                       |                   |                      |                      |              |                      |                      |                             | 33.7%              |                                          |                   |                  |                                                        |
|                       |                   |                      |                      |              |                      |                      |                             |                    |                                          |                   |                  | <b>13 more per 1,000</b><br>(from 47 fewer to 88 more) |
| Fall-Related Injuries |                   |                      |                      |              |                      |                      |                             |                    |                                          |                   |                  |                                                        |
| 1                     | randomised trials | serious <sup>a</sup> | not serious          | not serious  | serious <sup>c</sup> | none                 | 93                          | 93                 | <b>Rate ratio 0.89</b><br>(0.57 to 1.39) | -                 | ⊕⊕○○<br>LOW      | CRITICAL                                               |

1  
2  
3 We judged the quality of evidence to be low or very low for all outcomes (falls rates, falls incidence  
4 and fall-related injuries) after rating down for risk of bias, inconsistency and imprecision.  
5  
6

7  
8 We believe the optimal information size (OIS) to make definitive conclusions on the effect  
9 of deprescribing FRIDs has not yet been met as the body of evidence is based on fewer than 2000  
10 participants and less than 400 events.[33,34] This is based on the OIS calculation figure  
11 recommended by the GRADE guidelines using a well-established control falls event rate of 30%  
12 described in the literature and conservative relative risk reduction (RRR) of 20% (assuming  $\alpha =$   
13 0.05 and  $\beta = 0.2$ ).[34,35]  
14  
15  
16  
17  
18  
19  
20  
21  
22  
23

## 24 **DISCUSSION**

25  
26 This systematic review sought to determine whether deprescribing FRIDs decreased the  
27 risk of falls in older adults and found that there is a lack of robust high-quality evidence to support  
28 or refute the deprescribing of FRIDs alone as an effective fall prevention strategy. Incorporating  
29 data from 5 RCTs involving 1305 participants aged  $\geq 65$  years, our meta-analyses indicate that a  
30 FRID deprescribing strategy did not significantly change the rate of falls (RaR 0.98, 95% CI 0.63  
31 to 1.51) nor the risk of falling (RD 0.01, 95% CI -0.06 to 0.09) over a 6 to 12-month follow-up  
32 period. Although this intervention focuses on those medications thought to be associated with falls,  
33 the uncertainty of its effect on falls and conclusions of current lack of evidence of effectiveness  
34 are similar to previous systematic reviews evaluating the effectiveness of medication reviews that  
35 had a broader focus on reducing polypharmacy and potentially inappropriate prescribing (i.e. not  
36 focused solely on FRIDs).[9,36]  
37  
38  
39  
40  
41  
42  
43  
44  
45  
46  
47  
48  
49  
50

51 There is also a significant absence of evidence for clinically- and patient-important  
52 outcomes such as fall-related injuries, fractures and hospitalizations. The only trial to date that  
53  
54  
55  
56  
57  
58  
59  
60

1  
2  
3 evaluated the rate of fall-related injuries did not demonstrate a statistically significant effect (RaR  
4 0.89, 95% CI 0.57-1.39).[24] Our search found no trials measuring the impact on fall-related  
5 fractures, fall-related hospitalizations or adverse effects related to a FRID deprescribing strategy.  
6  
7 Although this may be rooted in the difficulty of conducting RCTs powered for such outcomes,  
8 their measurement and reporting are still important to inform systematic review meta-analyses that  
9  
10 could lead to more precise estimates.  
11  
12  
13  
14  
15

16  
17 Based on low-quality evidence, it is unclear whether deprescribing FRIDs as a single  
18 intervention leads to any appreciable clinically important benefit or harm. Our current best effect  
19 estimates for falls rate and incidence are centred around no appreciable difference (i.e. RaR  $\approx$  1,  
20 RR  $\approx$  1, RD  $\approx$  0). Although seemingly logical to assume, reducing isolated risk factors may not  
21 necessarily lead to a reduction in falls and fall-related complications. The absence of change in the  
22 incidence of hip fractures after statewide regulatory action on benzodiazepine prescribing in the  
23 United States that reduced benzodiazepine use by 60.3% is a real-world example of this  
24 phenomenon and the complexity of exposure-outcome relationships.[37]  
25  
26  
27  
28  
29  
30  
31  
32  
33  
34

35 Our findings likely reflect the multi-factorial nature of falls and the varying risk of different  
36 FRIDs. It is unclear as to what degree a particular risk factor or combination of risk factors (e.g.  
37 specific FRIDs) must be reduced to produce an appreciable change in falls. Medications may only  
38 have conditional or contributory causality to falls. It may be that medication-related interventions  
39 work best in combination with other interventions or only in specific contexts.  
40  
41  
42  
43  
44  
45  
46

47 Only one trial[25] included in our review demonstrated a statistically significant benefit  
48 with deprescribing FRIDs. This was also the only trial to use study capsules to operationalize  
49 blinded deprescribing of FRIDs in participants, research personnel and outcome assessors. Its  
50 results might be more reflective of the true potential physiological effect of deprescribing FRIDs  
51  
52  
53  
54  
55  
56  
57  
58  
59  
60

1  
2  
3 because it minimized the risk of performance bias. However, the magnitude of benefit achievable  
4  
5 in the non-research setting at this time may be closer to those seen in the unblinded trials due to  
6  
7 the strong psychological and behavioural factors (e.g. placebo effect) that may hinder successful  
8  
9 deprescribing. Further advances in implementation science and behavioural change strategies are  
10  
11 likely needed to facilitate medication optimization.  
12  
13

14  
15 These results raise several questions about the presumed effectiveness of deprescribing  
16  
17 FRIDs as an isolated falls prevention strategy. Given the amount of resources being invested into  
18  
19 falls prevention initiatives around the world, clinicians and organizations should examine: (1) what  
20  
21 is the strength of evidence supporting their current activities, (2) whether these activities are cost-  
22  
23 effective, and (3) whether resources are being appropriately prioritized to those interventions  
24  
25 shown to provide the most value. This should also be applied to what is being required of  
26  
27 healthcare organizations in national accreditation standards (e.g. Joint Commission, Accreditation  
28  
29 Canada) to help direct and encourage optimal use of limited healthcare resources.  
30  
31

32  
33 Clinicians and policy-makers need to consider the current lack of strong evidence for  
34  
35 deprescribing FRIDs as an isolated intervention for the specific purpose of reducing falls,  
36  
37 particularly in patients who may be very reluctant or who have strong indications for specific  
38  
39 FRIDs. FRID reduction is one out of many possible interventions that need to be considered. As  
40  
41 with prescribing medications, deprescribing is a skill and comes with the potential for harm as well  
42  
43 as benefit.[38] Thoughtful consideration of the goals, appropriateness and safety of deprescribing  
44  
45 is important.[39] Our results highlight the need for a comprehensive and individualized approach  
46  
47 to falls. Multi-component interventions are ideal, but interventions may need to be prioritized  
48  
49 depending on time, resources and context.  
50  
51  
52  
53  
54  
55  
56  
57  
58  
59  
60

1  
2  
3 Despite insufficient evidence to support or refute the deprescribing of FRIDs for falls  
4 prevention, our results do not mean that clinicians should avoid deprescribing FRIDs. There may  
5 be many other reasons to deprescribe these medications. These include avoidance of adverse drug  
6 events, improvements in cognition, increased medication adherence and drug costs savings. It is  
7 also unclear whether medication review and management with a broader focus on reducing  
8 polypharmacy and potentially inappropriate prescribing in older adults may be beneficial in  
9 preventing falls. Some RCTs with such interventions have shown a reduction of falls risk, while  
10 others have not demonstrated a significant difference.[40–46]  
11  
12  
13  
14  
15  
16  
17  
18  
19  
20

21 Our review highlights the need for future FRID deprescribing trials that evaluate patient-  
22 important outcomes (e.g. injuries, fractures and hospitalizations). Greater attention to optimal  
23 design and reporting is needed to minimize risk of bias and enhance our interpretation of the results.  
24 Examples include improved reporting of confounding baseline characteristics and intervention  
25 fidelity (e.g. number and types of FRIDs, degree and duration of dose reduction). Deprescribing  
26 is challenging and extra measures are likely needed to improve successful intervention adherence  
27 and follow-up.  
28  
29  
30  
31  
32  
33  
34  
35  
36  
37  
38  
39

## 40 **STRENGTHS AND LIMITATIONS**

41  
42 Our review has limitations. There was variation in the operationalization of FRID  
43 deprescribing and degree of success achieved (e.g. dose reduction only, completion  
44 discontinuation, non-adherence). This presumably makes the detection of any potential benefit less  
45 likely and our conclusions more conservative. However, the effect estimates are likely more  
46 indicative of what might be expected outside of the research setting. These phenomena likely  
47 represent the real-life challenges of deprescribing (especially with certain types of FRIDs such as  
48  
49  
50  
51  
52  
53  
54  
55  
56  
57  
58  
59  
60

1  
2  
3 psychotropics or opioids). Moreover, our ability to assess for confounders modifying falls risk was  
4  
5 limited due to inconsistent reporting of relevant baseline characteristics and lack of patient-level  
6  
7 data. Lastly, our ability to make definitive conclusions is limited because the total sample size  
8  
9 across studies for each outcome did not yet meet our calculated estimate for the required optimal  
10  
11 information size.  
12  
13

14  
15 Our review has several strengths. First, our search was comprehensive and we included a  
16  
17 rigorous grey literature search for unpublished studies. Second, we employed optimal analytical  
18  
19 and interpretational approaches including duplicate assessment, subgroup credibility criteria and  
20  
21 optimal information size considerations. Third, unlike previous medication-focused reviews, we  
22  
23 applied the GRADE approach to assess the quality of evidence and our degree of confidence in  
24  
25 the results.  
26  
27  
28  
29

## 30 31 **CONCLUSIONS**

32  
33 Our systematic review found that deprescribing FRIDs as an isolated strategy results in  
34  
35 little to no difference in the rate and risk of falls or falls-related injuries, but the evidence is still  
36  
37 sparse and very low quality. Additional well-designed studies are needed to reach the optimal  
38  
39 information size to reduce uncertainty about this intervention and establish its relative importance  
40  
41 in the range of possible interventions that can be employed by clinicians and health systems to  
42  
43 reduce falls.  
44  
45  
46  
47  
48

## 49 **Acknowledgements:**

50  
51 The authors would like to thank Lois Cottrell, medical librarian at St. Joseph's Healthcare  
52  
53 Hamilton, Charlton Campus, Hamilton, Ontario, Canada and Andrea McLellan, Head of  
54  
55  
56  
57  
58  
59

1  
2  
3 Collection and Technical Services, School of Medicine liaison, at McMaster University, Hamilton,  
4 Ontario, Canada, for their assistance with the development of the search strategy.  
5  
6  
7  
8  
9

### 10 **Author Contributions:**

11  
12 JL conceptualized the study. JL and AH designed and developed the protocol. RP and EW assisted  
13 with citation review. RP and AN assisted with data extraction, risk of bias assessment and certainty  
14 of evidence grading. All authors contributed to the analysis and interpretation of results. JL drafted  
15 the initial manuscript and all authors contributed to its revision and final approval.  
16  
17  
18  
19  
20  
21  
22  
23

### 24 **Funding:**

25  
26 This research received no specific grant from any funding agency in the public, commercial or  
27 not-for-profit sectors.  
28  
29  
30  
31  
32

### 33 **Competing Interests:**

34  
35 The authors have no potential conflicts of interest to declare.  
36  
37  
38  
39

### 40 **Patient Consent for Publication:**

41  
42 None required.  
43  
44  
45  
46

### 47 **Data Sharing Statement:**

48  
49 No unpublished data are available.  
50  
51  
52  
53  
54  
55  
56  
57  
58  
59  
60

**REFERENCES:**

- 1 Hill KD, Wee R. Psychotropic drug-induced falls in older people: a review of interventions aimed at reducing the problem. *Drugs Aging* 2012;**29**:15–30. doi:10.2165/11598420-000000000-00000
- 2 Florence CS, Bergen G, Atherly A, *et al.* Medical Costs of Fatal and Nonfatal Falls in Older Adults. *J Am Geriatr Soc* 2018;**66**:693–8. doi:10.1111/jgs.15304
- 3 National Institute for Health and Care Excellence. Falls in older people: assessing risk and prevention. 2013.
- 4 Public Health Agency of Canada. Seniors' Falls in Canada. 2014.
- 5 Summary of the Updated American Geriatrics Society/British Geriatrics Society clinical practice guideline for prevention of falls in older persons. *J Am Geriatr Soc* 2011;**59**:148–57. doi:10.1111/j.1532-5415.2010.03234.x
- 6 Guirguis-Blake JM, Michael YL, Perdue LA, *et al.* Interventions to Prevent Falls in Older Adults. *JAMA* 2018;**319**:1705. doi:10.1001/jama.2017.21962
- 7 Campbell AJ, Robertson MC. Fall Prevention: Single or Multiple Interventions? Single Interventions for Fall Prevention. *J Am Geriatr Soc* 2013;**61**:281–4. doi:10.1111/jgs.12095\_2
- 8 Tricco AC, Thomas SM, Veroniki AA, *et al.* Comparisons of Interventions for Preventing Falls in Older Adults. *JAMA* 2017;**318**:1687. doi:10.1001/jama.2017.15006
- 9 Gillespie LD, Robertson MC, Gillespie WJ, *et al.* Interventions for preventing falls in older people living in the community. *Cochrane database Syst Rev* 2012;**9**:CD007146. doi:10.1002/14651858.CD007146.pub3
- 10 Leipzig RM, Cumming RG, Tinetti ME. Drugs and falls in older people: a systematic



- 1  
2  
3 review and meta-analysis: I. Psychotropic drugs. *J Am Geriatr Soc* 1999;**47**:30–9.  
4  
5  
6 11 Leipzig RM, Cumming RG, Tinetti ME. Drugs and falls in older people: a systematic  
7  
8 review and meta-analysis: II. Cardiac and analgesic drugs. *J Am Geriatr Soc* 1999;**47**:40–  
9  
10 50.  
11  
12 12 Woolcott JC, Richardson KJ, Wiens MO, *et al*. Meta-analysis of the impact of 9  
13  
14 medication classes on falls in elderly persons. *Arch Intern Med* 2009;**169**:1952–60.  
15  
16 doi:10.1001/archinternmed.2009.357  
17  
18  
19 13 de Vries M, Seppala LJ, Daams JG, *et al*. Fall-Risk-Increasing Drugs: A Systematic  
20  
21 Review and Meta-Analysis: I. Cardiovascular Drugs. *J Am Med Dir Assoc*  
22  
23 2018;**19**:371.e1-371.e9. doi:10.1016/j.jamda.2017.12.013  
24  
25  
26 14 Seppala LJ, Wermelink AMAT, de Vries M, *et al*. Fall-Risk-Increasing Drugs: A  
27  
28 Systematic Review and Meta-Analysis: II. Psychotropics. *J Am Med Dir Assoc*  
29  
30 2018;**19**:371.e11-371.e17. doi:10.1016/j.jamda.2017.12.098  
31  
32  
33 15 Seppala LJ, van de Glind EMM, Daams JG, *et al*. Fall-Risk-Increasing Drugs: A  
34  
35 Systematic Review and Meta-analysis: III. Others. *J Am Med Dir Assoc* 2018;**19**:372.e1-  
36  
37 372.e8. doi:10.1016/j.jamda.2017.12.099  
38  
39  
40 16 The Cochrane Collaboration. *Cochrane Handbook for Systematic Reviews of Interventions*  
41  
42 *Version 5.1.0 [updated March 2011]*. 2011.  
43  
44  
45 17 Moher D, Liberati A, Tetzlaff J, *et al*. Preferred reporting items for systematic reviews and  
46  
47 meta-analyses: the PRISMA statement. *Ann Intern Med* 2009;**151**:264–9, W64.  
48  
49 18 Lee JY, Holbrook A. The efficacy of fall-risk-increasing drug (FRID) withdrawal for the  
50  
51 prevention of falls and fall-related complications: protocol for a systematic review and  
52  
53 meta-analysis. *Syst Rev* 2017;**6**:33.  
54  
55  
56  
57  
58  
59  
60

- 1  
2  
3 19 Higgins JPT, Altman DG, Gøtzsche PC, *et al.* The Cochrane Collaboration's tool for  
4 assessing risk of bias in randomised trials. *BMJ* 2011;**343**:d5928.  
5  
6  
7  
8 20 Akl EA, Sun X, Busse JW, *et al.* Specific instructions for estimating unclearly reported  
9 blinding status in randomized trials were reliable and valid. *J Clin Epidemiol*  
10 2012;**65**:262–7. doi:10.1016/j.jclinepi.2011.04.015  
11  
12  
13  
14  
15 21 Sun X, Briel M, Walter SD, *et al.* Is a subgroup effect believable? Updating criteria to  
16 evaluate the credibility of subgroup analyses. *BMJ* 2010;**340**:c117.  
17  
18  
19 22 Guyatt G, Oxman AD, Akl EA, *et al.* GRADE guidelines: 1. Introduction-GRADE  
20 evidence profiles and summary of findings tables. *J Clin Epidemiol* 2011;**64**:383–94.  
21  
22  
23 23 Streim JE, Filippo S, Have T, *et al.* Antidepressant discontinuation associated with  
24 cognitive decline in older adult residents of long-term care facilities. *Am J Geriatr*  
25 *psychiatry* 2012;**20**:S147–8. doi:10.1097/01.JGP.0000413064.91948.aa  
26  
27  
28  
29  
30 24 Blalock SJ, Casteel C, Roth MT, *et al.* Impact of enhanced pharmacologic care on the  
31 prevention of falls: a randomized controlled trial. *Am J Geriatr Pharmacother*  
32 2010;**8**:428–40. doi:10.1016/j.amjopharm.2010.09.002  
33  
34  
35  
36  
37 25 Campbell AJ, Robertson MC, Gardner MM, *et al.* Psychotropic medication withdrawal  
38 and a home-based exercise program to prevent falls: a randomized, controlled trial. *J Am*  
39 *Geriatr Soc* 1999;**47**:850–3.  
40  
41  
42  
43  
44 26 Mott DA, Martin B, Breslow R, *et al.* Impact of a medication therapy management  
45 intervention targeting medications associated with falling: Results of a pilot study. *J Am*  
46 *Pharm Assoc (2003)* 2016;**56**:22–8.  
47  
48  
49  
50 27 Patterson SM, Hughes CM, Crealey G, *et al.* An evaluation of an adapted U.S. model of  
51 pharmaceutical care to improve psychoactive prescribing for nursing home residents in  
52  
53  
54  
55  
56  
57  
58  
59  
60

- 1  
2  
3 northern ireland (fleetwood northern ireland study). *J Am Geriatr Soc* 2010;**58**:44–53.  
4  
5 doi:10.1111/j.1532-5415.2009.02617.x  
6  
7  
8 28 Boyé NDA, van der Velde N, de Vries OJ, *et al*. Effectiveness of medication withdrawal  
9  
10 in older fallers: results from the Improving Medication Prescribing to reduce Risk Of  
11  
12 FALLs (IMPROveFALL) trial. *Age Ageing* 2017;**46**:142–6. doi:10.1093/ageing/afw161  
13  
14  
15 29 Tinetti M, Kumar C. The Patient Who Falls. *JAMA J Am Med Assoc* 2010;**303**:273–4.  
16  
17 doi:10.1001/jama.2009.2024  
18  
19 30 Chen Y, Zhu L-L, Zhou Q. Effects of drug pharmacokinetic/pharmacodynamic properties,  
20  
21 characteristics of medication use, and relevant pharmacological interventions on fall risk  
22  
23 in elderly patients. *Ther Clin Risk Manag* 2014;**10**:437–48. doi:10.2147/TCRM.S63756  
24  
25  
26 31 Feinstein AR, Cicchetti D V. High agreement but low kappa: I. The problems of two  
27  
28 paradoxes. *J Clin Epidemiol* 1990;**43**:543–9.  
29  
30  
31 32 Tang W, Hu J, Zhang H, *et al*. Kappa coefficient: a popular measure of rater agreement.  
32  
33 *Shanghai Arch psychiatry* 2015;**27**:62–7. doi:10.11919/j.issn.1002-0829.215010  
34  
35  
36 33 Ioannidis J, Lau J. Evolution of treatment effects over time: empirical insight from  
37  
38 recursive cumulative metaanalyses. *Proc Natl Acad Sci US A* 2001;**98**:831–6.  
39  
40 doi:10.1073/pnas.021529998  
41  
42  
43 34 Guyatt GH, Oxman AD, Kunz R, *et al*. GRADE guidelines 6. Rating the quality of  
44  
45 evidence--imprecision. *J Clin Epidemiol* 2011;**64**:1283–93.  
46  
47 doi:10.1016/j.jclinepi.2011.01.012  
48  
49  
50 35 O’Loughlin JL, Robitaille Y, Boivin JF, *et al*. Incidence of and risk factors for falls and  
51  
52 injurious falls among the community-dwelling elderly. *Am J Epidemiol* 1993;**137**:342–54.  
53  
54  
55 36 Guirguis-Blake JM, Michael YL, Perdue LA, *et al*. *Interventions to Prevent Falls in*  
56  
57  
58  
59  
60

- 1  
2  
3 *Community-Dwelling Older Adults: A Systematic Review for the U.S. Preventive Services*  
4 *Task Force.* Agency for Healthcare Research and Quality (US) 2018.  
5  
6  
7  
8 37 Wagner AK, Ross-Degnan D, Gurwitz JH, *et al.* Effect of New York State regulatory  
9  
10 action on benzodiazepine prescribing and hip fracture rates. *Ann Intern Med* 2007;**146**:96–  
11  
12 103.  
13  
14  
15 38 Reeve E, Moriarty F, Nahas R, *et al.* A narrative review of the safety concerns of  
16  
17 deprescribing in older adults and strategies to mitigate potential harms. *Expert Opin Drug*  
18  
19 *Saf* 2018;**17**:39–49. doi:10.1080/14740338.2018.1397625  
20  
21  
22 39 Lee JY, Farrell B, Holbrook AM. De-prescribing benzodiazepine receptor agonists taken  
23  
24 for insomnia: a review and key messages from practice guidelines. *Polish Arch Intern*  
25  
26 *Med* 2018;**129**:839–45. doi:10.20452/pamw.4391  
27  
28  
29 40 Pit SW, Byles JE, Henry DA, *et al.* A Quality Use of Medicines program for general  
30  
31 practitioners and older people: a cluster randomised controlled trial. *Med J Aust*  
32  
33 2007;**187**:23–30.  
34  
35  
36 41 Weber V, White A, McIlvried R. An electronic medical record (EMR)-based intervention  
37  
38 to reduce polypharmacy and falls in an ambulatory rural elderly population. *J Gen Intern*  
39  
40 *Med* 2008;**23**:399–404.  
41  
42  
43 42 Zermansky AG, Alldred DP, Petty DR, *et al.* Clinical medication review by a pharmacist  
44  
45 of elderly people living in care homes--randomised controlled trial. *Age Ageing*  
46  
47 2006;**35**:586–91. doi:10.1093/ageing/afl075  
48  
49  
50 43 Frankenthal D, Lerman Y, Kalendaryev E, *et al.* Intervention with the screening tool of  
51  
52 older persons potentially inappropriate prescriptions/screening tool to alert doctors to right  
53  
54 treatment criteria in elderly residents of a chronic geriatric facility: a randomized clinical  
55  
56  
57  
58  
59

- 1  
2  
3 trial. *J Am Geriatr Soc* 2014;**62**:1658–65. doi:10.1111/jgs.12993  
4  
5  
6 44 Michalek C, Wehling M, Schlitzer J, *et al*. Effects of ‘Fit fOR The Aged’ (FORTA) on  
7  
8 pharmacotherapy and clinical endpoints--a pilot randomized controlled study. *Eur J Clin*  
9  
10 *Pharmacol* 2014;**70**:1261–7.  
11  
12 45 Meredith S, Feldman P, Frey D, *et al*. Improving medication use in newly admitted home  
13  
14 healthcare patients: A randomized controlled trial. *J Am Geriatr Soc* 2002;**50**:1484–91.  
15  
16 doi:10.1046/j.1532-5415.2002.50402.x  
17  
18  
19 46 Sjoberg C, Wallerstedt SM. Effects of medication reviews performed by a physician on  
20  
21 treatment with fracture-preventing and fall-risk-increasing drugs in older adults with hip  
22  
23 fracture-a randomized controlled study. *J Am Geriatr Soc* 2013;**61**:1464–72.  
24  
25  
26  
27  
28  
29  
30  
31  
32  
33  
34  
35  
36  
37  
38  
39  
40  
41  
42  
43  
44  
45  
46  
47  
48  
49  
50  
51  
52  
53  
54  
55  
56  
57  
58  
59  
60

1  
2  
3 **FIGURES**  
4

5 **Figure 1:** PRISMA Flow Diagram of Study Selection Process  
6

7 **Figure 2:** Forest Plots of FRID Withdrawal versus Usual Care  
8

9 **Figure 3:** Risk of Bias Assessments  
10  
11  
12  
13  
14  
15  
16  
17  
18  
19  
20  
21  
22  
23  
24  
25  
26  
27  
28  
29  
30  
31  
32  
33  
34  
35  
36  
37  
38  
39  
40  
41  
42  
43  
44  
45  
46  
47  
48  
49  
50  
51  
52  
53  
54  
55  
56  
57  
58  
59  
60

For peer review only

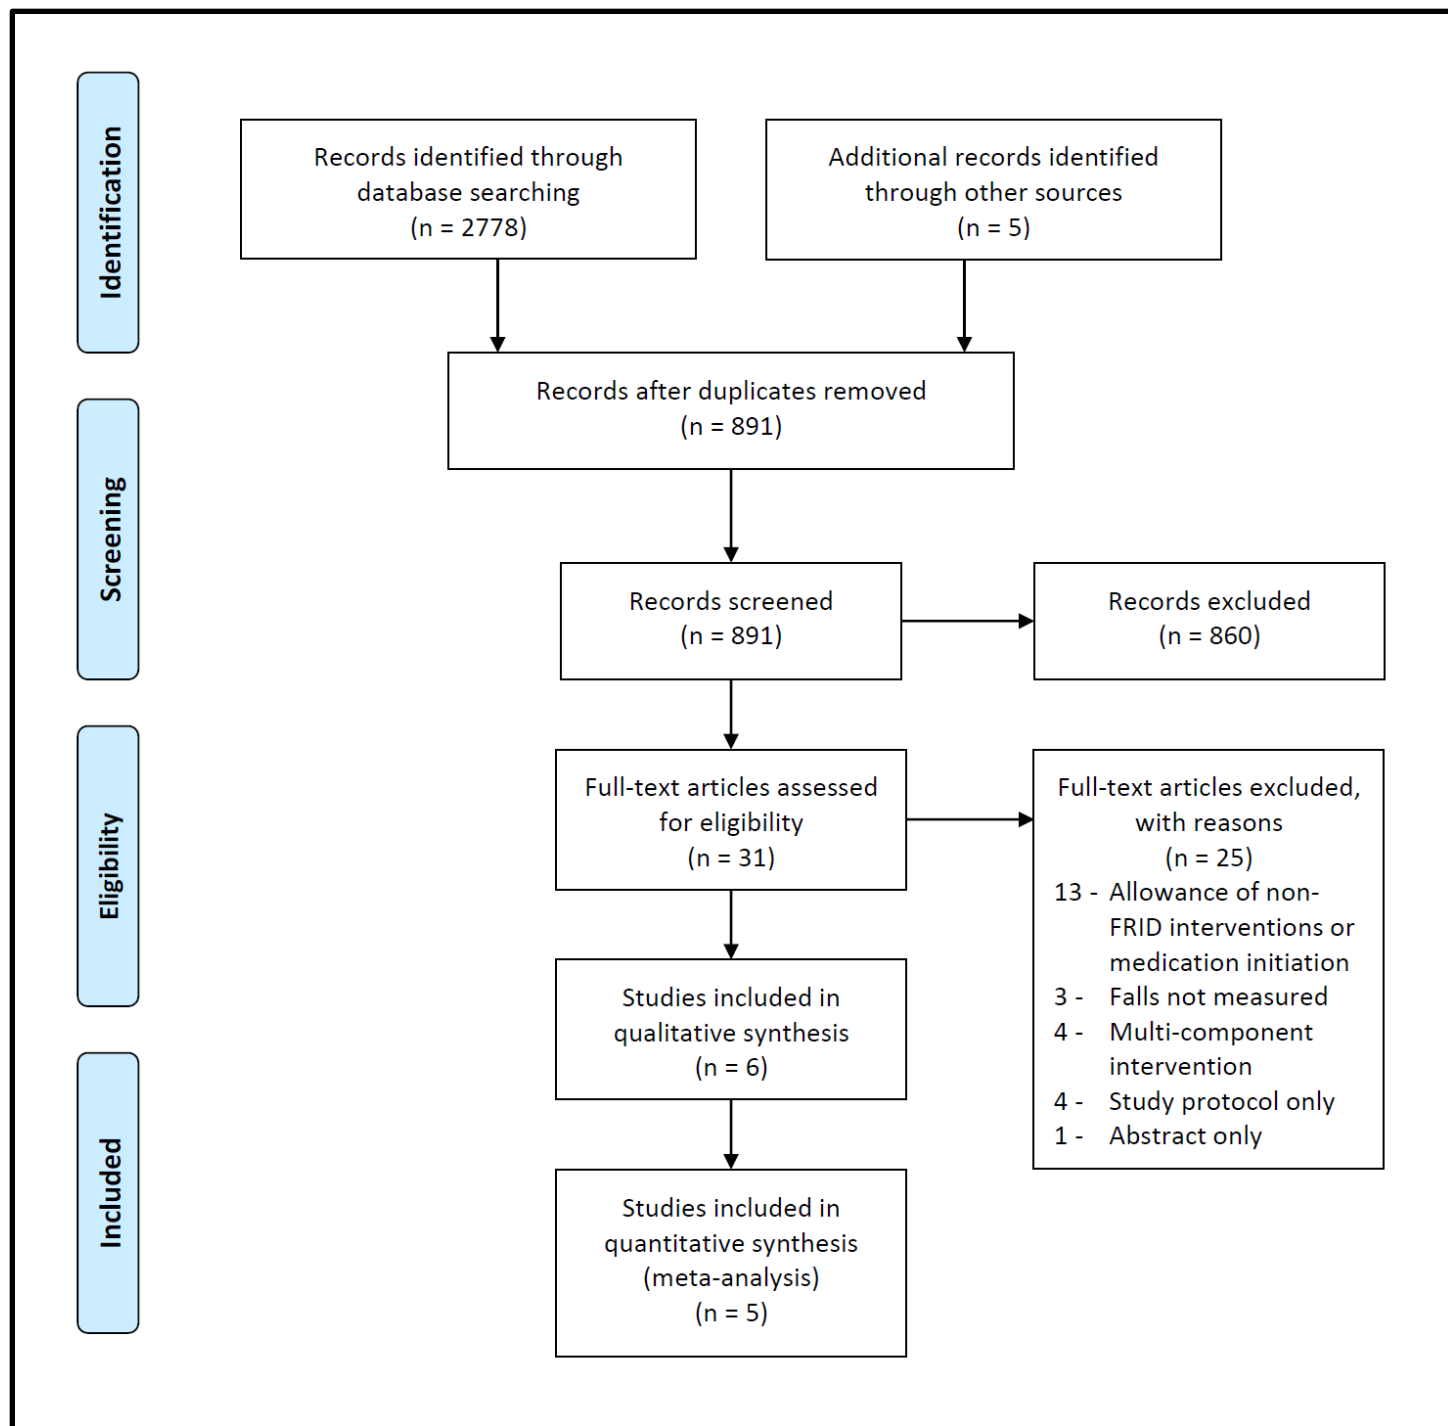

## 1.1 Falls Rate

1

2

3

4

5

6

7

8

9

10

11

12

13

14

15

16

17

18

19

20

21

22

23

24

25

26

27

28

29

30

31

32

33

34

35

36

37

38

39

40

41

42

43

44

45

46

47

48

49

50

51

52

| Study or Subgroup     | FRID Withdrawal |        | Usual Care |            | Weight        | Rate Ratio         |                     | Year |
|-----------------------|-----------------|--------|------------|------------|---------------|--------------------|---------------------|------|
|                       | log[Rate Ratio] | SE     | Total      | Total      |               | IV, Random, 95% CI | Year                |      |
| Campbell 1999         | -0.8023         | 0.2434 | 48         | 45         | 23.4%         | 0.45               | [0.28, 0.72]        | 1999 |
| Patterson 2010        | 0.3549          | 0.1465 | 173        | 161        | 28.4%         | 1.43               | [1.07, 1.90]        | 2010 |
| Blalock 2010          | 0.003           | 0.1117 | 93         | 93         | 29.9%         | 1.00               | [0.81, 1.25]        | 2010 |
| Mott 2016             | 0.3379          | 0.3416 | 39         | 41         | 18.4%         | 1.40               | [0.72, 2.74]        | 2016 |
| <b>Total (95% CI)</b> |                 |        | <b>353</b> | <b>340</b> | <b>100.0%</b> | <b>0.98</b>        | <b>[0.63, 1.51]</b> |      |

Heterogeneity: Tau<sup>2</sup> = 0.15; Chi<sup>2</sup> = 17.47, df = 3 (P = 0.0006); I<sup>2</sup> = 83%

Test for overall effect: Z = 0.11 (P = 0.92)

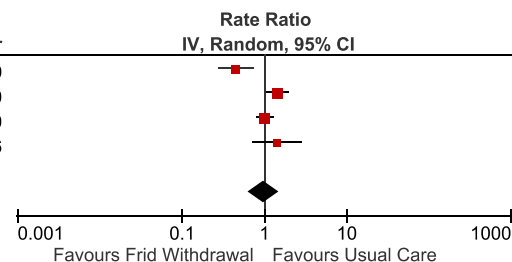

## 2.1 Falls Incidence – Risk Ratio

13

14

15

16

17

18

19

20

21

22

23

24

25

26

27

28

29

30

31

32

33

34

35

36

37

38

39

40

41

42

43

44

45

46

47

48

49

50

51

52

| Study or Subgroup     | FRID Withdrawal |            | Usual Care |            | Weight        | Risk Ratio          |                     |
|-----------------------|-----------------|------------|------------|------------|---------------|---------------------|---------------------|
|                       | Events          | Total      | Events     | Total      |               | M-H, Random, 95% CI | M-H, Random, 95% CI |
| Campbell 1999         | 11              | 48         | 17         | 45         | 8.4%          | 0.61                | [0.32, 1.15]        |
| Blalock 2010          | 53              | 93         | 52         | 93         | 39.3%         | 1.02                | [0.79, 1.31]        |
| Mott 2016             | 11              | 39         | 10         | 41         | 6.4%          | 1.16                | [0.55, 2.41]        |
| Boyé 2017             | 115             | 319        | 91         | 293        | 45.9%         | 1.16                | [0.93, 1.45]        |
| <b>Total (95% CI)</b> |                 | <b>499</b> |            | <b>472</b> | <b>100.0%</b> | <b>1.04</b>         | <b>[0.86, 1.26]</b> |

Total events 190 170

Heterogeneity: Tau<sup>2</sup> = 0.01; Chi<sup>2</sup> = 3.70, df = 3 (P = 0.30); I<sup>2</sup> = 19%

Test for overall effect: Z = 0.44 (P = 0.66)



## 2.2 Falls Incidence – Risk Difference

27

28

29

30

31

32

33

34

35

36

37

38

39

40

41

42

43

44

45

46

47

48

49

50

51

52

| Study or Subgroup     | FRID Withdrawal |            | Usual Care |            | Weight        | Risk Difference     |                      |
|-----------------------|-----------------|------------|------------|------------|---------------|---------------------|----------------------|
|                       | Events          | Total      | Events     | Total      |               | M-H, Random, 95% CI | M-H, Random, 95% CI  |
| Campbell 1999         | 11              | 48         | 17         | 45         | 14.2%         | -0.15               | [-0.33, 0.04]        |
| Blalock 2010          | 53              | 93         | 52         | 93         | 21.8%         | 0.01                | [-0.13, 0.15]        |
| Mott 2016             | 11              | 39         | 10         | 41         | 13.2%         | 0.04                | [-0.15, 0.23]        |
| Boyé 2017             | 115             | 319        | 91         | 293        | 50.9%         | 0.05                | [-0.02, 0.12]        |
| <b>Total (95% CI)</b> |                 | <b>499</b> |            | <b>472</b> | <b>100.0%</b> | <b>0.01</b>         | <b>[-0.06, 0.09]</b> |

Total events 190 170

Heterogeneity: Tau<sup>2</sup> = 0.00; Chi<sup>2</sup> = 3.86, df = 3 (P = 0.28); I<sup>2</sup> = 22%

Test for overall effect: Z = 0.31 (P = 0.76)



## 3.1 Fall-Related Injuries

41

42

43

44

45

46

47

48

49

50

51

52

| Study or Subgroup     | FRID Withdrawal |        | Usual Care |           | Weight        | Rate Ratio         |                     | Year |
|-----------------------|-----------------|--------|------------|-----------|---------------|--------------------|---------------------|------|
|                       | log[Rate Ratio] | SE     | Total      | Total     |               | IV, Random, 95% CI | Year                |      |
| Blalock 2010          | -0.1165         | 0.2273 | 93         | 93        | 100.0%        | 0.89               | [0.57, 1.39]        | 2010 |
| <b>Total (95% CI)</b> |                 |        | <b>93</b>  | <b>93</b> | <b>100.0%</b> | <b>0.89</b>        | <b>[0.57, 1.39]</b> |      |

Heterogeneity: Not applicable

Test for overall effect: Z = 0.51 (P = 0.61)





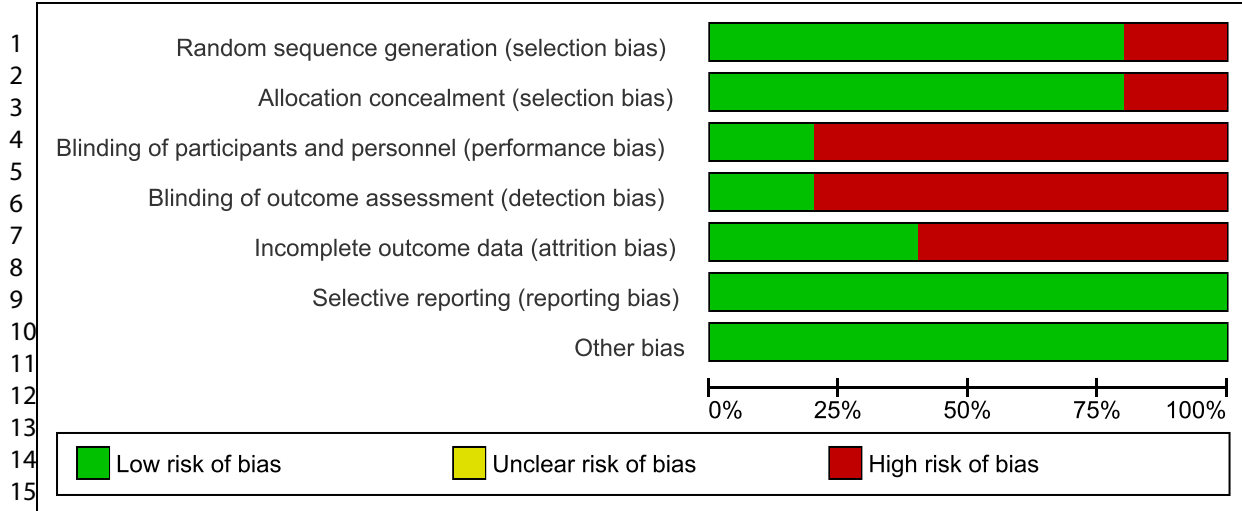

|                | Random sequence generation (selection bias) | Allocation concealment (selection bias) | Blinding of participants and personnel (performance bias) | Blinding of outcome assessment (detection bias) | Incomplete outcome data (attrition bias) | Selective reporting (reporting bias) | Other bias |
|----------------|---------------------------------------------|-----------------------------------------|-----------------------------------------------------------|-------------------------------------------------|------------------------------------------|--------------------------------------|------------|
| Blalock 2010   | +                                           | +                                       | -                                                         | -                                               | -                                        | +                                    | +          |
| Boyé 2017      | +                                           | +                                       | -                                                         | -                                               | -                                        | +                                    | +          |
| Campbell 1999  | +                                           | +                                       | +                                                         | +                                               | -                                        | +                                    | +          |
| Mott 2016      | -                                           | -                                       | -                                                         | -                                               | +                                        | +                                    | +          |
| Patterson 2010 | +                                           | +                                       | -                                                         | -                                               | +                                        | +                                    | +          |

## Supplementary Figure S1: OVID Medline Search Strategy

Database(s): OVID Medline Epub Ahead of Print, In-Process & Other Non-Indexed Citations, Ovid MEDLINE(R) Daily and Ovid MEDLINE(R) 1946 to Present  
Search Strategy:

| #  | Searches                                                                                                                                                                                                                                                                                                                                                                                                                                                                                                                   |
|----|----------------------------------------------------------------------------------------------------------------------------------------------------------------------------------------------------------------------------------------------------------------------------------------------------------------------------------------------------------------------------------------------------------------------------------------------------------------------------------------------------------------------------|
| 1  | exp Accidental Falls/pc [Prevention & Control]                                                                                                                                                                                                                                                                                                                                                                                                                                                                             |
| 2  | fall.mp. [mp=title, abstract, original title, name of substance word, subject heading word, floating sub-heading word, keyword heading word, protocol supplementary concept word, rare disease supplementary concept word, unique identifier, synonyms]                                                                                                                                                                                                                                                                    |
| 3  | falls.mp. [mp=title, abstract, original title, name of substance word, subject heading word, floating sub-heading word, keyword heading word, protocol supplementary concept word, rare disease supplementary concept word, unique identifier, synonyms]                                                                                                                                                                                                                                                                   |
| 4  | exp Deprescriptions/                                                                                                                                                                                                                                                                                                                                                                                                                                                                                                       |
| 5  | ((medicat* or drug*) adj3 (deprescrib* or withdraw* or cessat* or stop* or discontin*)) .mp. [mp=title, abstract, original title, name of substance word, subject heading word, floating sub-heading word, keyword heading word, protocol supplementary concept word, rare disease supplementary concept word, unique identifier, synonyms]                                                                                                                                                                                |
| 6  | ((antihypertensive* or diuretic* or beta-blocker* or sedative* or hypnotic* or neuroleptic* or antipsychotic* or antidepressant* or benzodiazepine* or narcotic* or opioid* or narcotic* or NSAID*) adj3 (deprescrib* or withdraw* or cessat* or stop* or discontin*)) .mp. [mp=title, abstract, original title, name of substance word, subject heading word, floating sub-heading word, keyword heading word, protocol supplementary concept word, rare disease supplementary concept word, unique identifier, synonyms] |
| 7  | fall-risk increasing drugs.mp.                                                                                                                                                                                                                                                                                                                                                                                                                                                                                             |
| 8  | FRID.mp.                                                                                                                                                                                                                                                                                                                                                                                                                                                                                                                   |
| 9  | ((medicat* or drug*) adj3 (review* or improv* or program*)) .mp. [mp=title, abstract, original title, name of substance word, subject heading word, floating sub-heading word, keyword heading word, protocol supplementary concept word, rare disease supplementary concept word, unique identifier, synonyms]                                                                                                                                                                                                            |
| 10 | exp "Drug-Related Side Effects and Adverse Reactions"/pc [Prevention & Control]                                                                                                                                                                                                                                                                                                                                                                                                                                            |
| 11 | exp Medication Therapy Management/ or exp "Drug Utilization Review"/                                                                                                                                                                                                                                                                                                                                                                                                                                                       |
| 12 | 4 or 5 or 6 or 7 or 8 or 9 or 10 or 11                                                                                                                                                                                                                                                                                                                                                                                                                                                                                     |
| 13 | 1 or 2 or 3                                                                                                                                                                                                                                                                                                                                                                                                                                                                                                                |
| 14 | 12 and 13                                                                                                                                                                                                                                                                                                                                                                                                                                                                                                                  |
| 15 | remove duplicates from 14                                                                                                                                                                                                                                                                                                                                                                                                                                                                                                  |
| 16 | exp Clinical Trial/                                                                                                                                                                                                                                                                                                                                                                                                                                                                                                        |
| 17 | (randomized or randomised).ab,ti.                                                                                                                                                                                                                                                                                                                                                                                                                                                                                          |
| 18 | placebo.ab,ti.                                                                                                                                                                                                                                                                                                                                                                                                                                                                                                             |
| 19 | randomly.ab,ti.                                                                                                                                                                                                                                                                                                                                                                                                                                                                                                            |
| 20 | groups.ab,ti.                                                                                                                                                                                                                                                                                                                                                                                                                                                                                                              |
| 21 | randomized controlled trial.pt.                                                                                                                                                                                                                                                                                                                                                                                                                                                                                            |
| 22 | controlled clinical trial.pt.                                                                                                                                                                                                                                                                                                                                                                                                                                                                                              |
| 23 | 16 or 17 or 18 or 19 or 20 or 21 or 22                                                                                                                                                                                                                                                                                                                                                                                                                                                                                     |
| 24 | 15 and 23                                                                                                                                                                                                                                                                                                                                                                                                                                                                                                                  |

**Supplementary Figure S2: Subgroup Analyses**

**1.2 Falls Rate - Known vs. Unknown Faller**

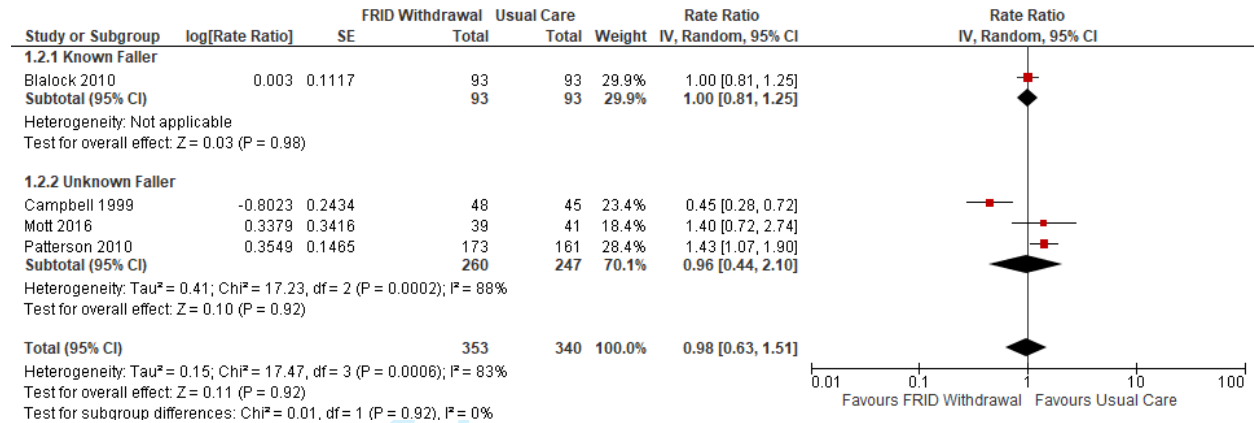

**1.3 Falls Rate - Community vs. Institutionalized**

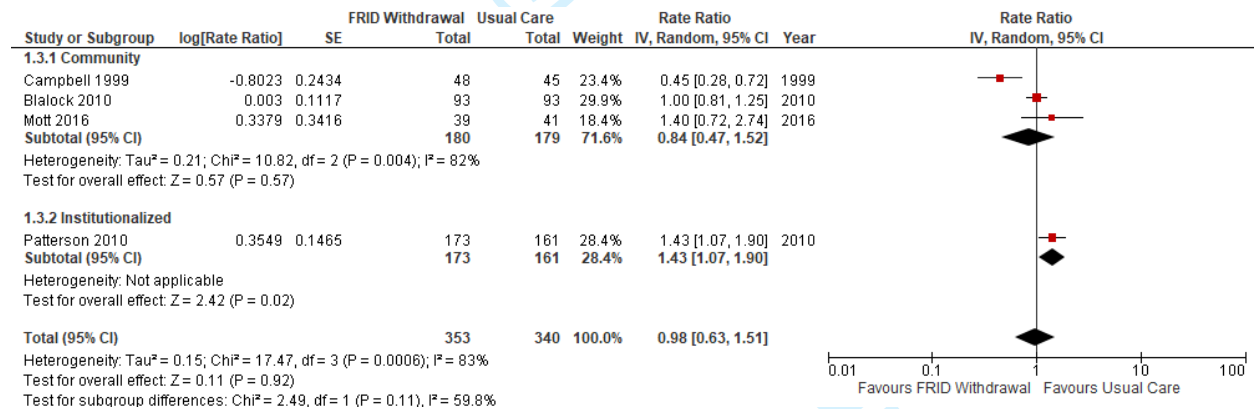

**1.4 Falls Rate - Psychotropic Withdrawal vs. Any FRID Withdrawal**

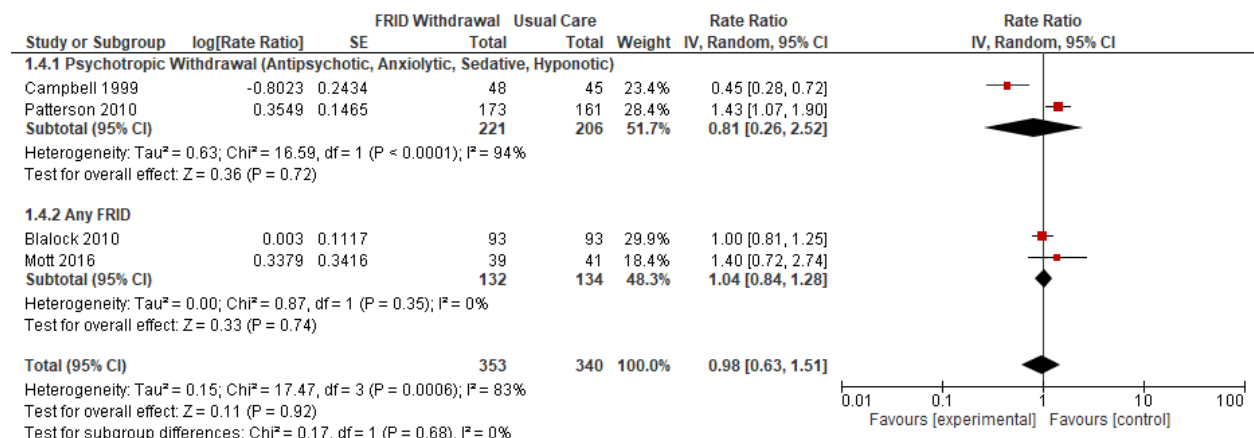

## 1.5 Falls Rate - Physician vs. Pharmacist Medication Review

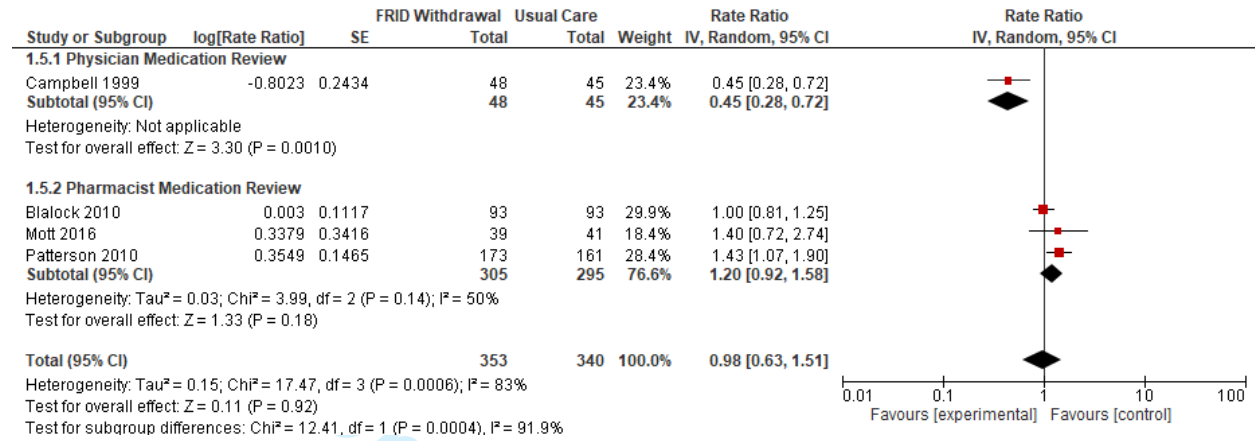

## 1.6 Falls Rate - Observed vs. Self-Reported Falls

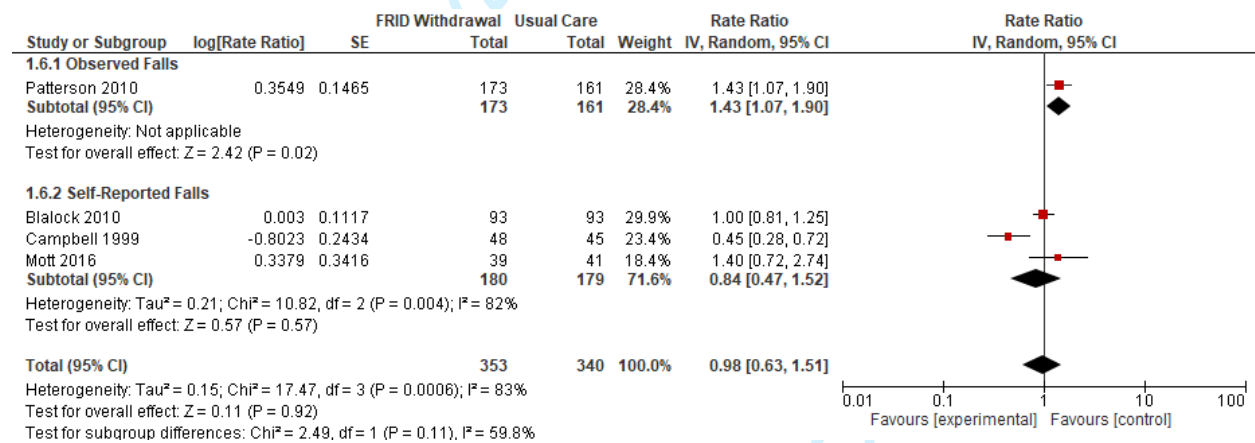

## 2.2 Falls Incidence - Known vs. Unknown Faller

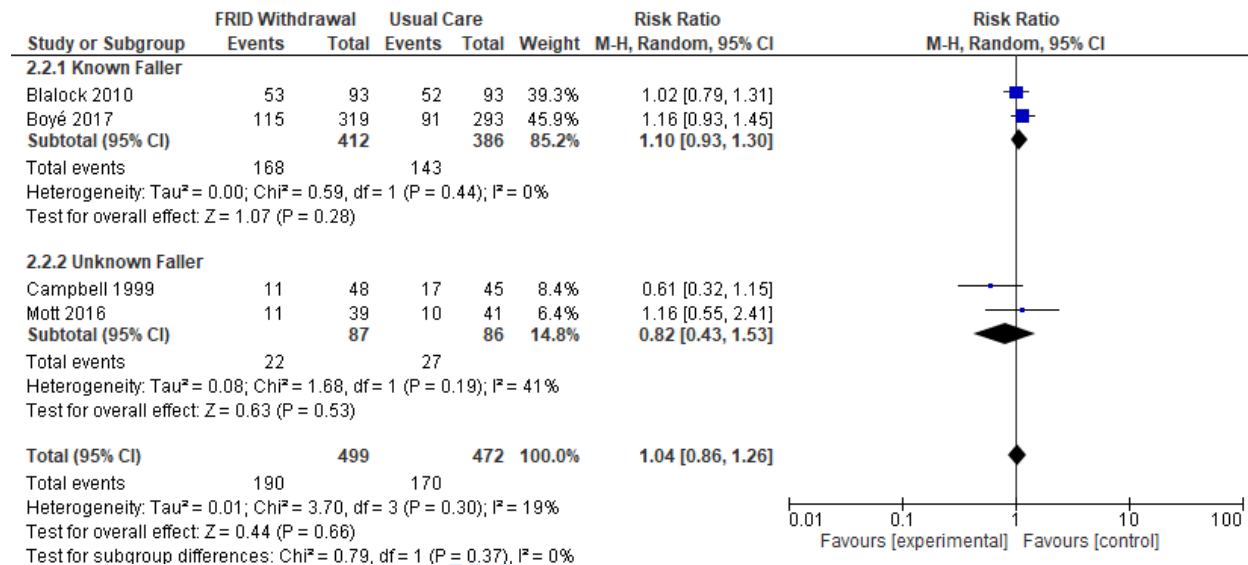

## 2.3 Falls Incidence - Psychotropic Withdrawal vs. Any FRID Withdrawal

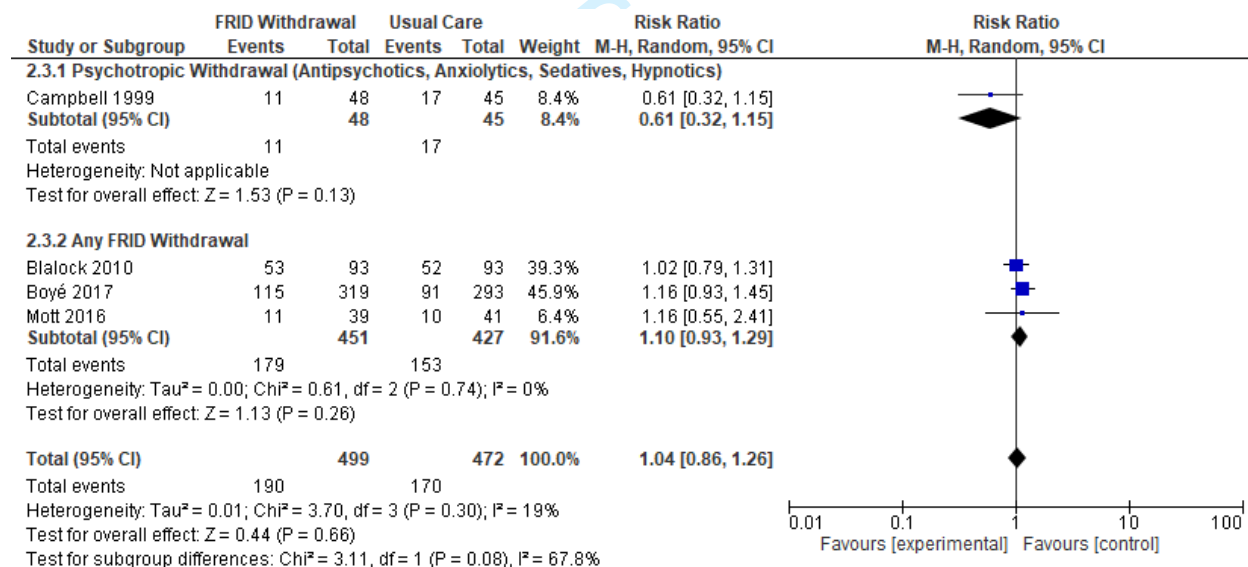

## 2.4 Falls Incidence - Physician vs. Pharmacist Medication Review

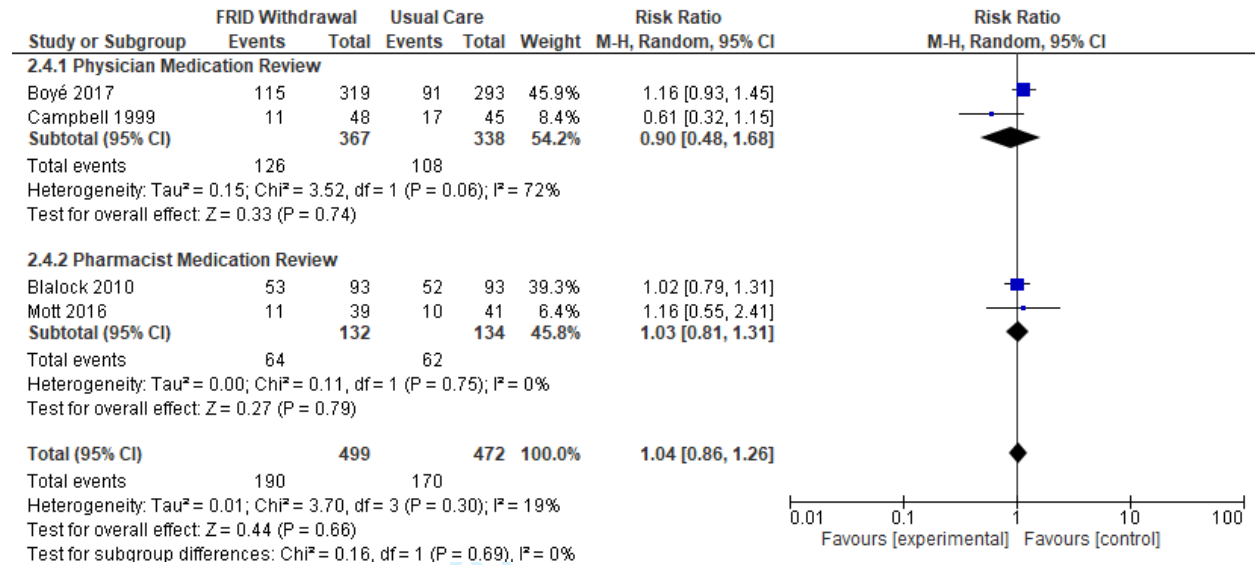

**Supplementary Table S1: Subgroup Credibility Assessment – Clinician Medication Review****Physician vs. Pharmacist Medication Review Subgroup for Falls Rate**

| <b>Design</b>                                                                                         | <b>Criteria Met?</b>                                                |
|-------------------------------------------------------------------------------------------------------|---------------------------------------------------------------------|
| Is the subgroup variable a characteristic measured at baseline or after randomization?                | Yes – Variable determined at baseline                               |
| Is the effect suggested by comparisons within rather than between studies?                            | No – Comparison between studies                                     |
| Was the hypothesis specified a priori?                                                                | Yes                                                                 |
| Was the direction of the subgroup effect specified a priori?                                          | No                                                                  |
| Was the subgroup effect one of a small number of hypothesized effects tested?                         | Yes – 1 of 5 analyses                                               |
| <b>Analysis</b>                                                                                       |                                                                     |
| Does the interaction test suggest a low likelihood that chance explains the apparent subgroup effect? | Yes – $p = 0.0004$                                                  |
| Is the significant subgroup effect independent?                                                       | Yes                                                                 |
| <b>Context</b>                                                                                        |                                                                     |
| Is the size of the subgroup effect large?                                                             | Yes – RaR 0.45 vs. 1.20                                             |
| Is the interaction consistent across studies?                                                         | No                                                                  |
| Is the interaction consistent across closely related outcomes within the study?                       | No – Subgroup interaction was not seen for incidence of falls       |
| Is there indirect evidence that supports the hypothesized interaction (biological rationale)?         | No - No compelling external evidence supporting subgroup hypothesis |

**Supplementary Table S2: Subgroup Credibility Assessment – FRID Withdrawal Type****Antipsychotic vs. Any FRID Withdrawal for Falls Incidence**

| <b>Design</b>                                                                                         | <b>Criteria Met?</b>                                                                                                                                                         |
|-------------------------------------------------------------------------------------------------------|------------------------------------------------------------------------------------------------------------------------------------------------------------------------------|
| Is the subgroup variable a characteristic measured at baseline or after randomization?                | Yes – Variable determined at baseline                                                                                                                                        |
| Is the effect suggested by comparisons within rather than between studies?                            | No – Comparison between studies                                                                                                                                              |
| Was the hypothesis specified a priori?                                                                | Yes                                                                                                                                                                          |
| Was the direction of the subgroup effect specified a priori?                                          | No                                                                                                                                                                           |
| Was the subgroup effect one of a small number of hypothesized effects tested?                         | Yes – 1 of 3 analyses                                                                                                                                                        |
| <b>Analysis</b>                                                                                       |                                                                                                                                                                              |
| Does the interaction test suggest a low likelihood that chance explains the apparent subgroup effect? | Yes – $p=0.06$                                                                                                                                                               |
| Is the significant subgroup effect independent?                                                       | No                                                                                                                                                                           |
| <b>Context</b>                                                                                        |                                                                                                                                                                              |
| Is the size of the subgroup effect large?                                                             | Yes – RR 0.61 vs. 1.14                                                                                                                                                       |
| Is the interaction consistent across studies?                                                         | No                                                                                                                                                                           |
| Is the interaction consistent across closely related outcomes within the study?                       | No – Subgroup interaction was not seen for rate of falls                                                                                                                     |
| Is there indirect evidence that supports the hypothesized interaction (biological rationale)?         | Yes – Antipsychotics associated with one of highest risks of falls. The withdrawal of any FRID may involve withdrawal of those with lower risks and limit potential benefit. |



**Supplementary Figure S3: Sensitivity Analyses**

**4.1 Falls Rate - Low vs. High Risk of Bias due to Blinding**

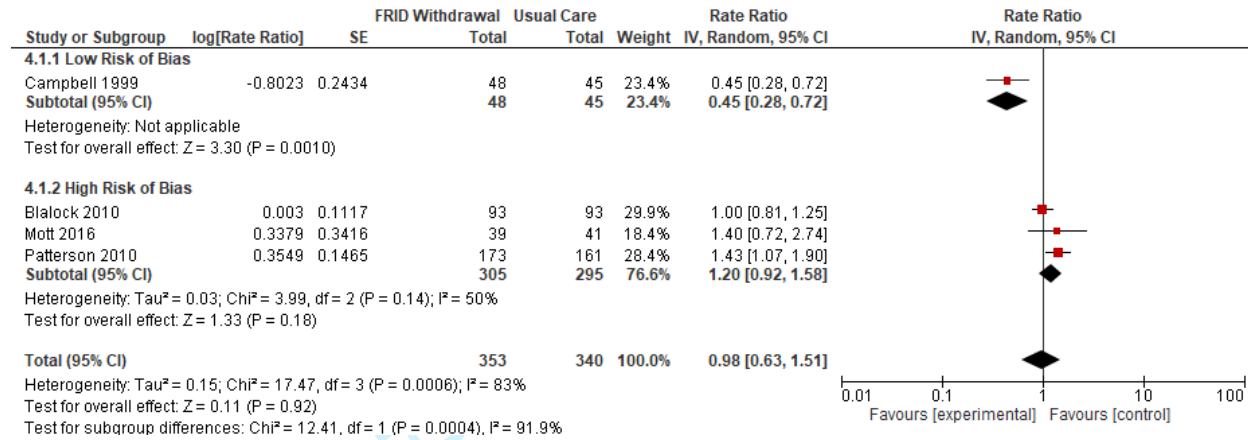

**4.2 Falls Rate - Low vs. High Risk of Bias due to Attritional Bias**

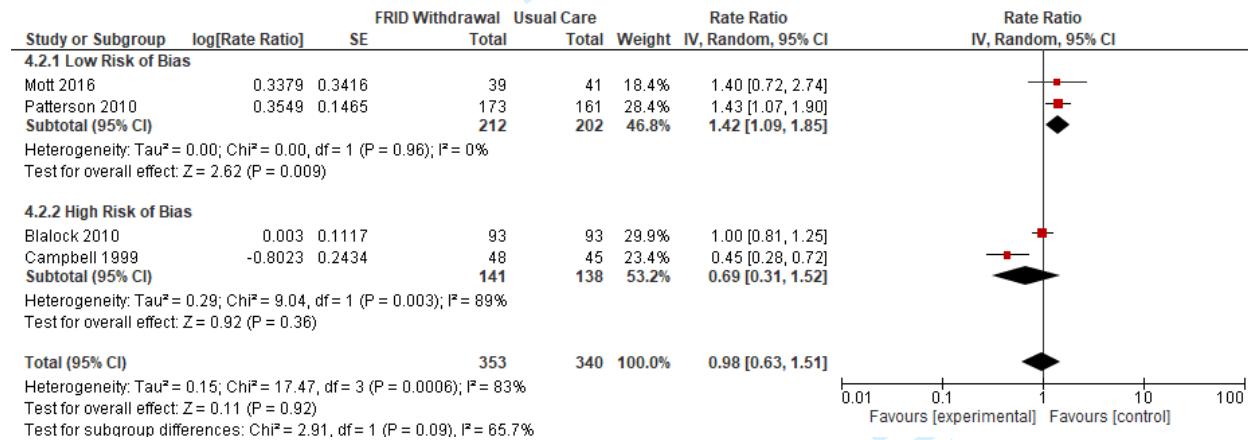

### 4.3 Falls Incidence - Low vs. High Risk of Bias due to Blinding

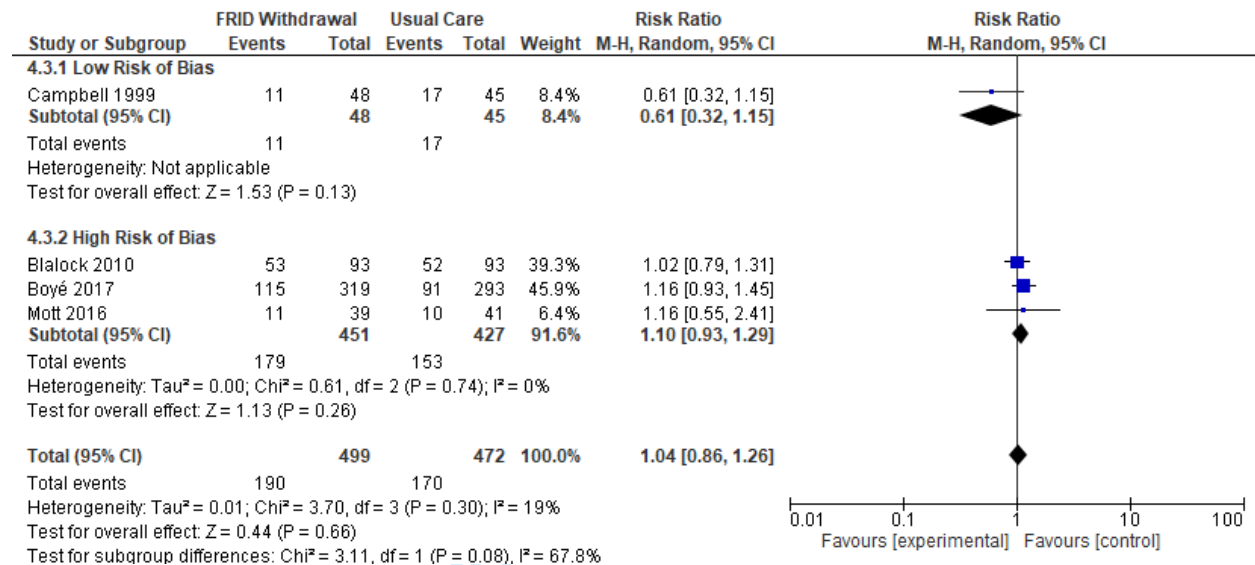

### 4.4 Falls Incidence - Low vs. High Risk of Bias due to Attrition Bias

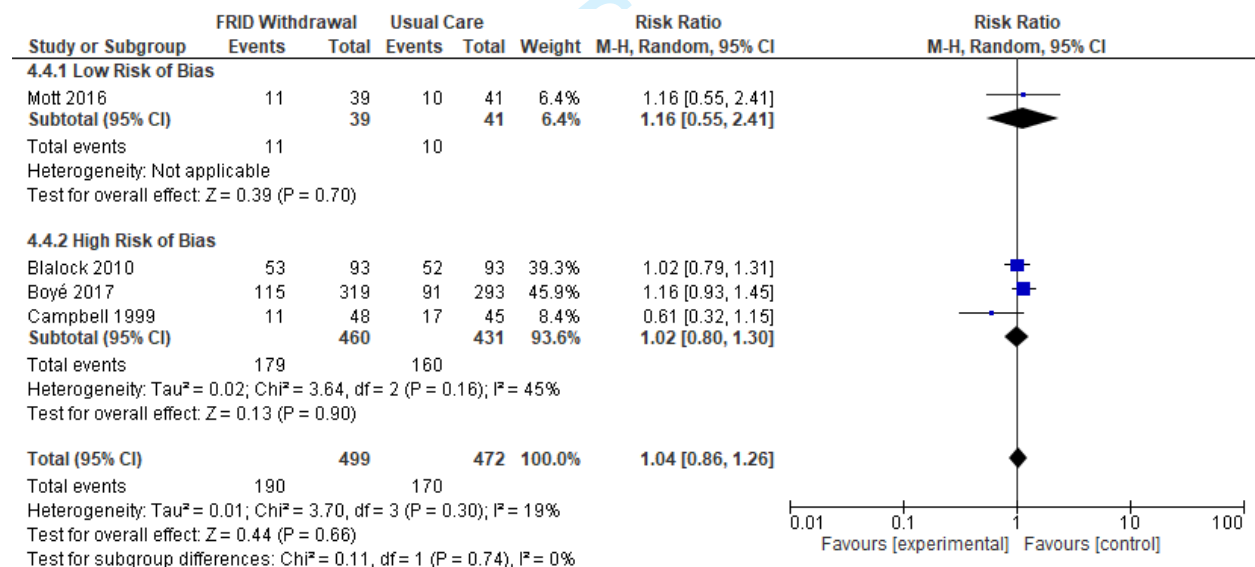

## 4.5 Falls Rate – Random vs. Effects Model

### Random Effects Model

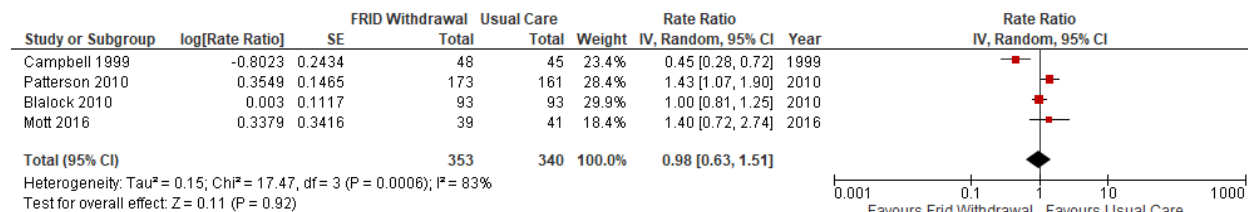

### Fixed Effects Model

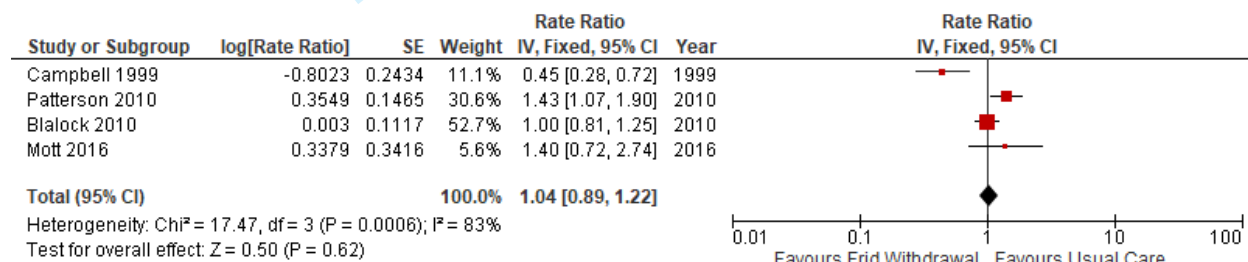

## 4.6 Falls Incidence – Random vs. Fixed Effects Model

### Random Effects Model

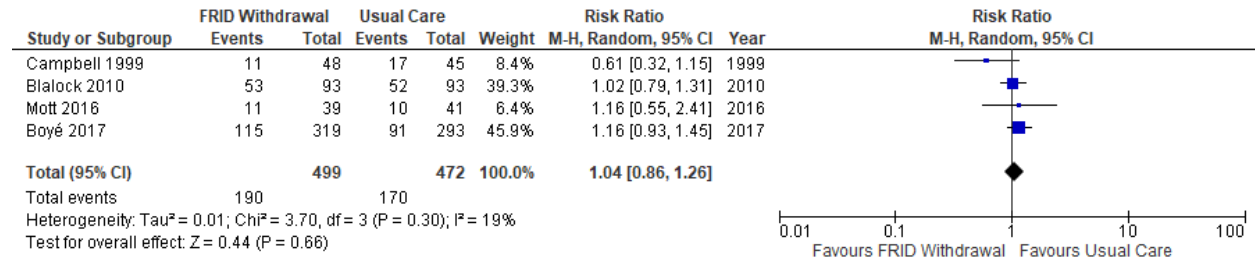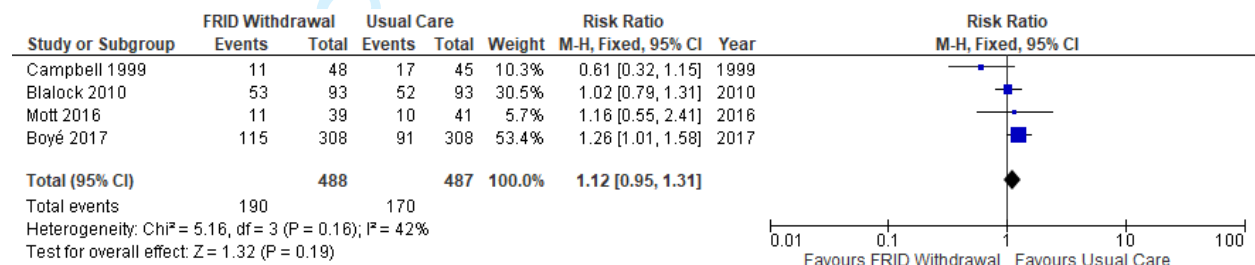

### Fixed Effects Model

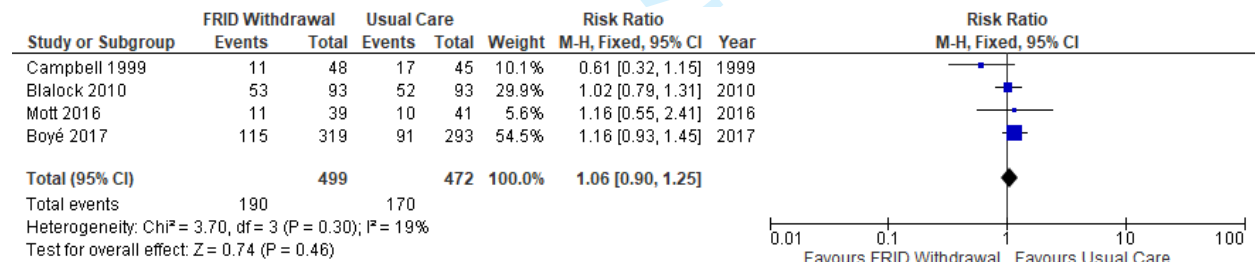

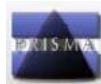

# PRISMA 2009 Checklist

| Section/topic                      | #  | Checklist item                                                                                                                                                                                                                                                                                              | Reported on page #      |
|------------------------------------|----|-------------------------------------------------------------------------------------------------------------------------------------------------------------------------------------------------------------------------------------------------------------------------------------------------------------|-------------------------|
| <b>TITLE</b>                       |    |                                                                                                                                                                                                                                                                                                             |                         |
| Title                              | 1  | Identify the report as a systematic review, meta-analysis, or both.                                                                                                                                                                                                                                         | 1                       |
| <b>ABSTRACT</b>                    |    |                                                                                                                                                                                                                                                                                                             |                         |
| Structured summary                 | 2  | Provide a structured summary including, as applicable: background; objectives; data sources; study eligibility criteria, participants, and interventions; study appraisal and synthesis methods; results; limitations; conclusions and implications of key findings; systematic review registration number. | 2-3                     |
| <b>INTRODUCTION</b>                |    |                                                                                                                                                                                                                                                                                                             |                         |
| Rationale                          | 3  | Describe the rationale for the review in the context of what is already known.                                                                                                                                                                                                                              | 5-6                     |
| Objectives                         | 4  | Provide an explicit statement of questions being addressed with reference to participants, interventions, comparisons, outcomes, and study design (PICOS).                                                                                                                                                  | 7                       |
| <b>METHODS</b>                     |    |                                                                                                                                                                                                                                                                                                             |                         |
| Protocol and registration          | 5  | Indicate if a review protocol exists, if and where it can be accessed (e.g., Web address), and, if available, provide registration information including registration number.                                                                                                                               | 7                       |
| Eligibility criteria               | 6  | Specify study characteristics (e.g., PICOS, length of follow-up) and report characteristics (e.g., years considered, language, publication status) used as criteria for eligibility, giving rationale.                                                                                                      | 7-8                     |
| Information sources                | 7  | Describe all information sources (e.g., databases with dates of coverage, contact with study authors to identify additional studies) in the search and date last searched.                                                                                                                                  | 7                       |
| Search                             | 8  | Present full electronic search strategy for at least one database, including any limits used, such that it could be repeated.                                                                                                                                                                               | Supplementary Figure S1 |
| Study selection                    | 9  | State the process for selecting studies (i.e., screening, eligibility, included in systematic review, and, if applicable, included in the meta-analysis).                                                                                                                                                   | 7-8                     |
| Data collection process            | 10 | Describe method of data extraction from reports (e.g., piloted forms, independently, in duplicate) and any processes for obtaining and confirming data from investigators.                                                                                                                                  | 8-9                     |
| Data items                         | 11 | List and define all variables for which data were sought (e.g., PICOS, funding sources) and any assumptions and simplifications made.                                                                                                                                                                       | 8                       |
| Risk of bias in individual studies | 12 | Describe methods used for assessing risk of bias of individual studies (including specification of whether this was done at the study or outcome level), and how this information is to be used in any data synthesis.                                                                                      | 8-9                     |
| Summary measures                   | 13 | State the principal summary measures (e.g., risk ratio, difference in means).                                                                                                                                                                                                                               | 9                       |
| Synthesis of results               | 14 | Describe the methods of handling data and combining results of studies, if done, including measures of consistency (e.g., $I^2$ ) for each meta-analysis.                                                                                                                                                   | 9-10                    |



# PRISMA 2009 Checklist

| Section/topic                 | #  | Checklist item                                                                                                                                                                                           | Reported on page # |
|-------------------------------|----|----------------------------------------------------------------------------------------------------------------------------------------------------------------------------------------------------------|--------------------|
| Risk of bias across studies   | 15 | Specify any assessment of risk of bias that may affect the cumulative evidence (e.g., publication bias, selective reporting within studies).                                                             | 9-10               |
| Additional analyses           | 16 | Describe methods of additional analyses (e.g., sensitivity or subgroup analyses, meta-regression), if done, indicating which were pre-specified.                                                         | 9-10               |
| <b>RESULTS</b>                |    |                                                                                                                                                                                                          |                    |
| Study selection               | 17 | Give numbers of studies screened, assessed for eligibility, and included in the review, with reasons for exclusions at each stage, ideally with a flow diagram.                                          | 10<br>Figure 1     |
| Study characteristics         | 18 | For each study, present characteristics for which data were extracted (e.g., study size, PICOS, follow-up period) and provide the citations.                                                             | 10-11<br>Table 1   |
| Risk of bias within studies   | 19 | Present data on risk of bias of each study and, if available, any outcome level assessment (see item 12).                                                                                                | 13-14<br>Figure 3  |
| Results of individual studies | 20 | For all outcomes considered (benefits or harms), present, for each study: (a) simple summary data for each intervention group (b) effect estimates and confidence intervals, ideally with a forest plot. | 12-13,<br>Figure 2 |
| Synthesis of results          | 21 | Present results of each meta-analysis done, including confidence intervals and measures of consistency.                                                                                                  | 12-13<br>Figure 2  |
| Risk of bias across studies   | 22 | Present results of any assessment of risk of bias across studies (see Item 15).                                                                                                                          | 15-16<br>Table 2   |
| Additional analysis           | 23 | Give results of additional analyses, if done (e.g., sensitivity or subgroup analyses, meta-regression [see Item 16]).                                                                                    | 14-15              |
| <b>DISCUSSION</b>             |    |                                                                                                                                                                                                          |                    |
| Summary of evidence           | 24 | Summarize the main findings including the strength of evidence for each main outcome; consider their relevance to key groups (e.g., healthcare providers, users, and policy makers).                     | 17-20              |
| Limitations                   | 25 | Discuss limitations at study and outcome level (e.g., risk of bias), and at review-level (e.g., incomplete retrieval of identified research, reporting bias).                                            | 20-21              |
| Conclusions                   | 26 | Provide a general interpretation of the results in the context of other evidence, and implications for future research.                                                                                  | 21                 |
| <b>FUNDING</b>                |    |                                                                                                                                                                                                          |                    |
| Funding                       | 27 | Describe sources of funding for the systematic review and other support (e.g., supply of data); role of funders for the systematic review.                                                               | 22                 |

From: Moher D, Liberati A, Tetzlaff J, Altman DG, The PRISMA Group (2009). Preferred Reporting Items for Systematic Reviews and Meta-Analyses: The PRISMA Statement. PLoS Med 6(6): e1000097. doi:10.1371/journal.pmed1000097

For more information, visit: [www.prisma-statement.org](http://www.prisma-statement.org).

For peer review only - <http://bmjopen.bmj.com/site/about/guidelines.xhtml>
